# Supplementary material for: 2-Formyl boron-dipyrromethene as a key synthon to prepare functionalized meso-boron dipyrromethenyl porphyrin building blocks
Source: Royal Society of Chemistry journal article supplement (doi:10.1039/c4ra10807h), 2014-11-19
Supplement: c4ra10807h1.pdf [file c4ra10807h1.pdf]

## Supporting Information

### 2-Formyl Boron-Dipyrromethene as Key Synthon to Prepare Functionalized *Meso*-Boron

#### Dipyrromethenyl Porphyrin Building Blocks

Sunit Kumar and Mangalampalli Ravikanth\*

Indian Institute of Technology, Powai, Mumbai, 400076 India. Fax: 91-22-5723480

Tel: 91-22-5767176; E-mail: [ravikanth@chem.iitb.ac.in](mailto:ravikanth@chem.iitb.ac.in)

| Entry | Contents                                                                                             | Page no |
|-------|------------------------------------------------------------------------------------------------------|---------|
| 1     | <b>Figure S1.</b> HR mass spectrum of compound <b>1</b>                                              | 4       |
| 2     | <b>Figure S2.</b> $^1\text{H}$ NMR spectrum of compound <b>1</b> in $\text{CDCl}_3$                  | 5       |
| 3     | <b>Figure S3.</b> $^{13}\text{C}$ NMR spectrum of compound <b>1</b> in $\text{CDCl}_3$               | 6       |
| 4     | <b>Figure S4.</b> $^{19}\text{F}$ NMR spectrum of compound <b>1</b> in $\text{CDCl}_3$               | 7       |
| 5     | <b>Figure S5.</b> $^{11}\text{B}$ NMR spectrum of compound <b>1</b> in $\text{CDCl}_3$               | 8       |
| 6     | <b>Figure S6.</b> $^1\text{H}$ - $^1\text{H}$ COSY spectrum of compound <b>1</b> in $\text{CDCl}_3$  | 9       |
| 7     | <b>Figure S7.</b> $^1\text{H}$ - $^1\text{H}$ NOESY spectrum of compound <b>1</b> in $\text{CDCl}_3$ | 10      |
| 8     | <b>Figure S8.</b> HR mass spectrum of compound <b>2</b>                                              | 11      |
| 9     | <b>Figure S9.</b> $^1\text{H}$ NMR spectrum of compound <b>2</b> in $\text{CDCl}_3$                  | 12      |
| 10    | <b>Figure S10.</b> $^{13}\text{C}$ NMR spectrum of compound <b>2</b> in $\text{CDCl}_3$              | 13      |
| 11    | <b>Figure S11.</b> $^{19}\text{F}$ NMR spectrum of compound <b>2</b> in $\text{CDCl}_3$              | 14      |
| 12    | <b>Figure S12.</b> $^{11}\text{B}$ NMR spectrum of compound <b>2</b> in $\text{CDCl}_3$              | 15      |
| 13    | <b>Figure S13.</b> HR mass spectrum of compound <b>3</b>                                             | 16      |
| 14    | <b>Figure S14.</b> $^1\text{H}$ NMR spectrum of compound <b>3</b> in $\text{CDCl}_3$                 | 17      |
| 15    | <b>Figure S15.</b> $^{13}\text{C}$ NMR spectrum of compound <b>3</b> in $\text{CDCl}_3$              | 18      |
| 16    | <b>Figure S16.</b> $^{19}\text{F}$ NMR spectrum of compound <b>3</b> in $\text{CDCl}_3$              | 19      |
| 17    | <b>Figure S17.</b> $^{11}\text{B}$ NMR spectrum of compound <b>3</b> in $\text{CDCl}_3$              | 20      |
| 18    | <b>Figure S18.</b> HR mass spectrum of compound <b>4</b>                                             | 21      |

|    |                                                                                           |    |
|----|-------------------------------------------------------------------------------------------|----|
| 19 | <b>Figure S19.</b> $^1\text{H}$ NMR spectrum of compound <b>4</b> in $\text{CDCl}_3$      | 22 |
| 20 | <b>Figure S20.</b> $^{13}\text{C}$ NMR spectrum of compound <b>4</b> in $\text{CDCl}_3$   | 23 |
| 21 | <b>Figure S21.</b> $^{19}\text{F}$ NMR spectrum of compound <b>4</b> in $\text{CDCl}_3$   | 24 |
| 22 | <b>Figure S22.</b> $^{11}\text{B}$ NMR spectrum of compound <b>4</b> in $\text{CDCl}_3$   | 25 |
| 23 | <b>Figure S23.</b> HR mass spectrum of compound <b>5</b>                                  | 26 |
| 24 | <b>Figure S24.</b> $^1\text{H}$ NMR spectrum of compound <b>5</b> in $\text{CDCl}_3$      | 27 |
| 25 | <b>Figure S25.</b> $^{13}\text{C}$ NMR spectrum of compound <b>5</b> in $\text{CDCl}_3$   | 28 |
| 26 | <b>Figure S26.</b> $^{19}\text{F}$ NMR spectrum of compound <b>5</b> in $\text{CDCl}_3$   | 29 |
| 27 | <b>Figure S27.</b> $^{11}\text{B}$ NMR spectrum of compound <b>5</b> in $\text{CDCl}_3$   | 30 |
| 28 | <b>Figure S28.</b> HR mass spectrum of compound <b>6</b>                                  | 31 |
| 29 | <b>Figure S29.</b> $^1\text{H}$ NMR spectrum of compound <b>6</b> in $\text{CDCl}_3$      | 32 |
| 30 | <b>Figure S30.</b> $^{13}\text{C}$ NMR spectrum of compound <b>6</b> in $\text{CDCl}_3$   | 33 |
| 31 | <b>Figure S31.</b> $^{19}\text{F}$ NMR spectrum of compound <b>6</b> in $\text{CDCl}_3$   | 34 |
| 32 | <b>Figure S32.</b> $^{11}\text{B}$ NMR spectrum of compound <b>6</b> in $\text{CDCl}_3$   | 35 |
| 33 | <b>Figure S33.</b> HR mass spectrum of compound <b>7</b>                                  | 36 |
| 34 | <b>Figure S34.</b> $^1\text{H}$ NMR spectrum of compound <b>7</b> in $\text{CDCl}_3$      | 37 |
| 35 | <b>Figure S35.</b> $^{19}\text{F}$ NMR spectrum of compound <b>7</b> in $\text{CDCl}_3$   | 38 |
| 36 | <b>Figure S36.</b> $^{11}\text{B}$ NMR spectrum of compound <b>7</b> in $\text{CDCl}_3$   | 39 |
| 37 | <b>Figure S37.</b> HR mass spectrum of compound <b>Zn1</b>                                | 40 |
| 38 | <b>Figure S38.</b> $^1\text{H}$ NMR spectrum of compound <b>Zn1</b> in $\text{CDCl}_3$    | 41 |
| 39 | <b>Figure S39.</b> $^{19}\text{F}$ NMR spectrum of compound <b>Zn1</b> in $\text{CDCl}_3$ | 42 |
| 40 | <b>Figure S40.</b> $^{11}\text{B}$ NMR spectrum of compound <b>Zn1</b> in $\text{CDCl}_3$ | 43 |
| 41 | <b>Figure S41.</b> $^1\text{H}$ NMR spectrum of compound <b>Ni1</b> in $\text{CDCl}_3$    | 44 |
| 42 | <b>Figure S42.</b> $^{19}\text{F}$ NMR spectrum of compound <b>Ni1</b> in $\text{CDCl}_3$ | 45 |
| 43 | <b>Figure S43.</b> $^{11}\text{B}$ NMR spectrum of compound <b>Ni1</b> in $\text{CDCl}_3$ | 46 |
| 44 | <b>Figure S44.</b> LR mass spectrum of compound <b>8</b>                                  | 47 |
| 45 | <b>Figure S45.</b> $^1\text{H}$ NMR spectrum of compound <b>8</b> in $\text{CDCl}_3$      | 48 |

|    |                                                                                                                                                                                               |           |
|----|-----------------------------------------------------------------------------------------------------------------------------------------------------------------------------------------------|-----------|
| 46 | <b>Figure S46.</b> $^{19}\text{F}$ NMR spectrum of compound <b>8</b> in $\text{CDCl}_3$                                                                                                       | <b>49</b> |
| 47 | <b>Figure S47.</b> $^{11}\text{B}$ NMR spectrum of compound <b>8</b> in $\text{CDCl}_3$                                                                                                       | <b>50</b> |
| 48 | <b>Figure S48.</b> Comparison of Emission spectrum of compound <b>8</b> and compound <b>9</b> (5 $\mu\text{M}$ ) recorded in $\text{CHCl}_3$ solvents. Excitation wavelength used was 488 nm. | <b>51</b> |

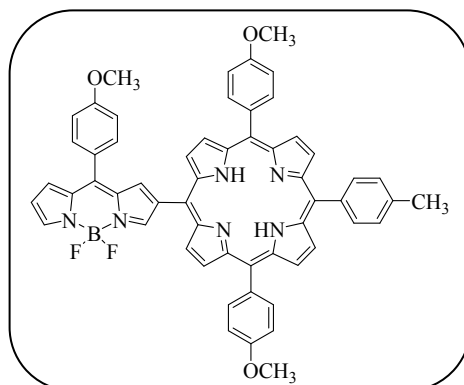

|               |  |                                |  |                                        |  |                           |  |
|---------------|--|--------------------------------|--|----------------------------------------|--|---------------------------|--|
| Analysis Info |  |                                |  | Acquisition Date 5/22/2014 11:30:35 PM |  |                           |  |
| Analysis Name |  | D:\Data\MAY 14\MRK-SK-BDPPOR.d |  | Operator                               |  | dm OUT                    |  |
| Method        |  | Tune_pos_Standard_NAI-1500.m   |  | Instrument                             |  | maXis impact 282001.00081 |  |
| Sample Name   |  | MRK-SK-BDPPOR                  |  |                                        |  |                           |  |
| Comment       |  | C57H43BF2N6O3                  |  |                                        |  |                           |  |

|                       |          |                       |            |                  |           |
|-----------------------|----------|-----------------------|------------|------------------|-----------|
| Acquisition Parameter |          |                       |            |                  |           |
| Source Type           | ESI      | Ion Polarity          | Positive   | Set Nebulizer    | 0.3 Bar   |
| Focus                 | Active   | Set Capillary         | 3700 V     | Set Dry Heater   | 180 °C    |
| Scan Begin            | 50 m/z   | Set End Plate Offset  | -500 V     | Set Dry Gas      | 4.0 l/min |
| Scan End              | 1500 m/z | Set Collision Cell RF | 1200.0 Vpp | Set Divert Valve | Source    |

909.3541-0.3min #3-16, 100%=94841

|           |   |               |          |           |        |         |        |      |                     |        |
|-----------|---|---------------|----------|-----------|--------|---------|--------|------|---------------------|--------|
| Meas. m/z | # | Ion Formula   | m/z      | err [ppm] | mSigma | # Sigma | Score  | rdb  | e <sup>-</sup> Conf | N-Rule |
| 909.3541  | 1 | C57H44BF2N6O3 | 909.3540 | -0.2      | 27.2   | 1       | 100.00 | 38.5 | even                | ok     |

Figure S1: HR mass spectrum of compound **1**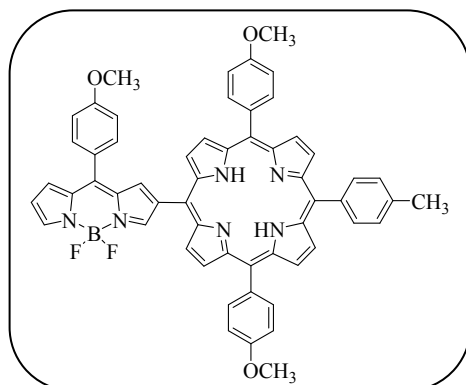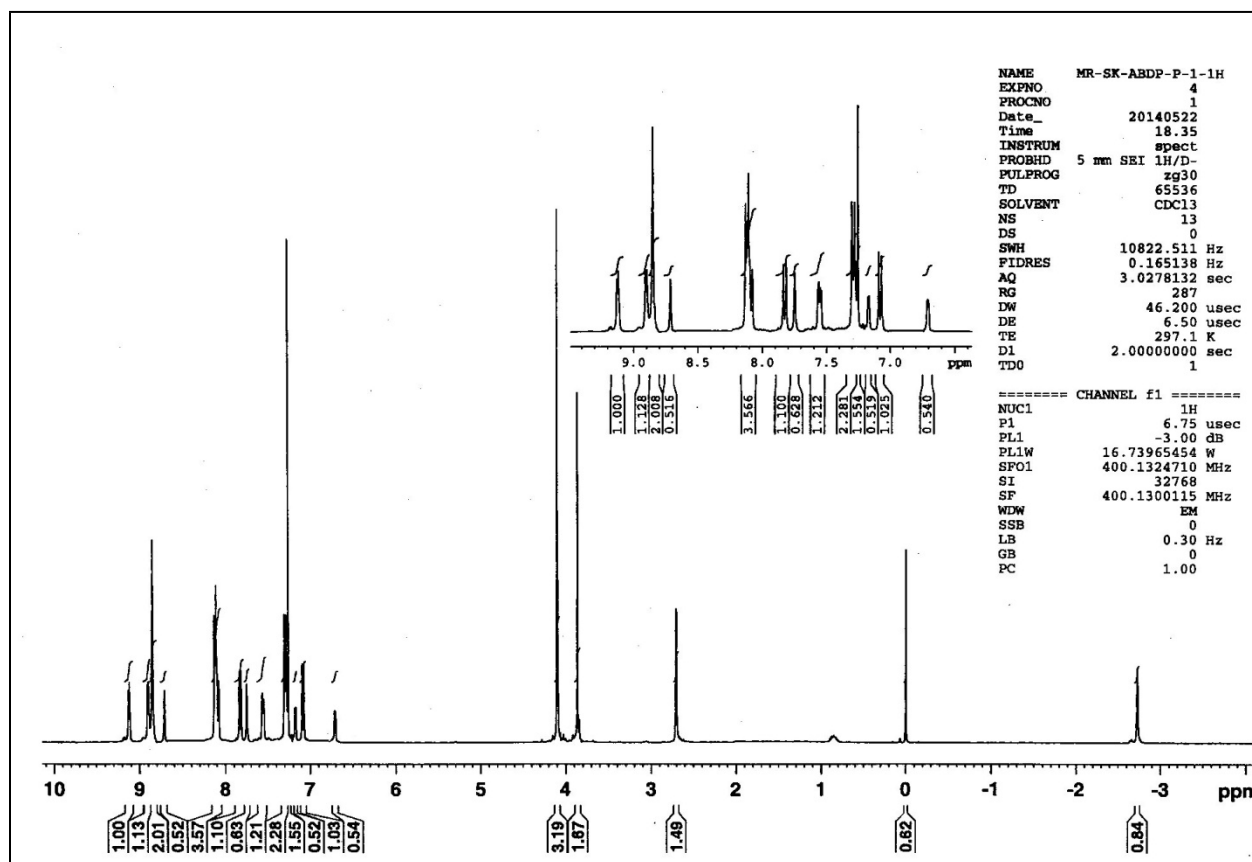Figure S2: <sup>1</sup>H NMR spectrum of compound **1** recorded in CDCl<sub>3</sub>

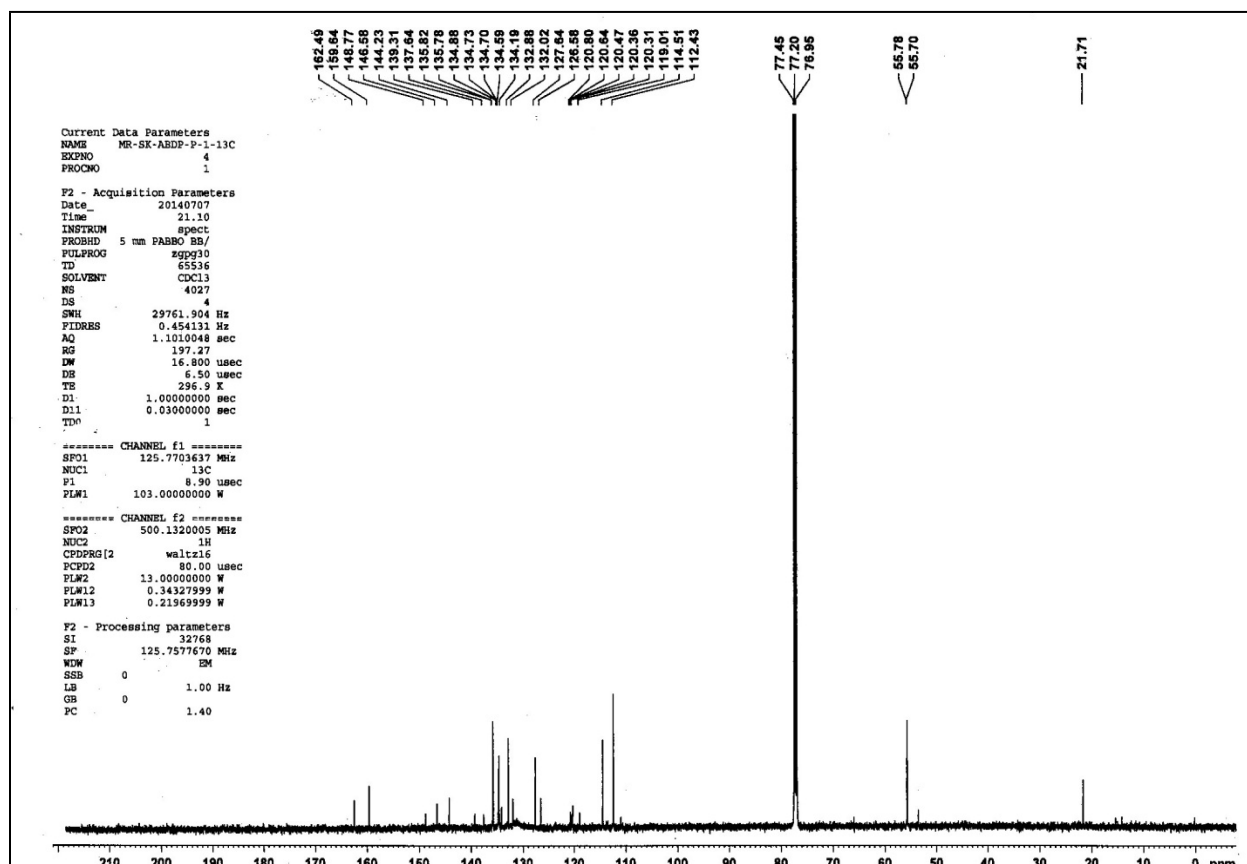

Figure S3: <sup>13</sup>C NMR spectrum of compound 1 recorded in CDCl<sub>3</sub>

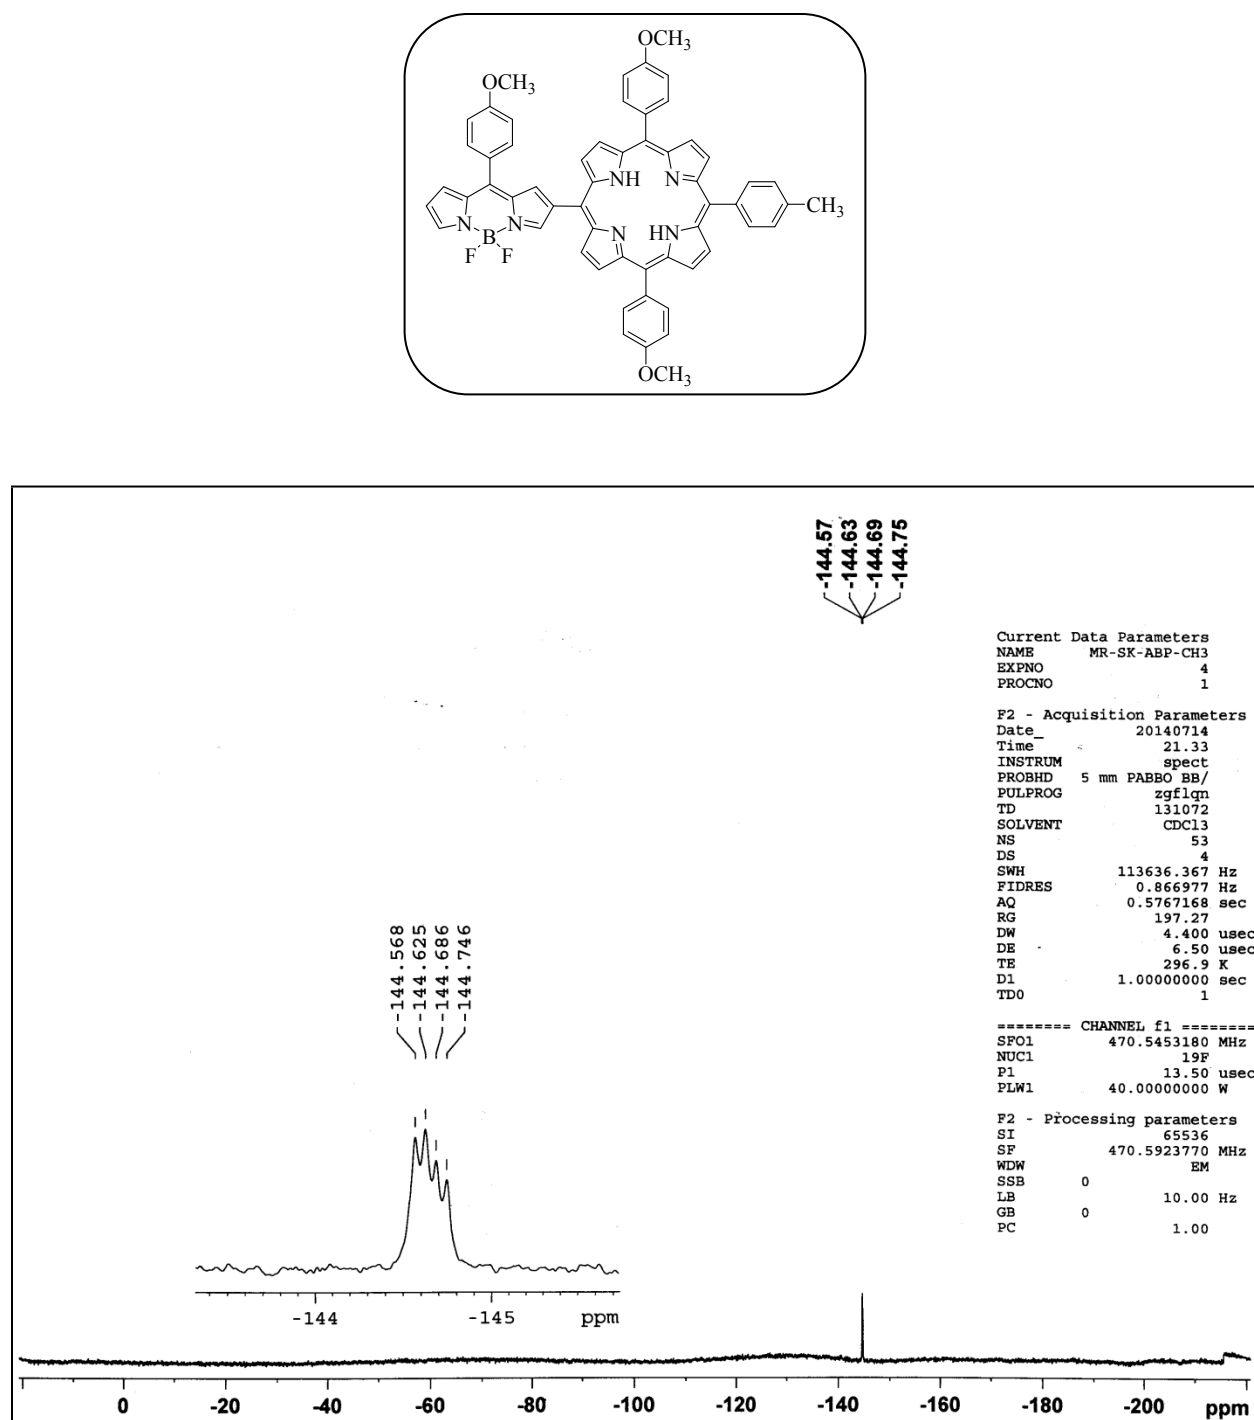

**Figure S4:** <sup>19</sup>F NMR spectrum of compound **1** recorded in CDCl<sub>3</sub>. Inset shows the expansion

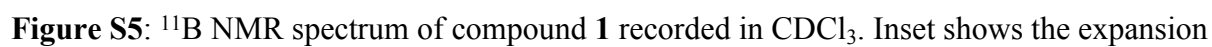

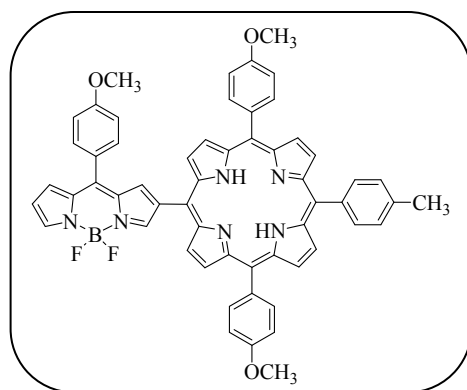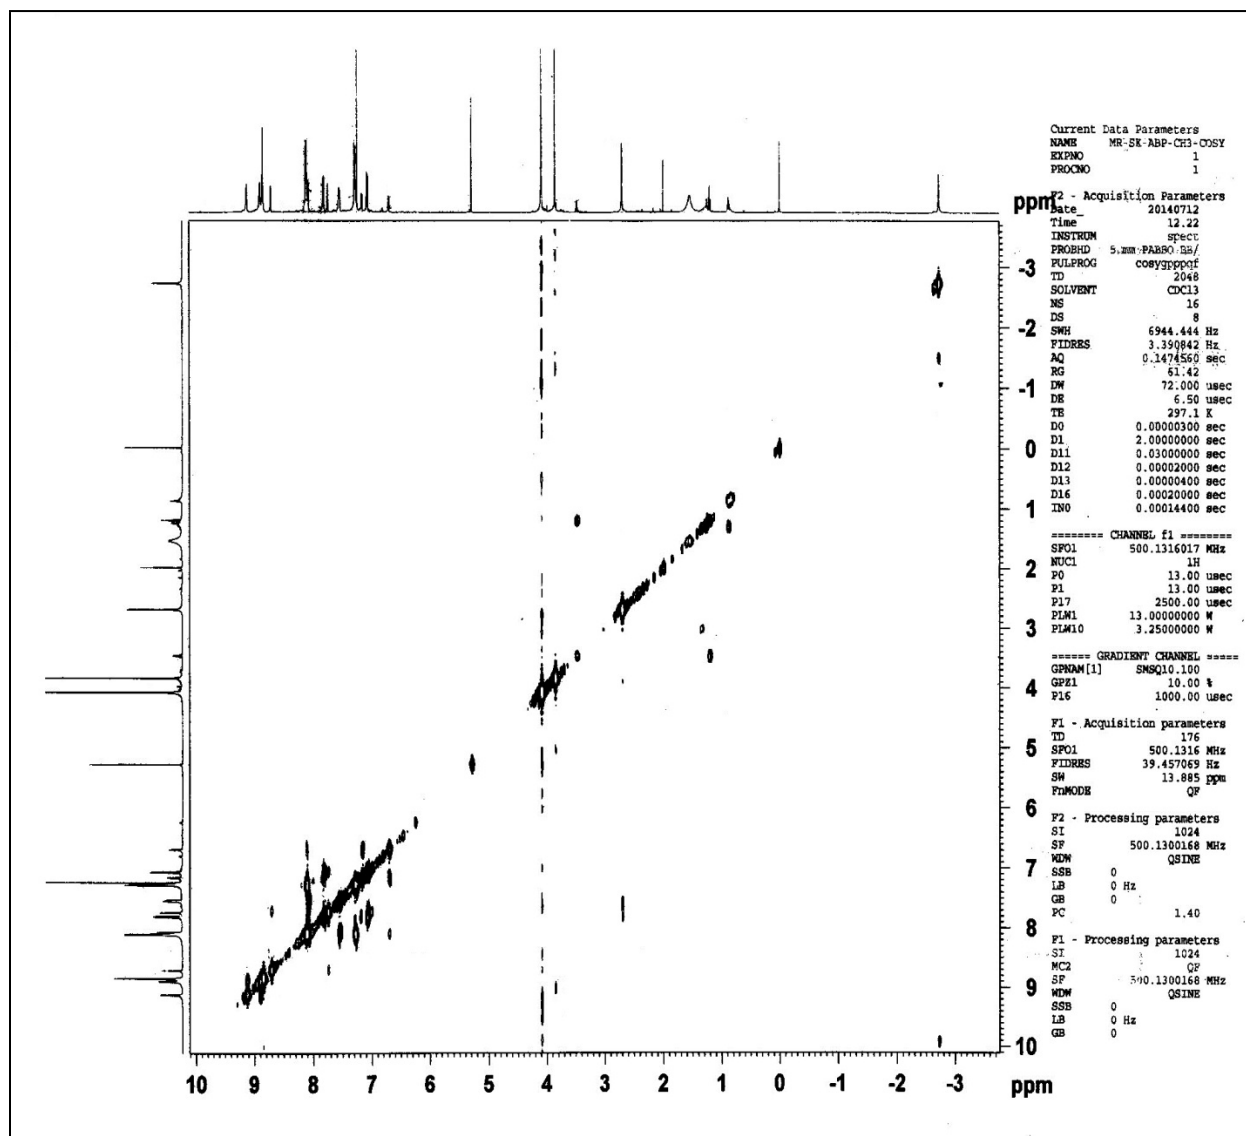

Figure S6:  $^1\text{H}$ - $^1\text{H}$  COSY spectrum of compound **1** recorded in  $\text{CDCl}_3$ .

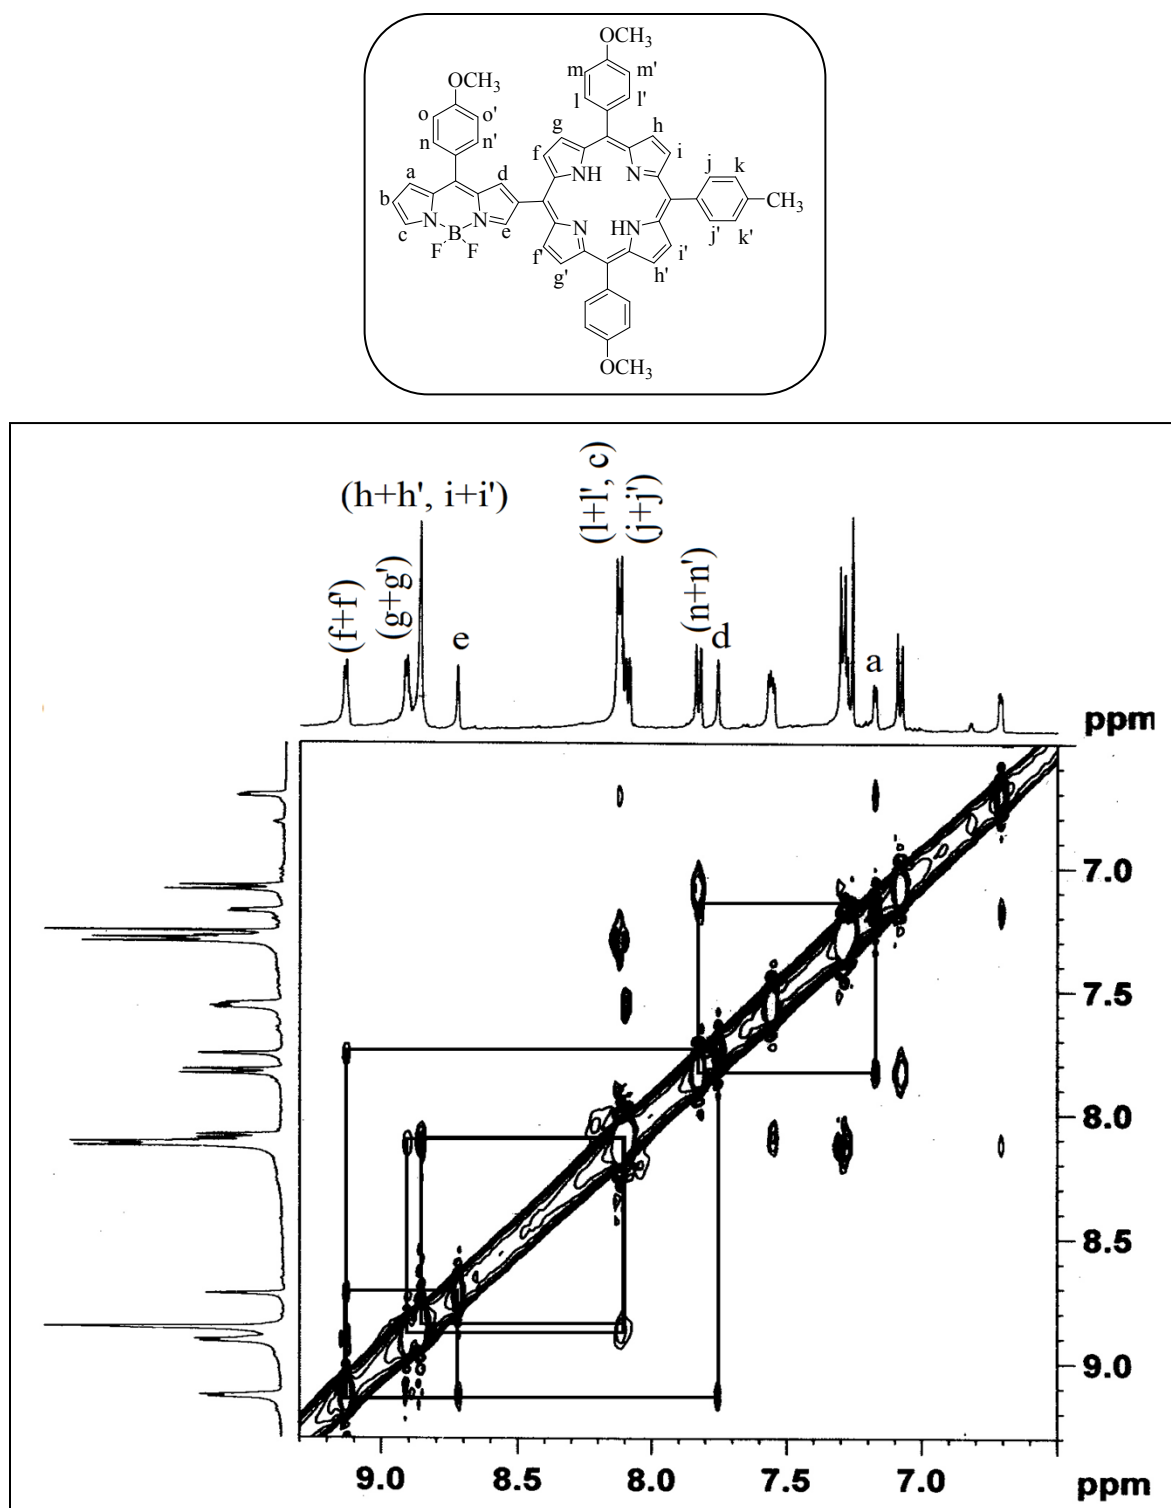

**Figure S7:** Partial  $^1\text{H}$ - $^1\text{H}$  NOESY spectrum of compound **1** recorded in  $\text{CDCl}_3$ .

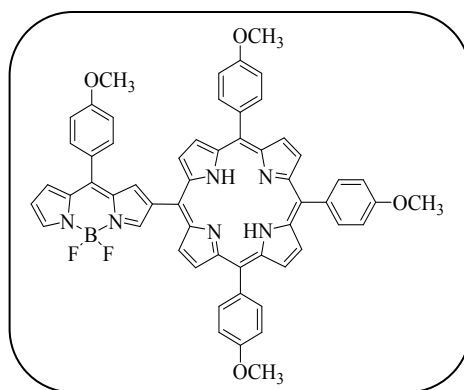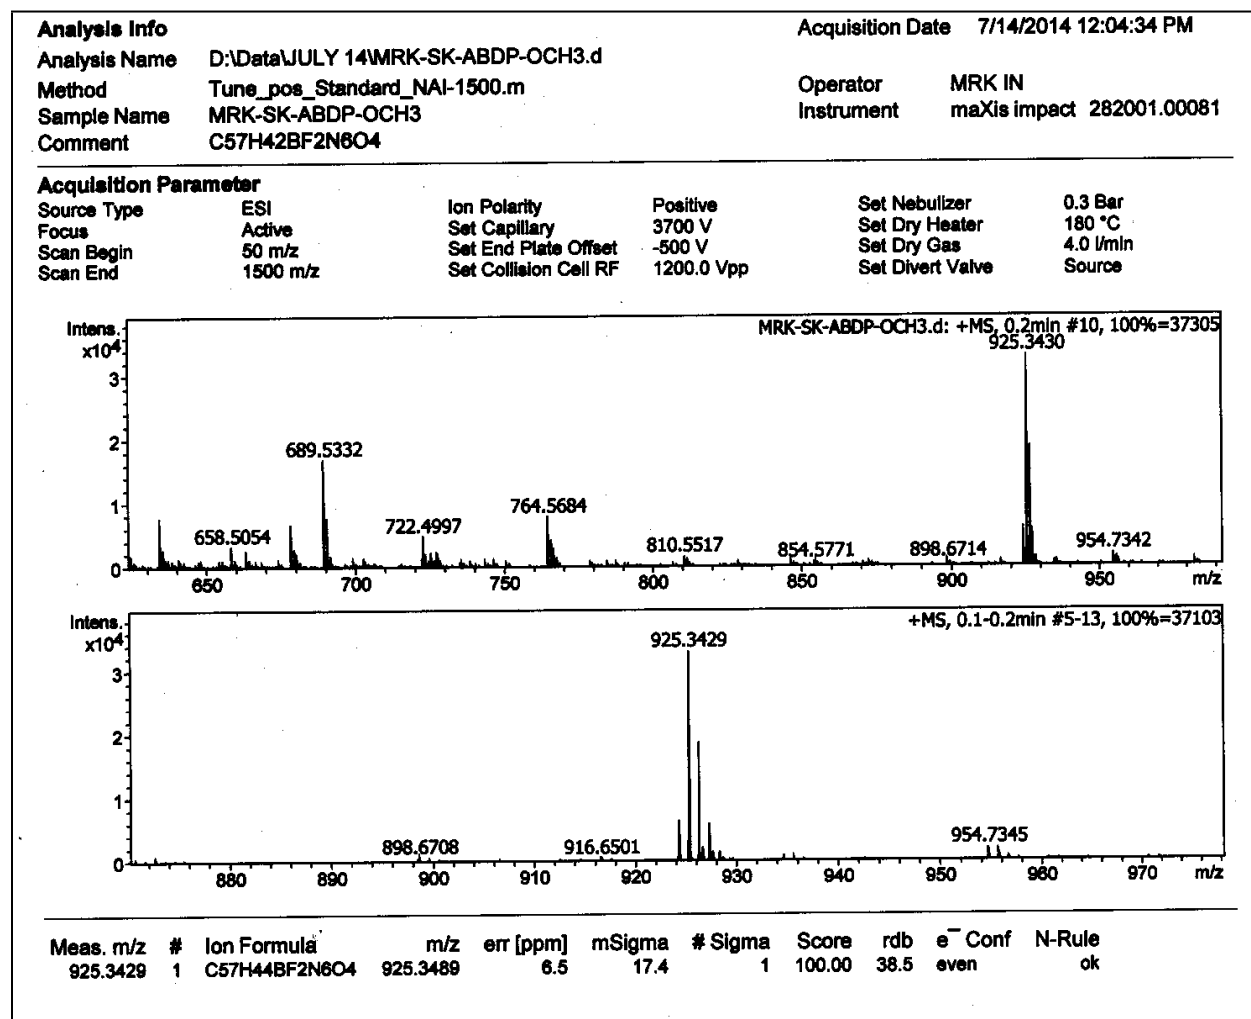

Figure S8: HR mass spectrum of compound 2

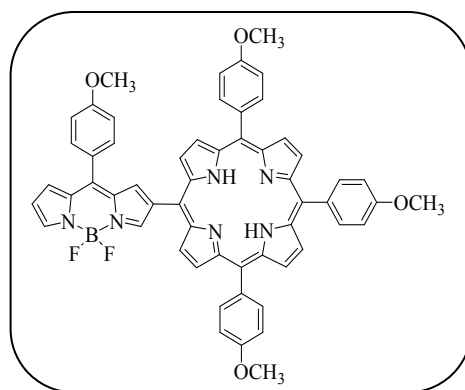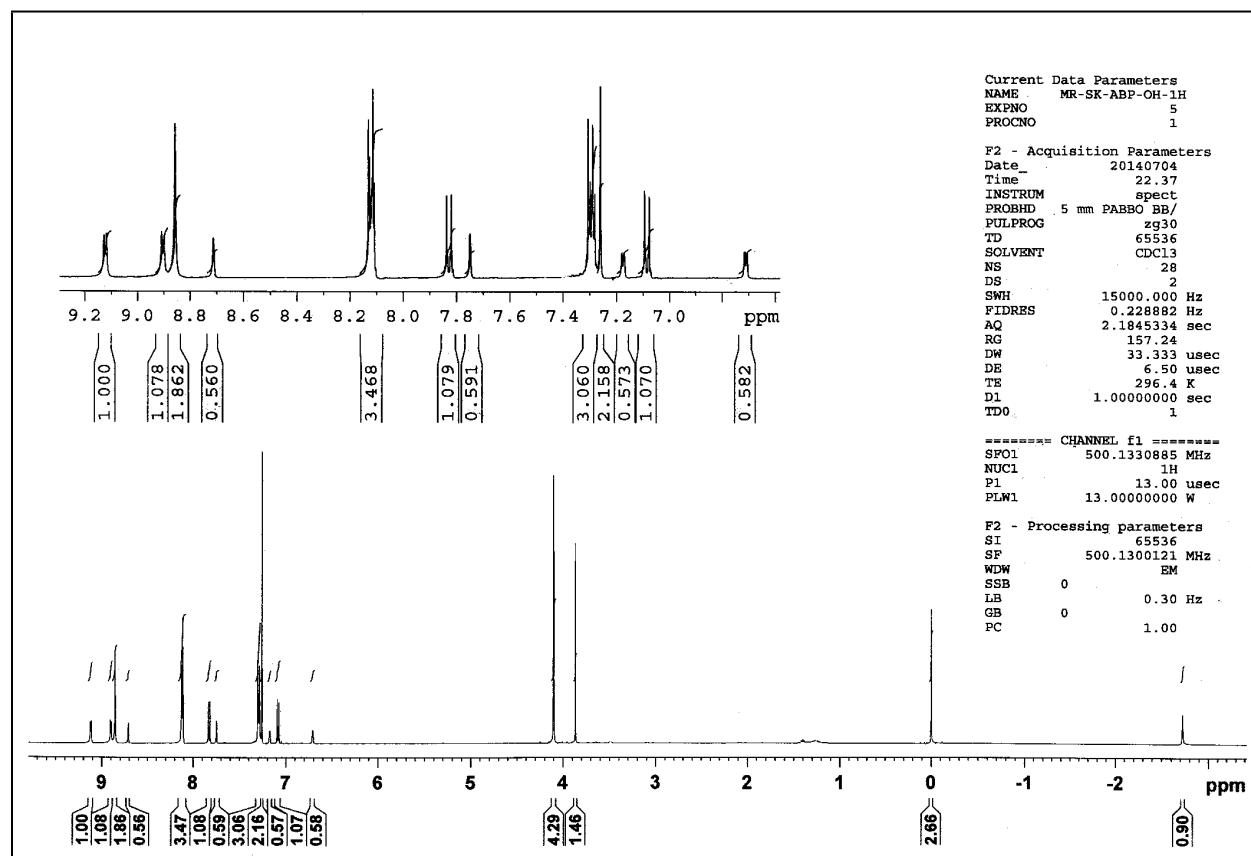

Figure S9:  $^1\text{H}$  NMR spectrum of compound **2** recorded in  $\text{CDCl}_3$

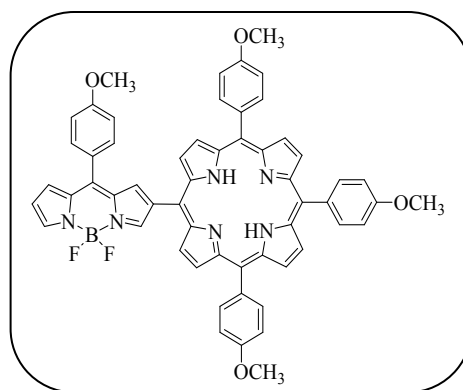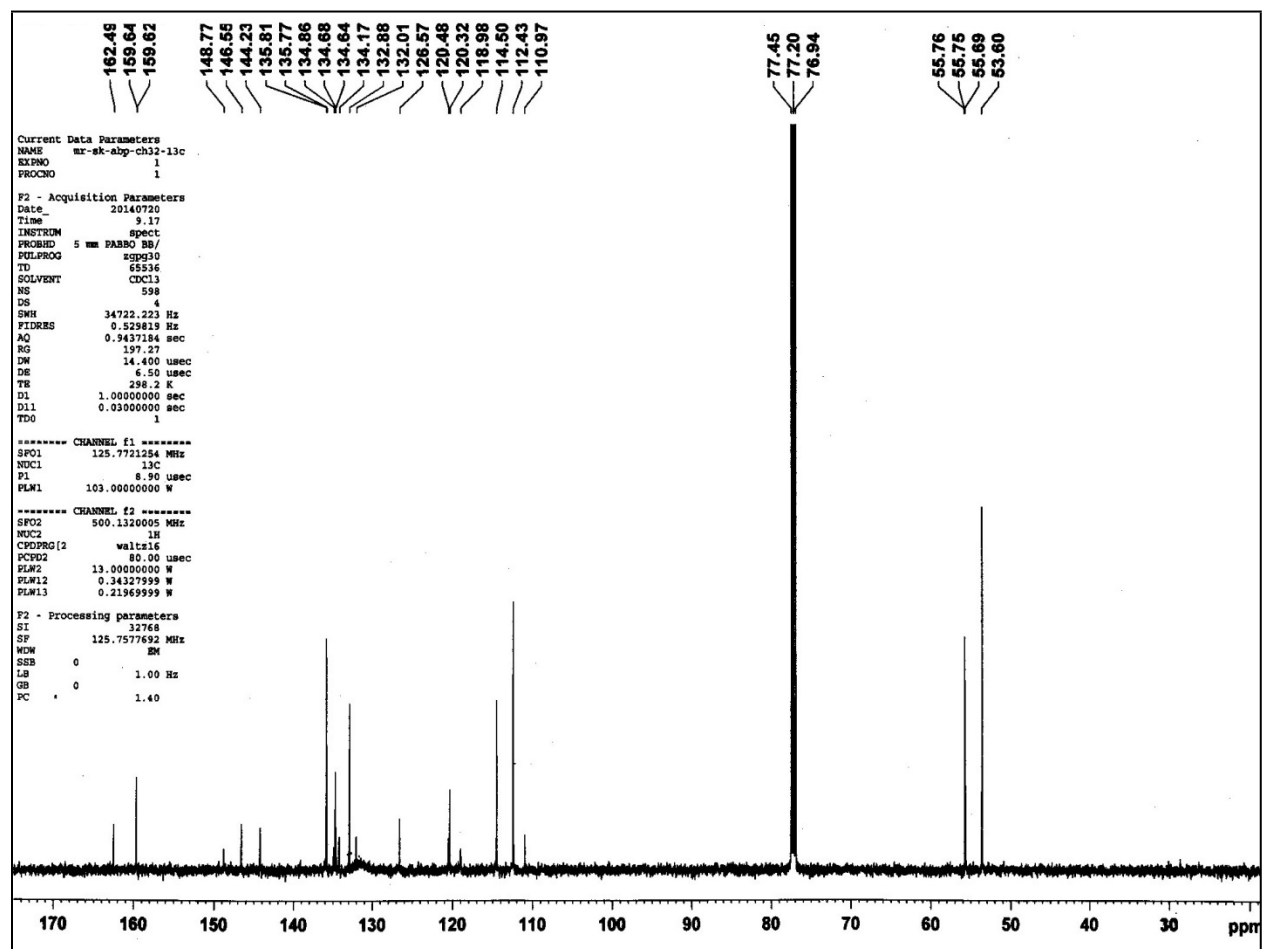

Figure S10: <sup>13</sup>C NMR spectrum of compound 2 recorded in CDCl<sub>3</sub>

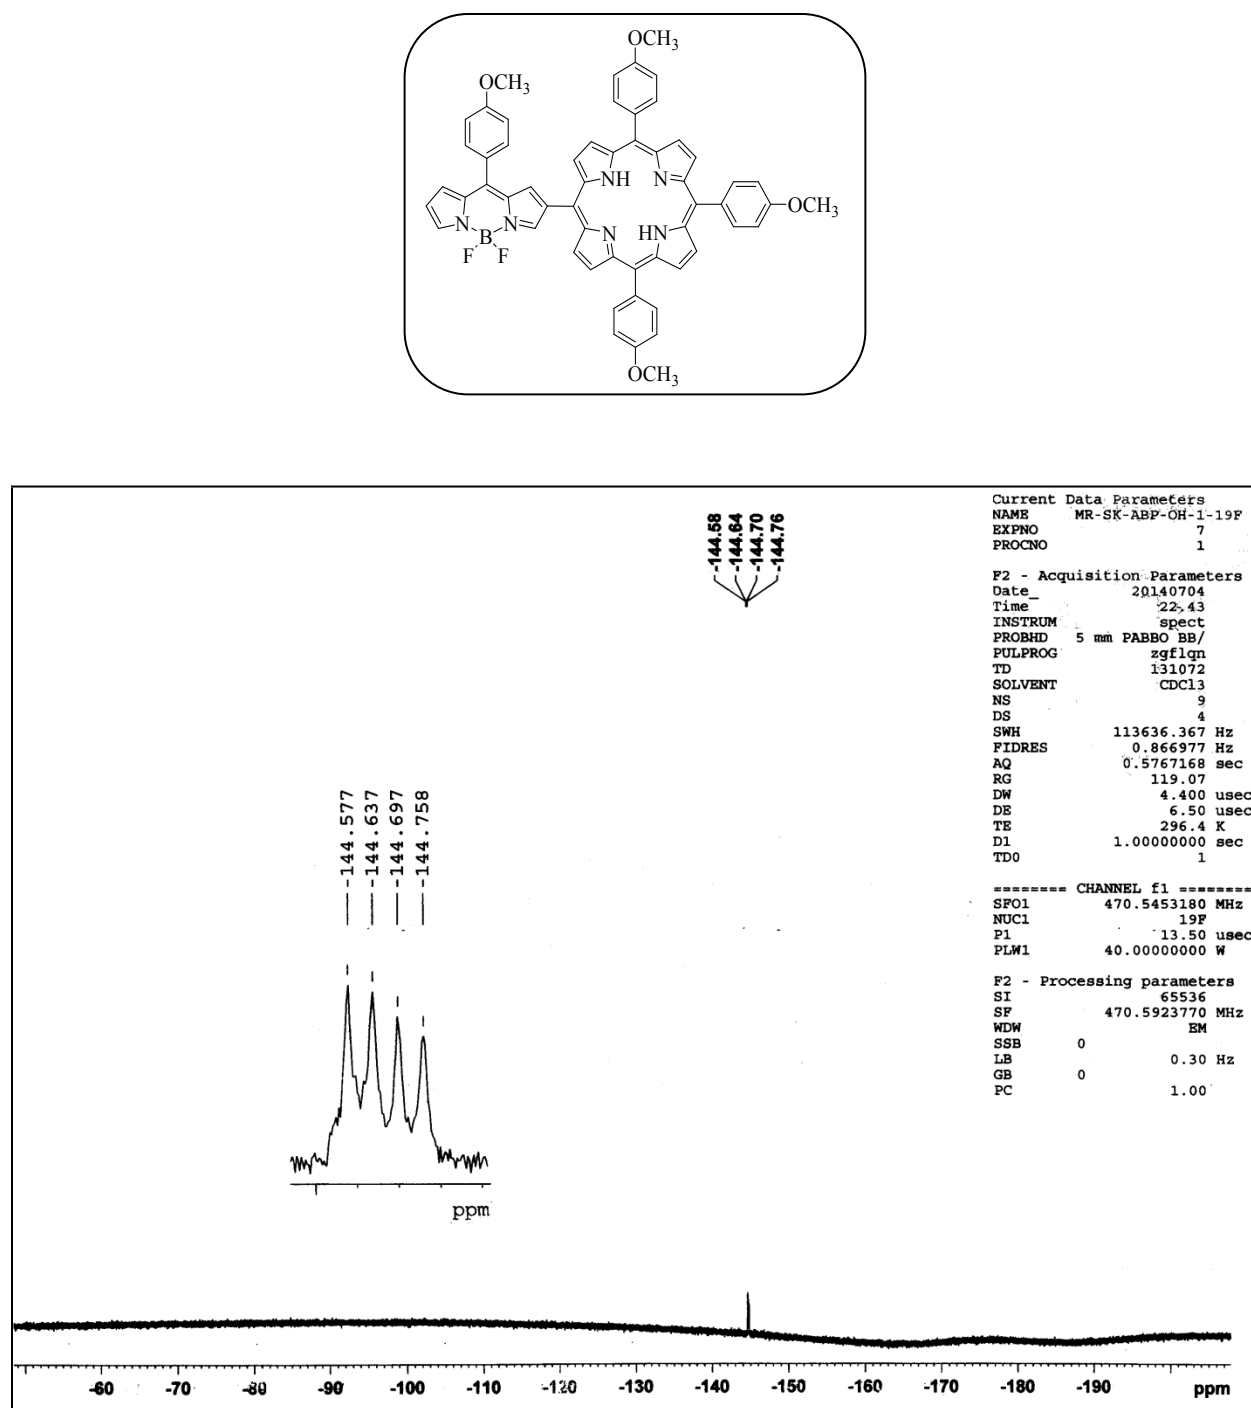

**Figure S11:**  $^{19}\text{F}$  NMR spectrum of compound **2** recorded in  $\text{CDCl}_3$ . Inset shows the expansion

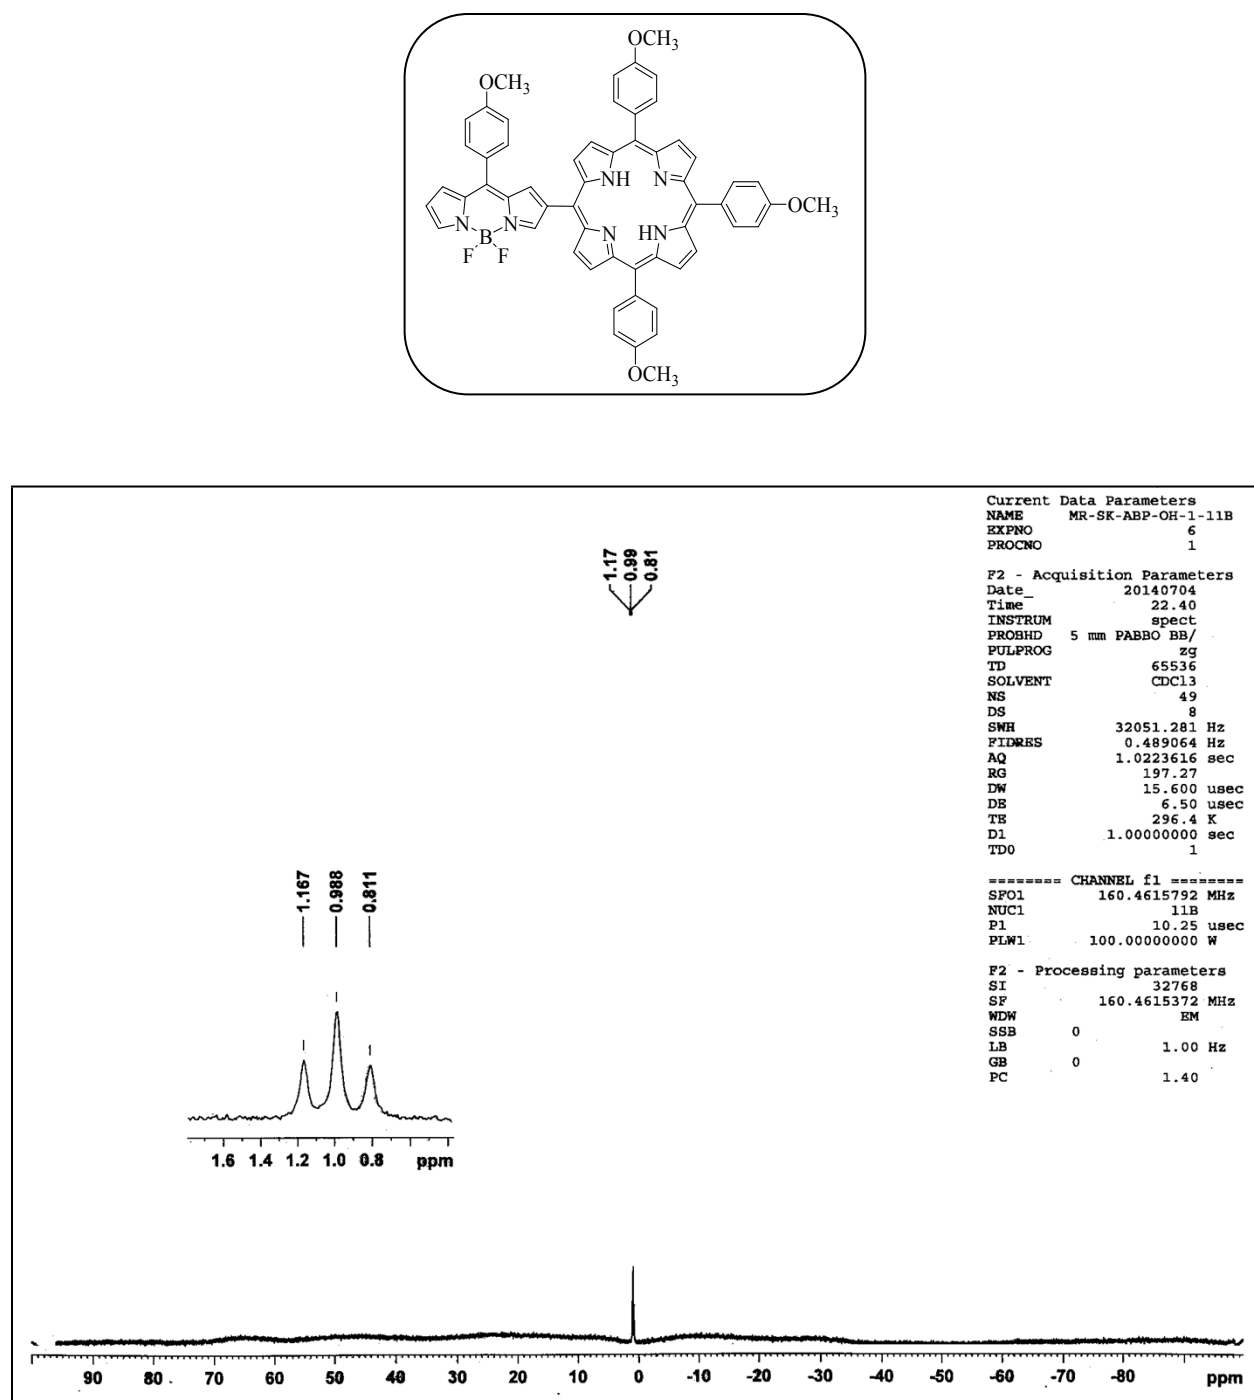

**Figure S12:**  $^{11}\text{B}$  NMR spectrum of compound **2** recorded in  $\text{CDCl}_3$ . Inset shows the expansion

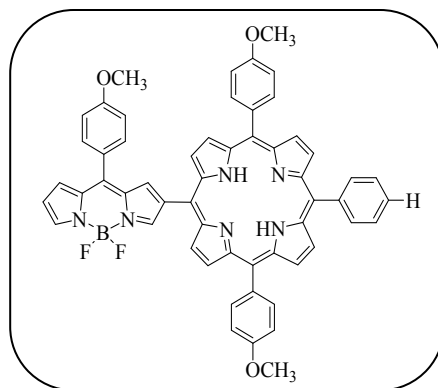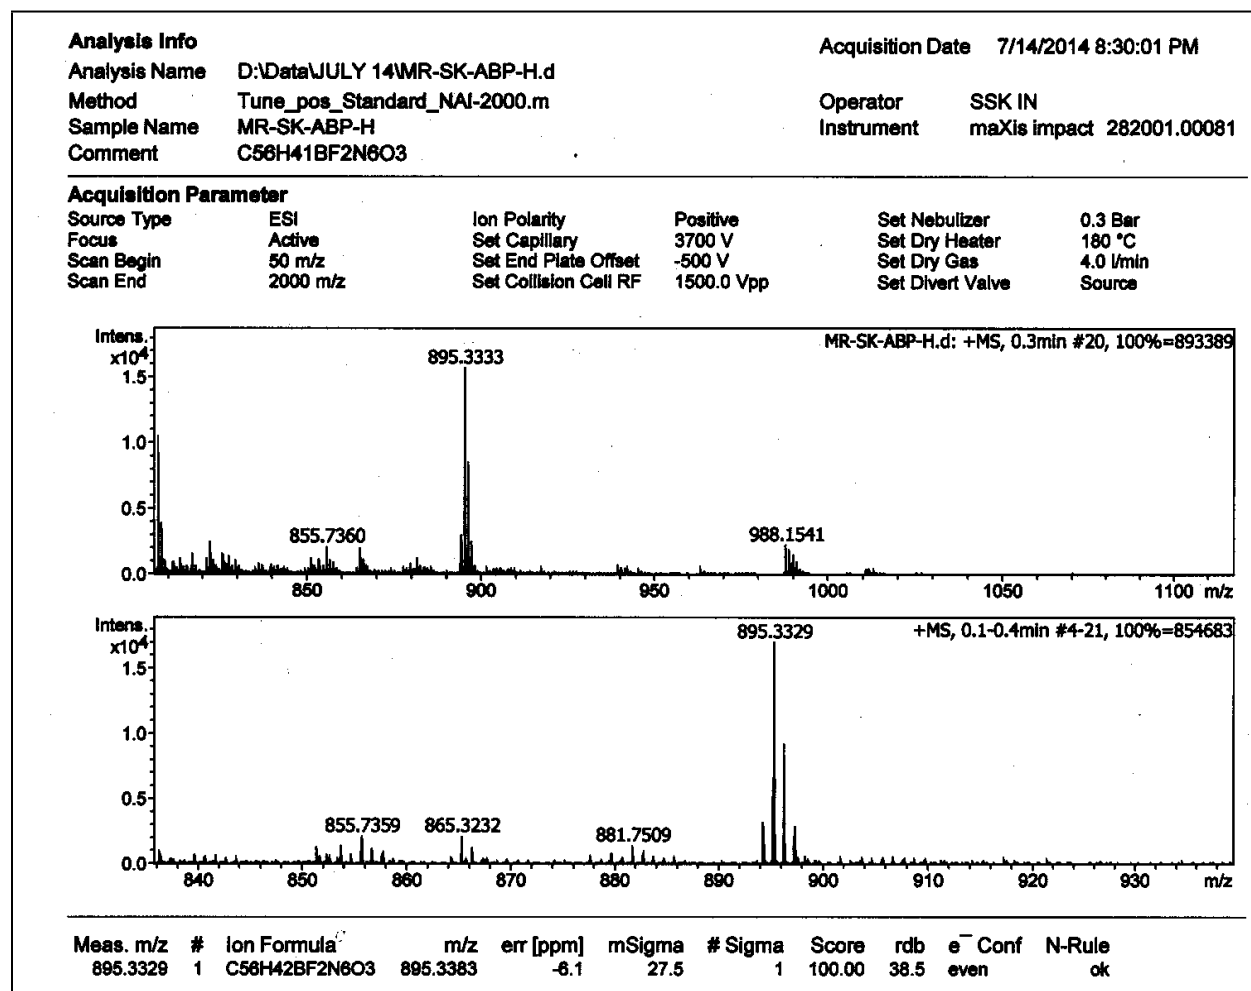

Figure S13: HR mass spectrum of compound 3

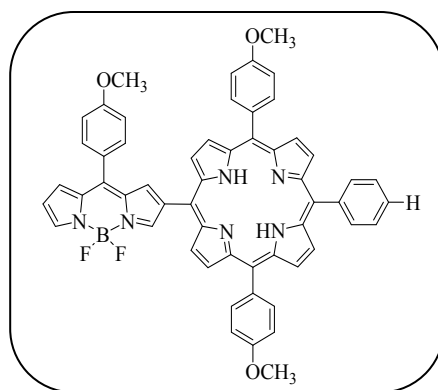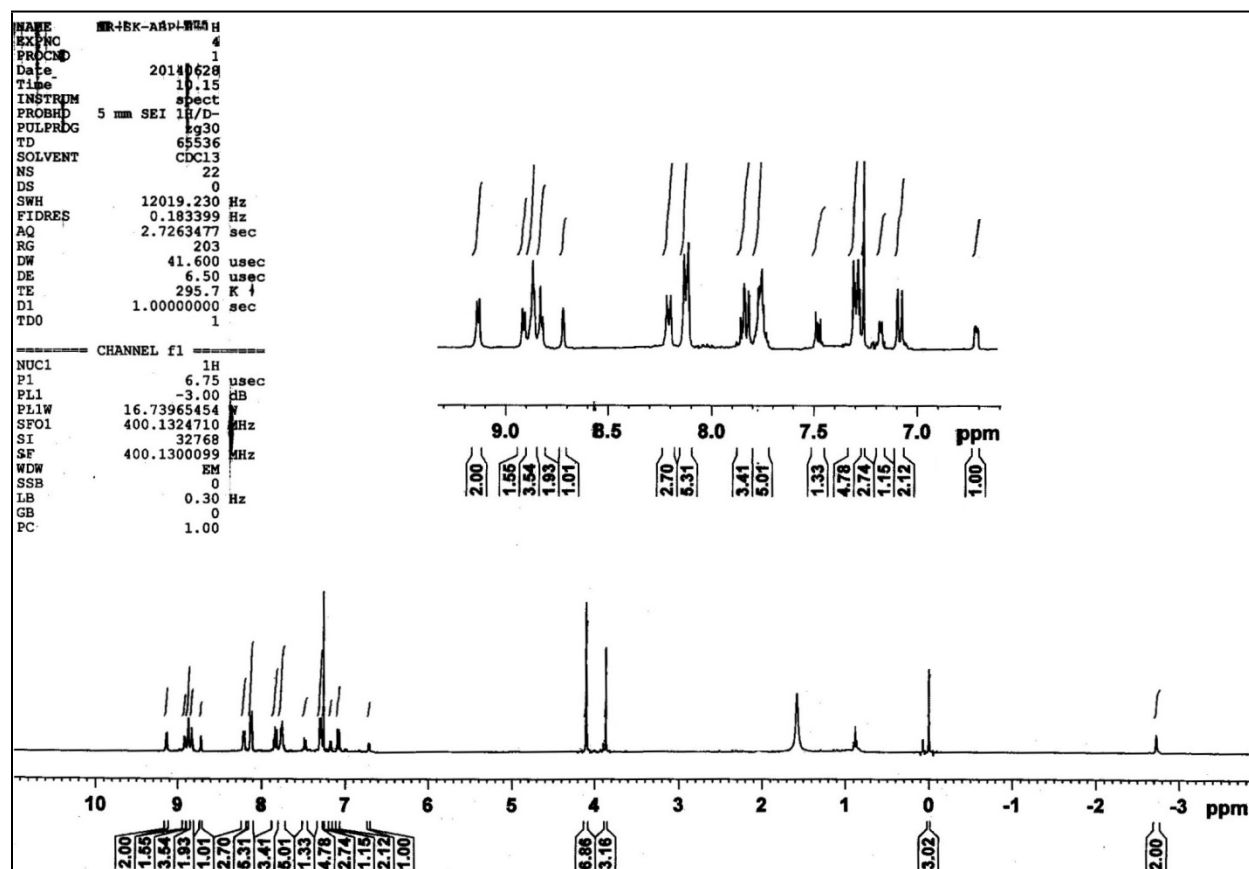

Figure S14:  $^1\text{H}$  NMR spectrum of compound 3 recorded in  $\text{CDCl}_3$

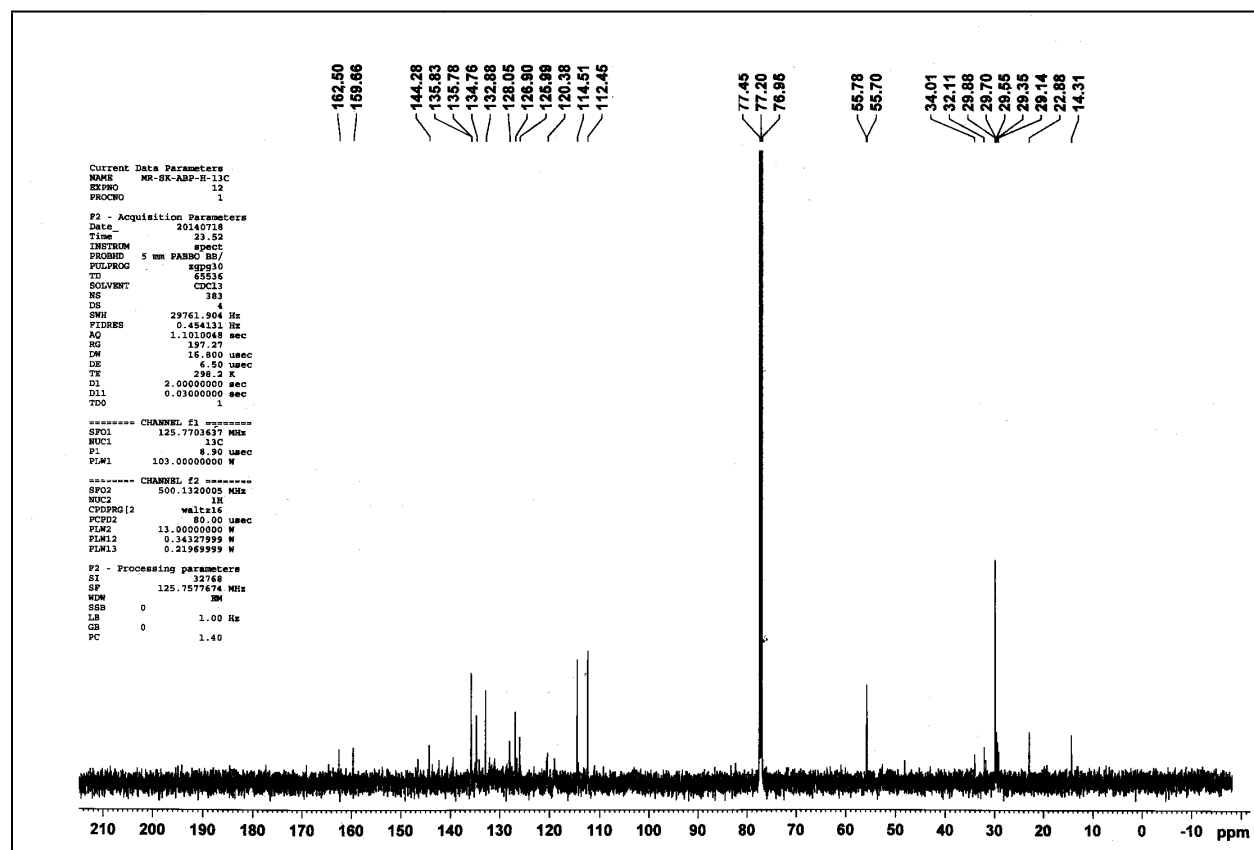

Figure S15:  $^{13}\text{C}$  NMR spectrum of compound **3** recorded in  $\text{CDCl}_3$

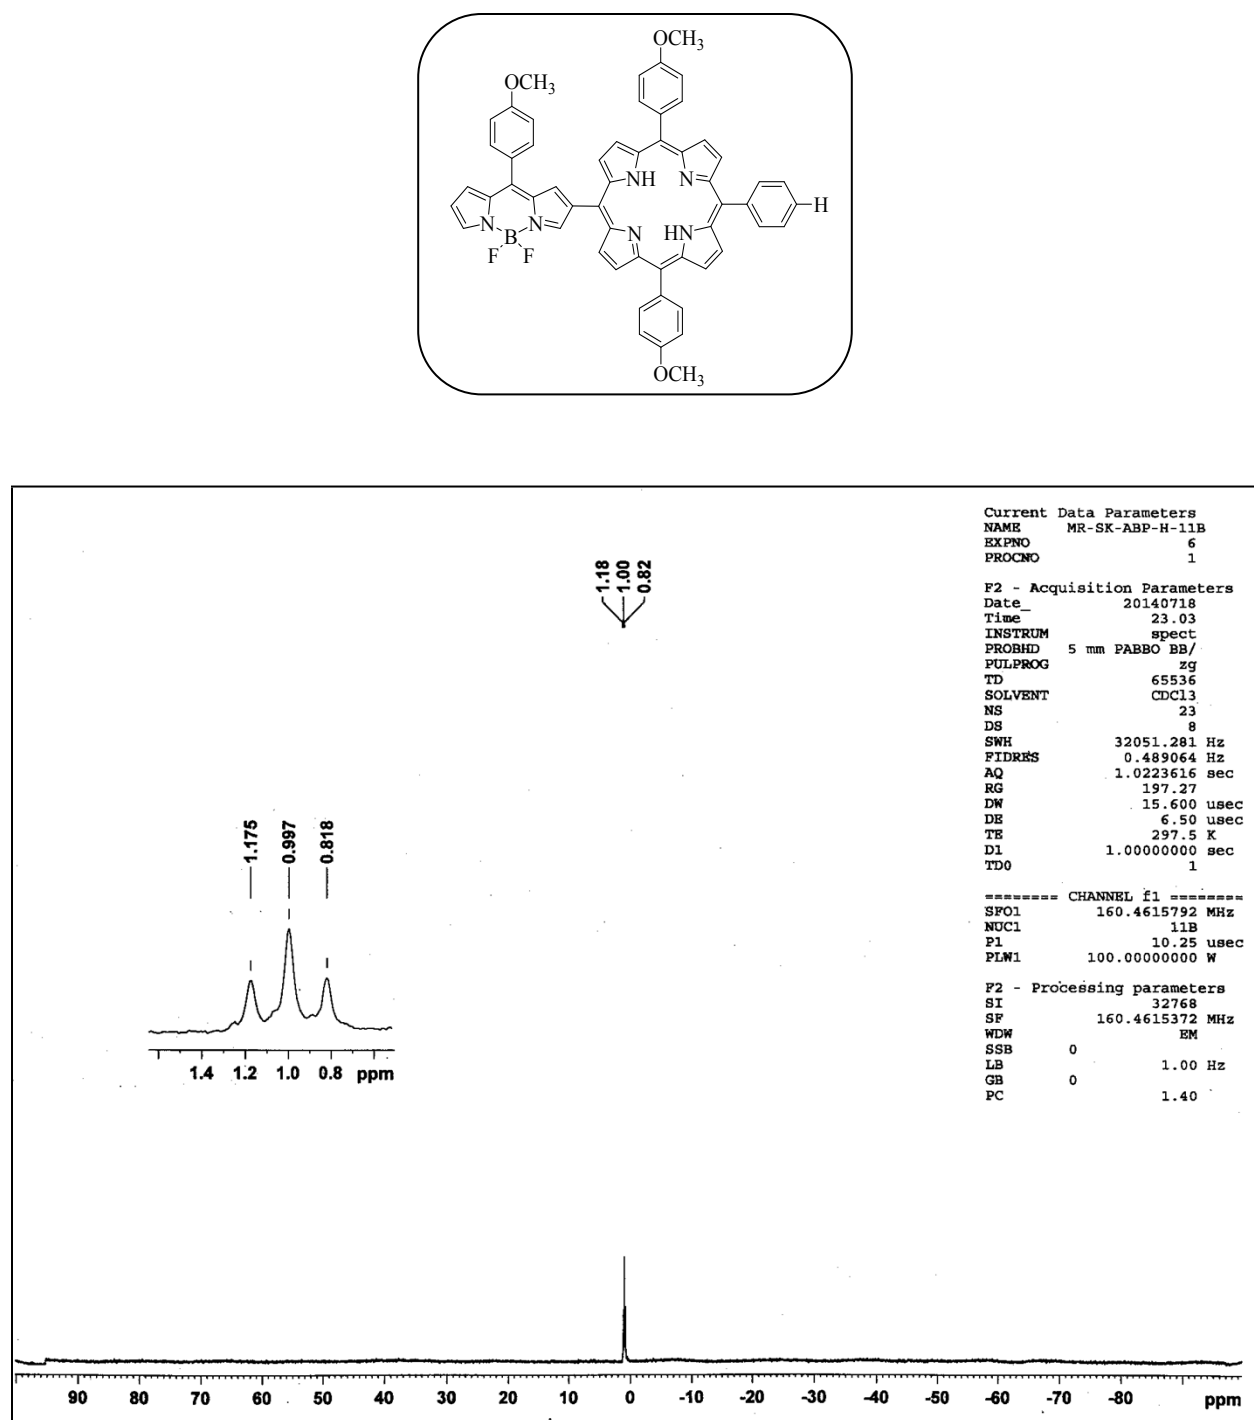

**Figure S16:**  $^{11}\text{B}$  NMR spectrum of compound **3** recorded in  $\text{CDCl}_3$ . Inset shows the expansion

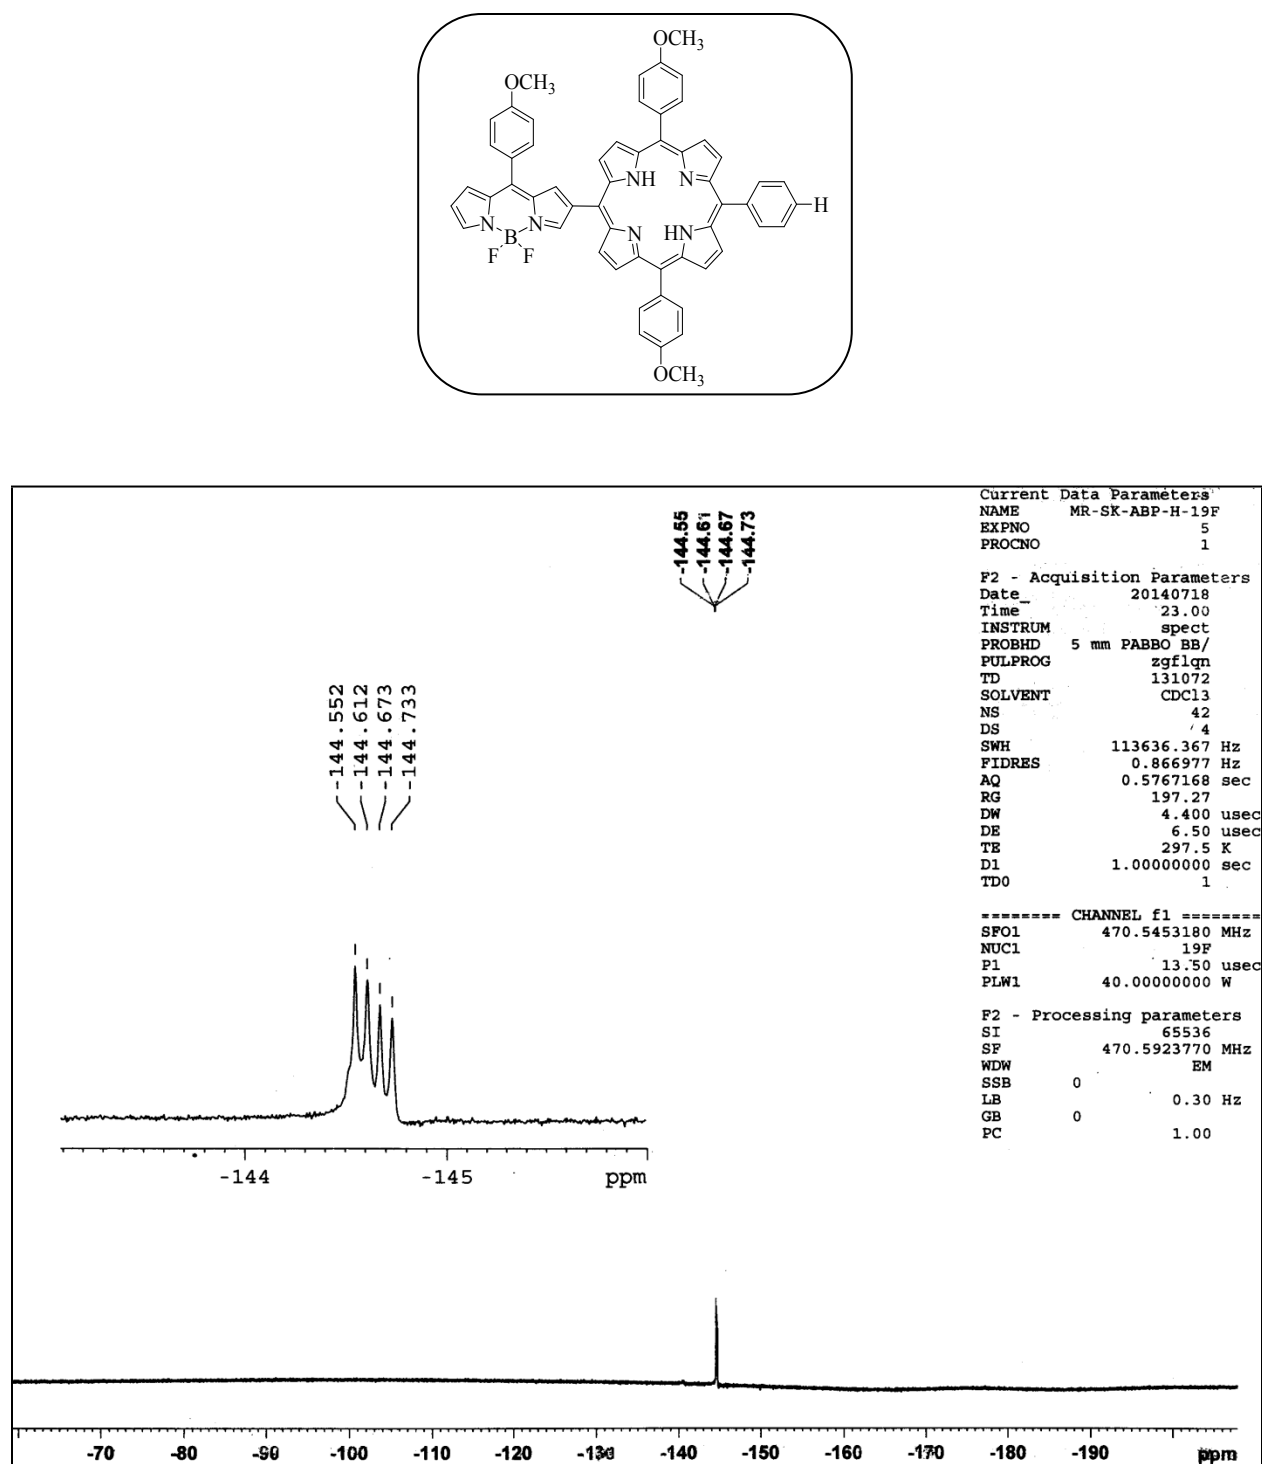

**Figure S17:**  $^{19}\text{F}$  NMR spectrum of compound **3** recorded in  $\text{CDCl}_3$ . Inset shows the expansion

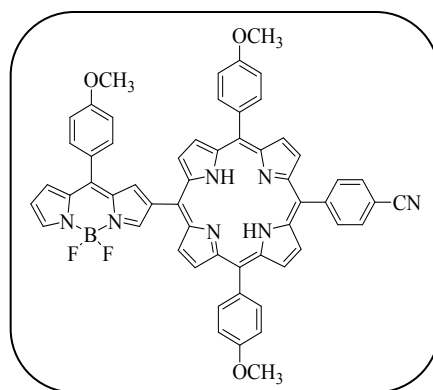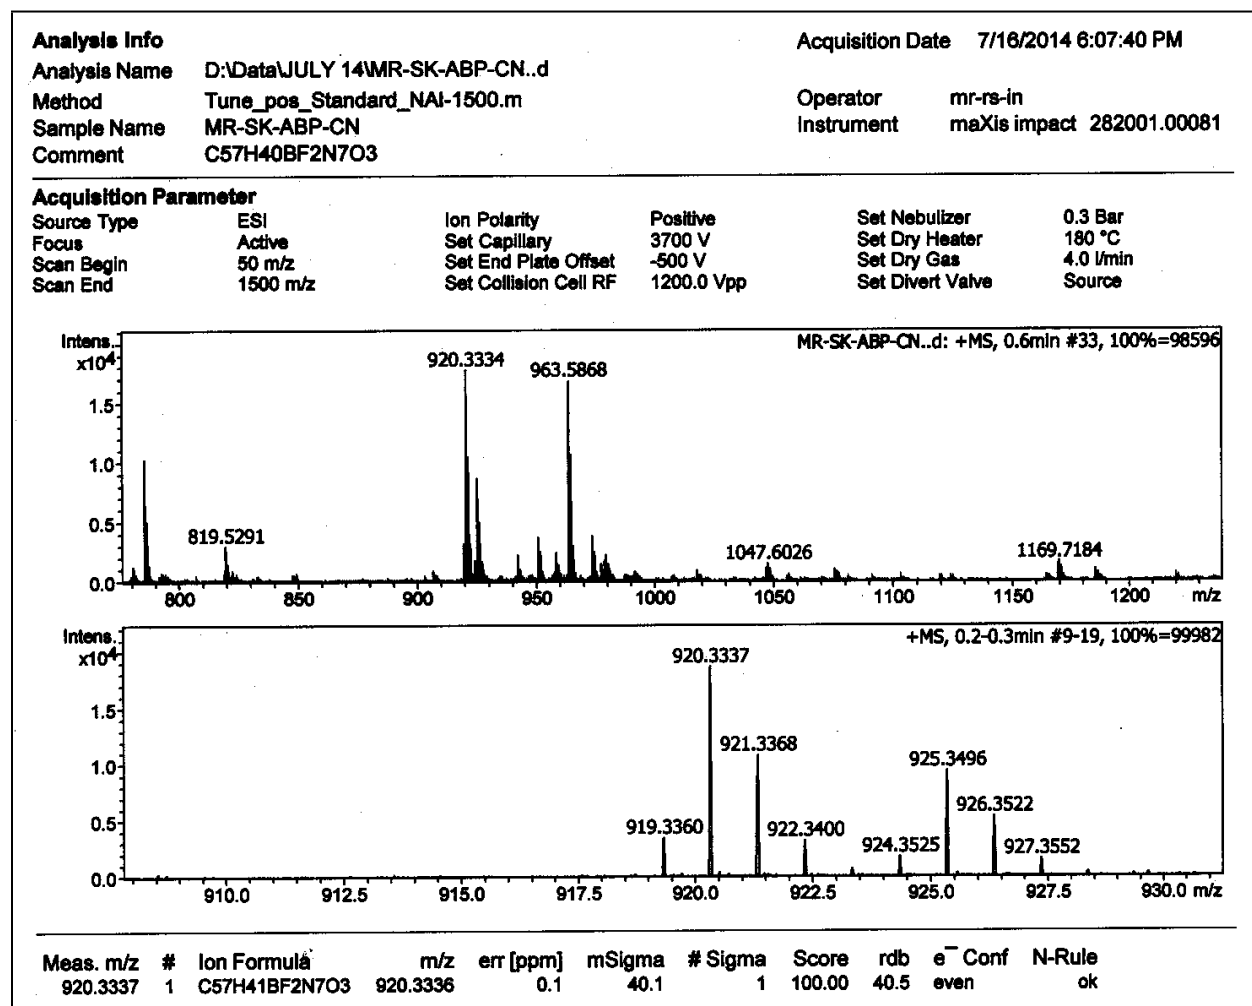

Figure S18: HR mass spectrum of compound 4

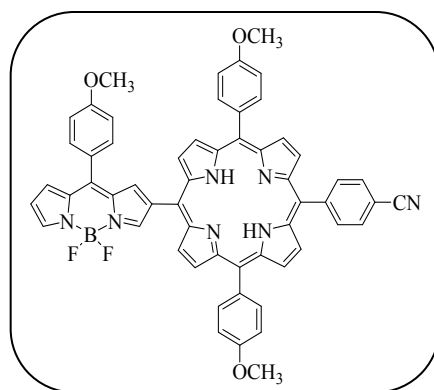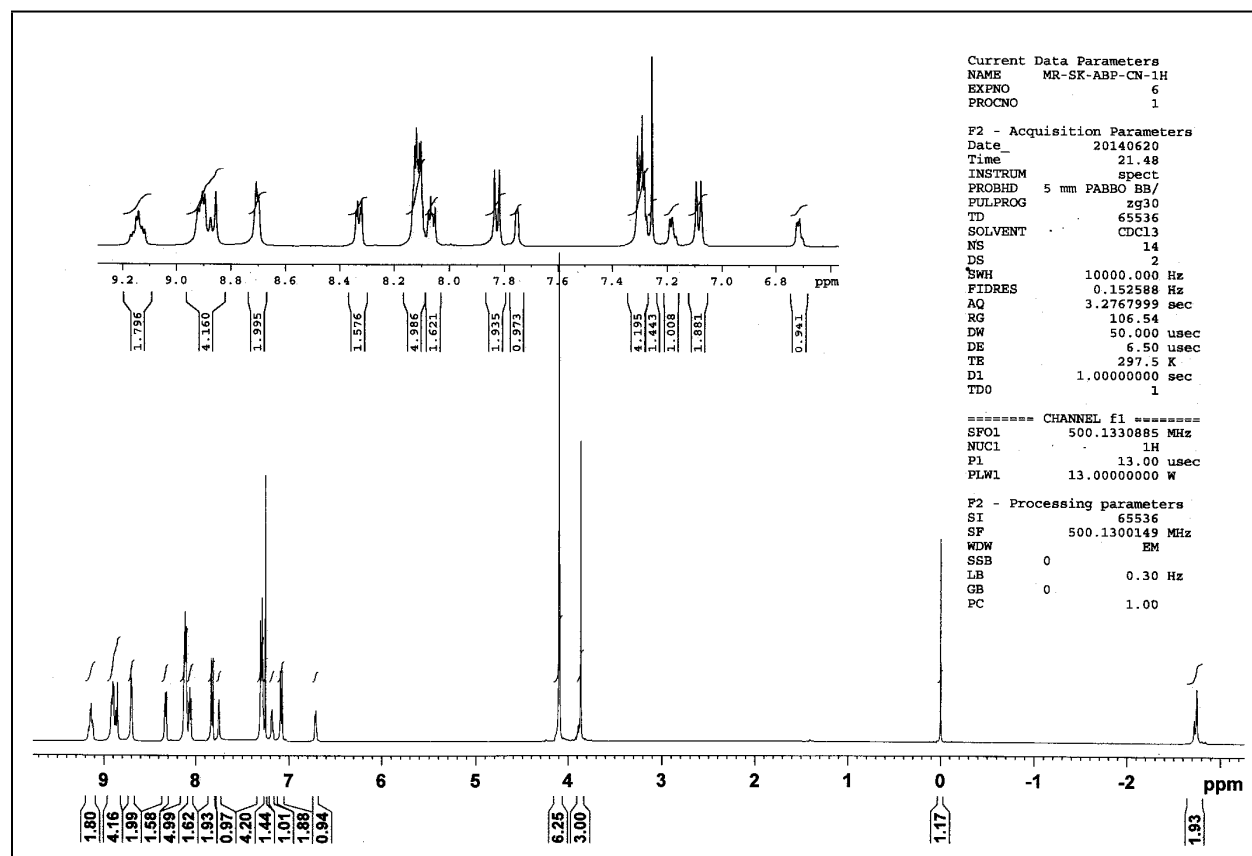

**Figure S19:**  $^1\text{H}$  NMR spectrum of compound **4** recorded in  $\text{CDCl}_3$

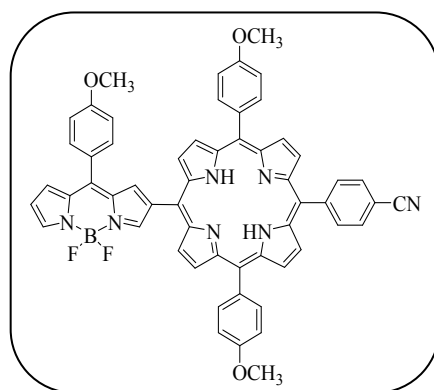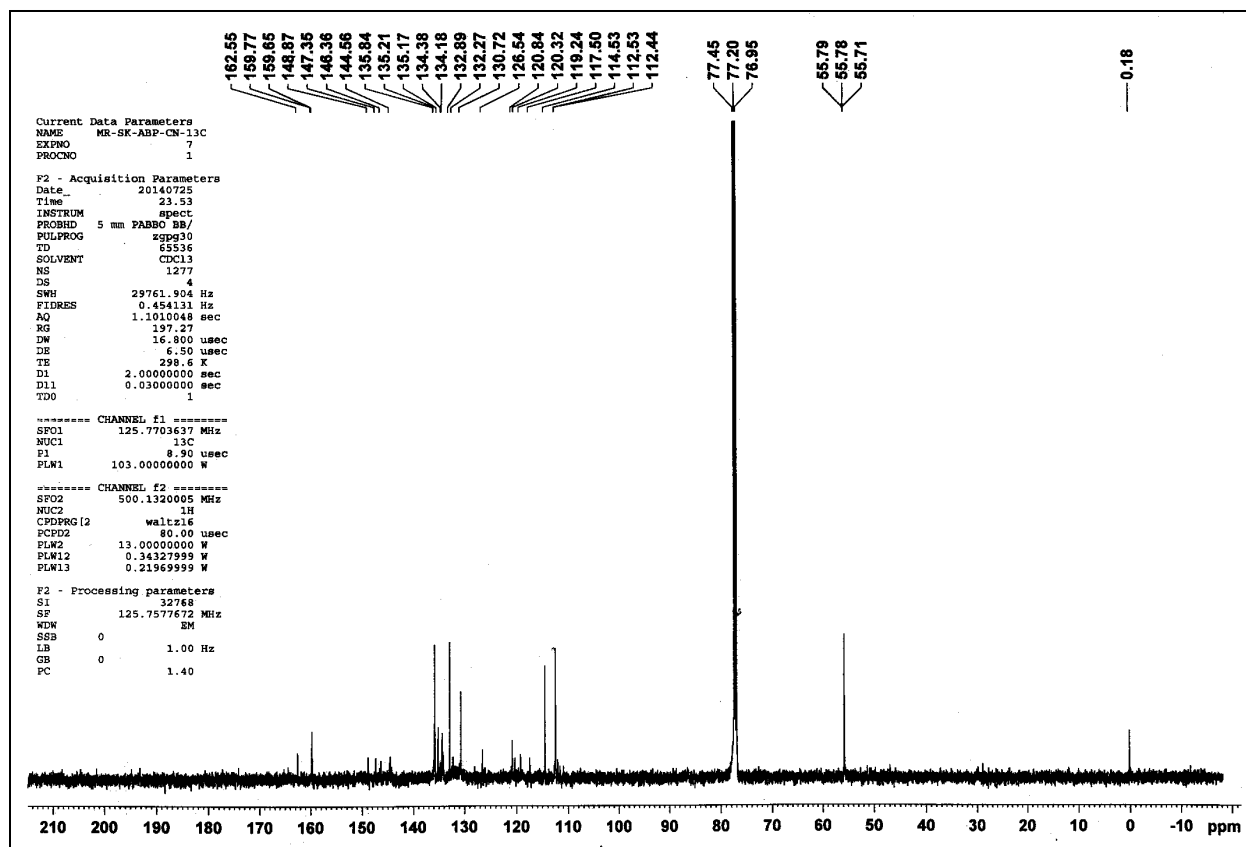

Figure S20:  $^{13}\text{C}$  NMR spectrum of compound 4 recorded in  $\text{CDCl}_3$

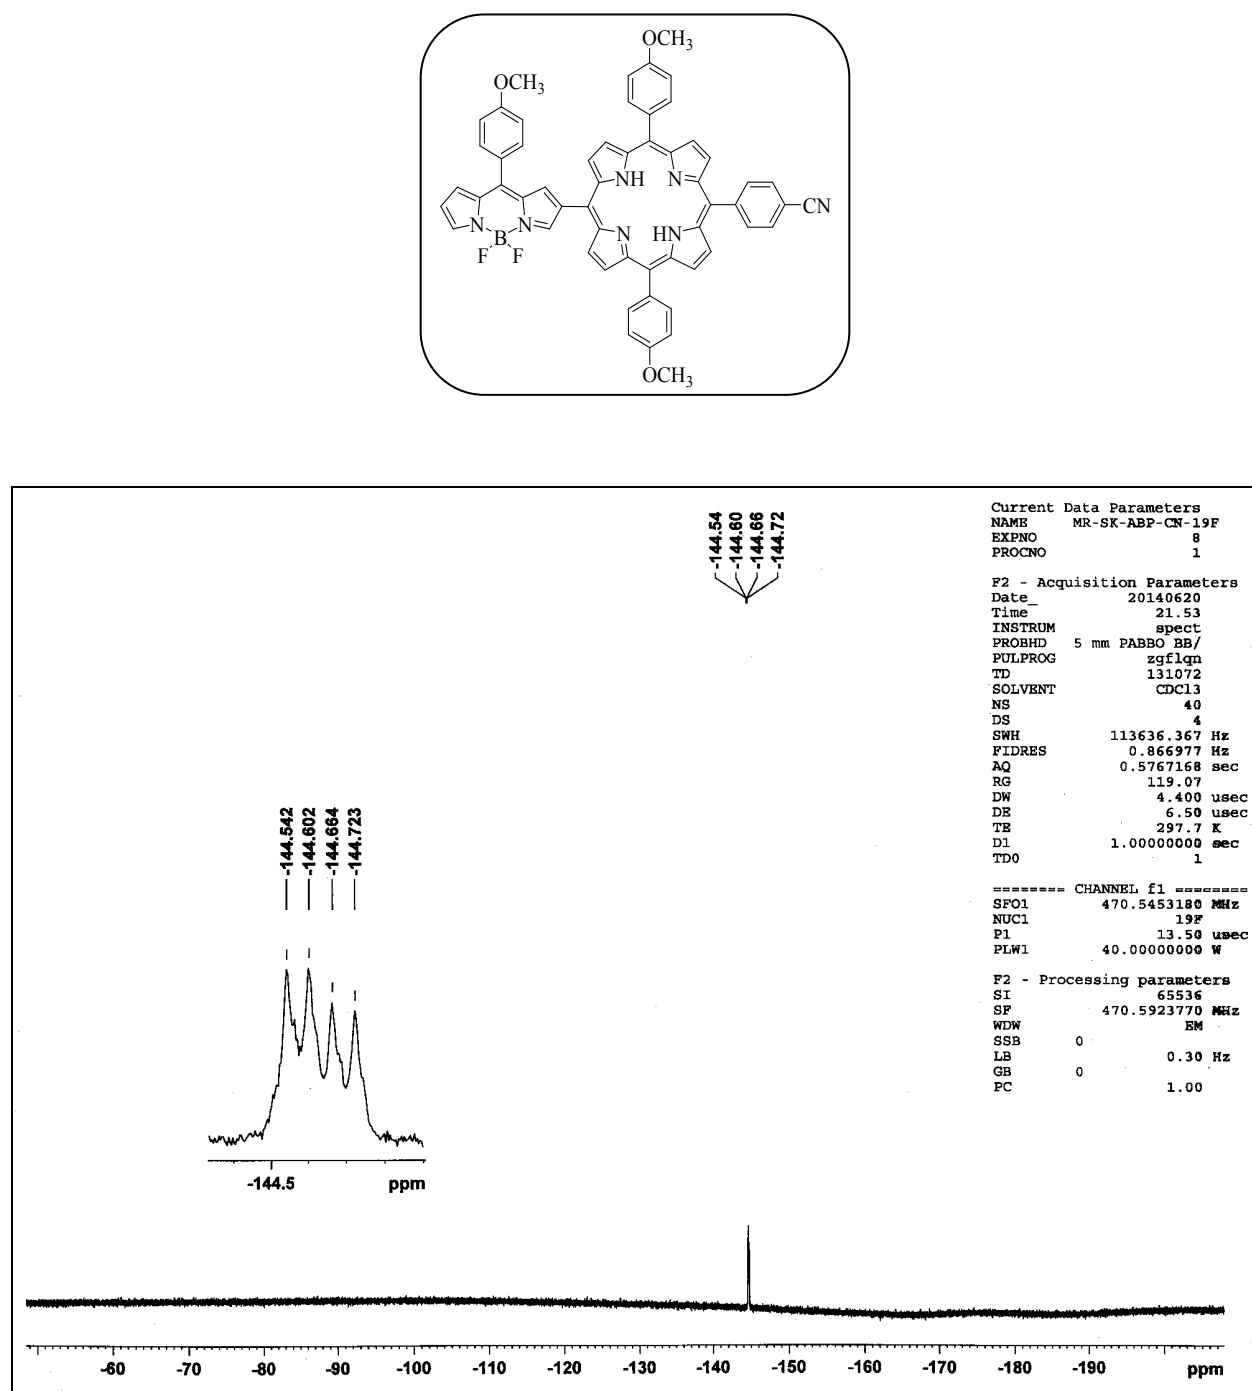

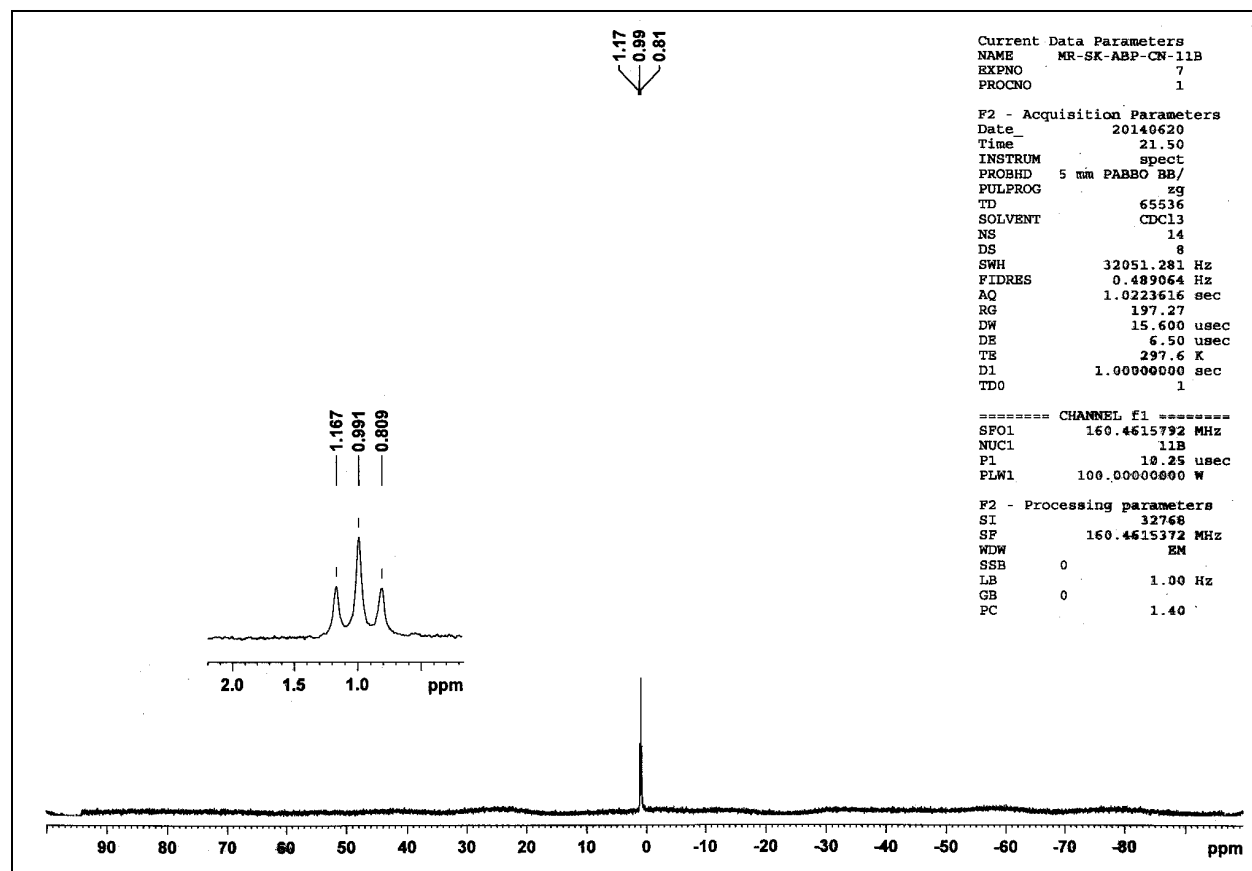

**Figure S22:**  $^{11}\text{B}$  NMR spectrum of compound **4** recorded in  $\text{CDCl}_3$ . Inset shows the expansion

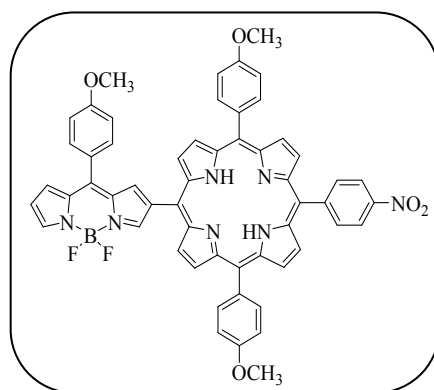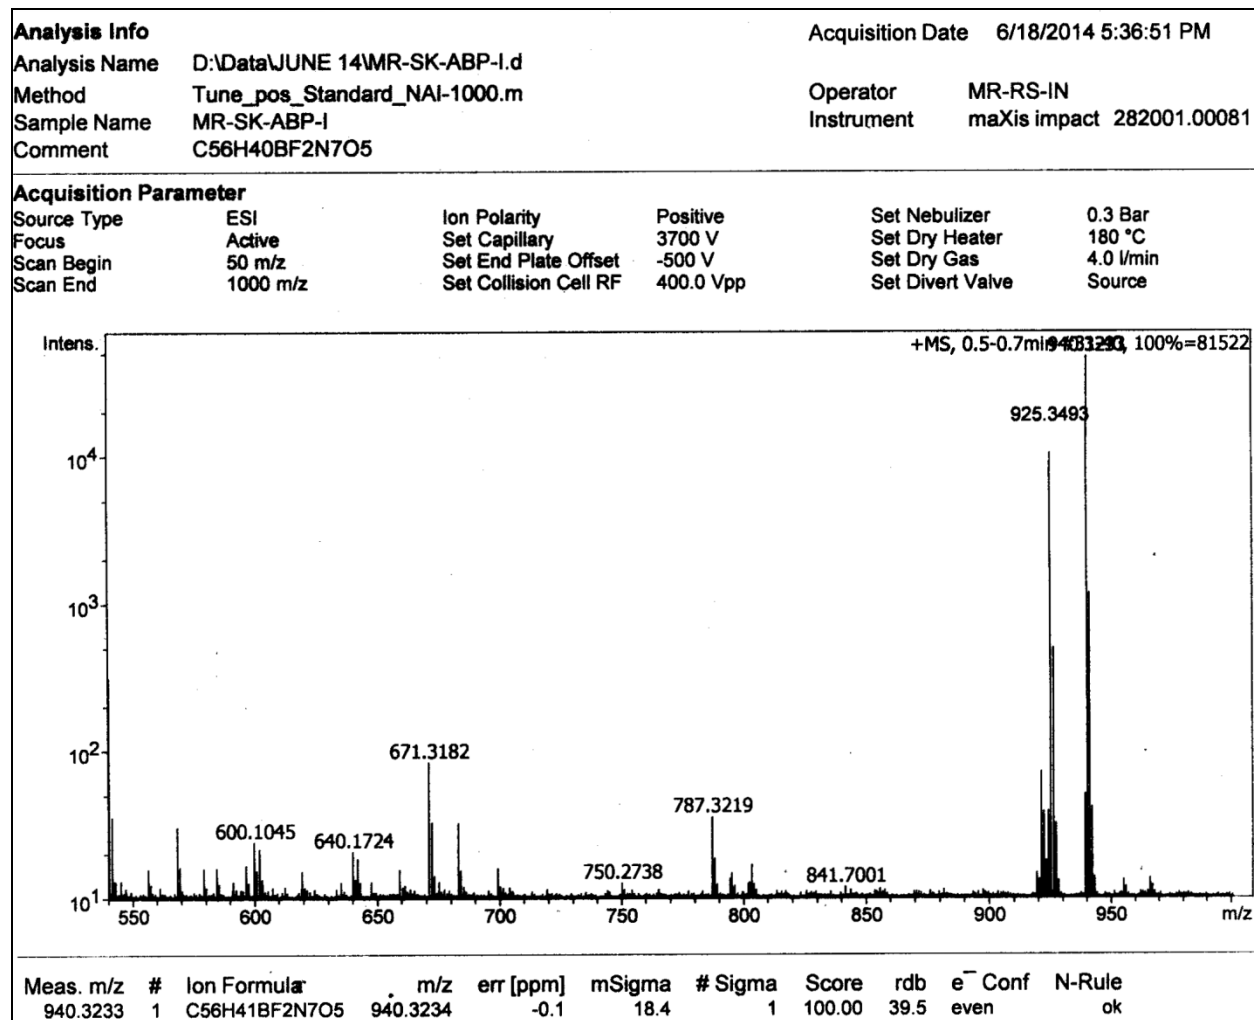

Figure S23: HR mass spectrum of compound 5

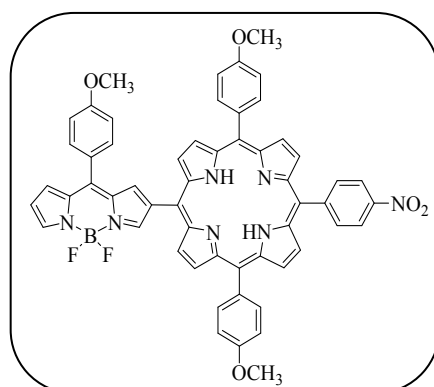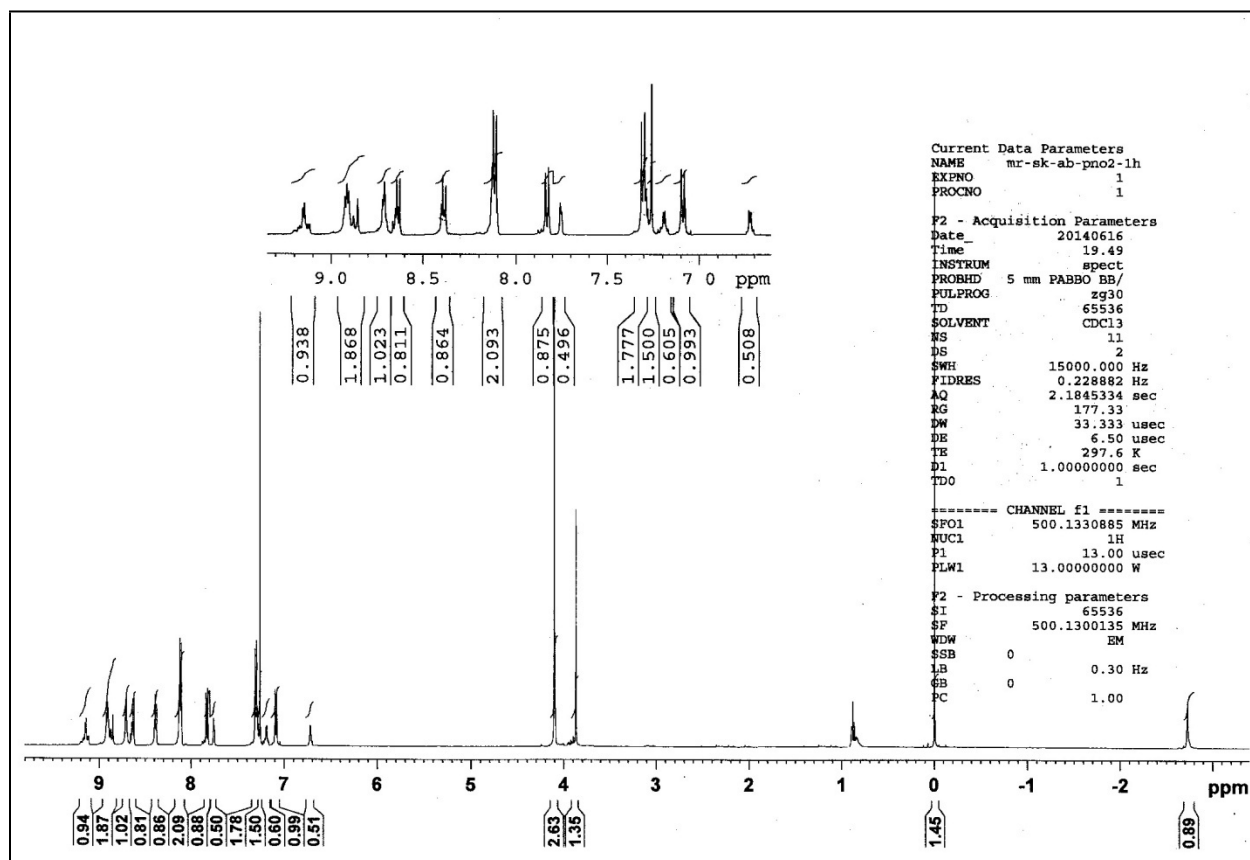

Figure S24:  $^1\text{H}$  NMR spectrum of compound **5** recorded in  $\text{CDCl}_3$

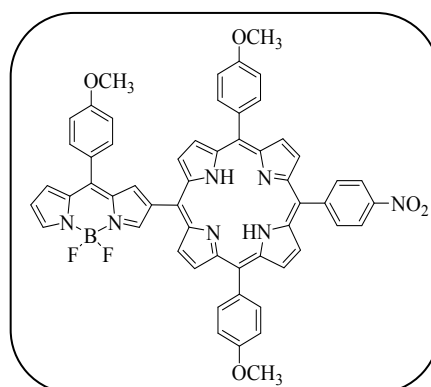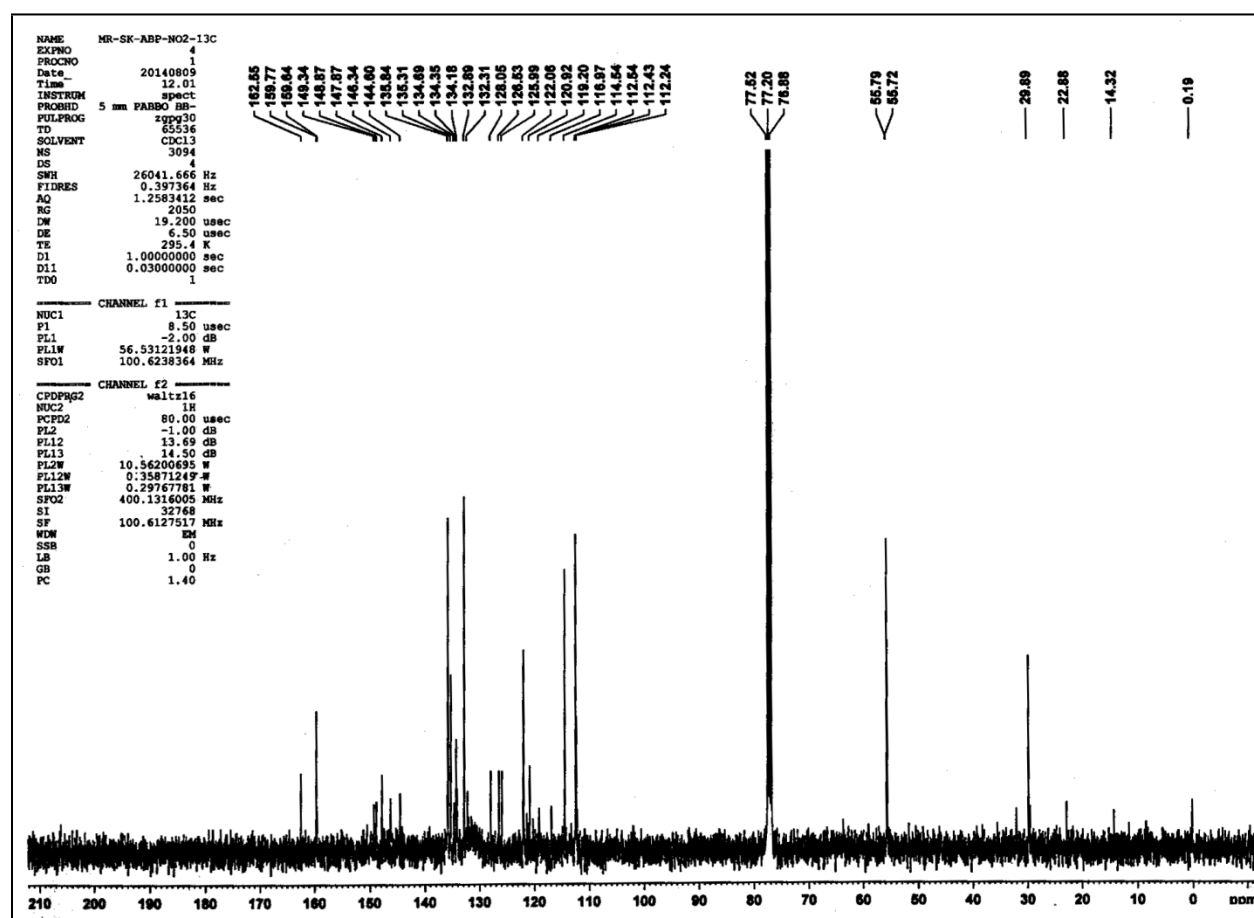

Figure S25:  $^{13}\text{C}$  NMR spectrum of compound **5** recorded in  $\text{CDCl}_3$

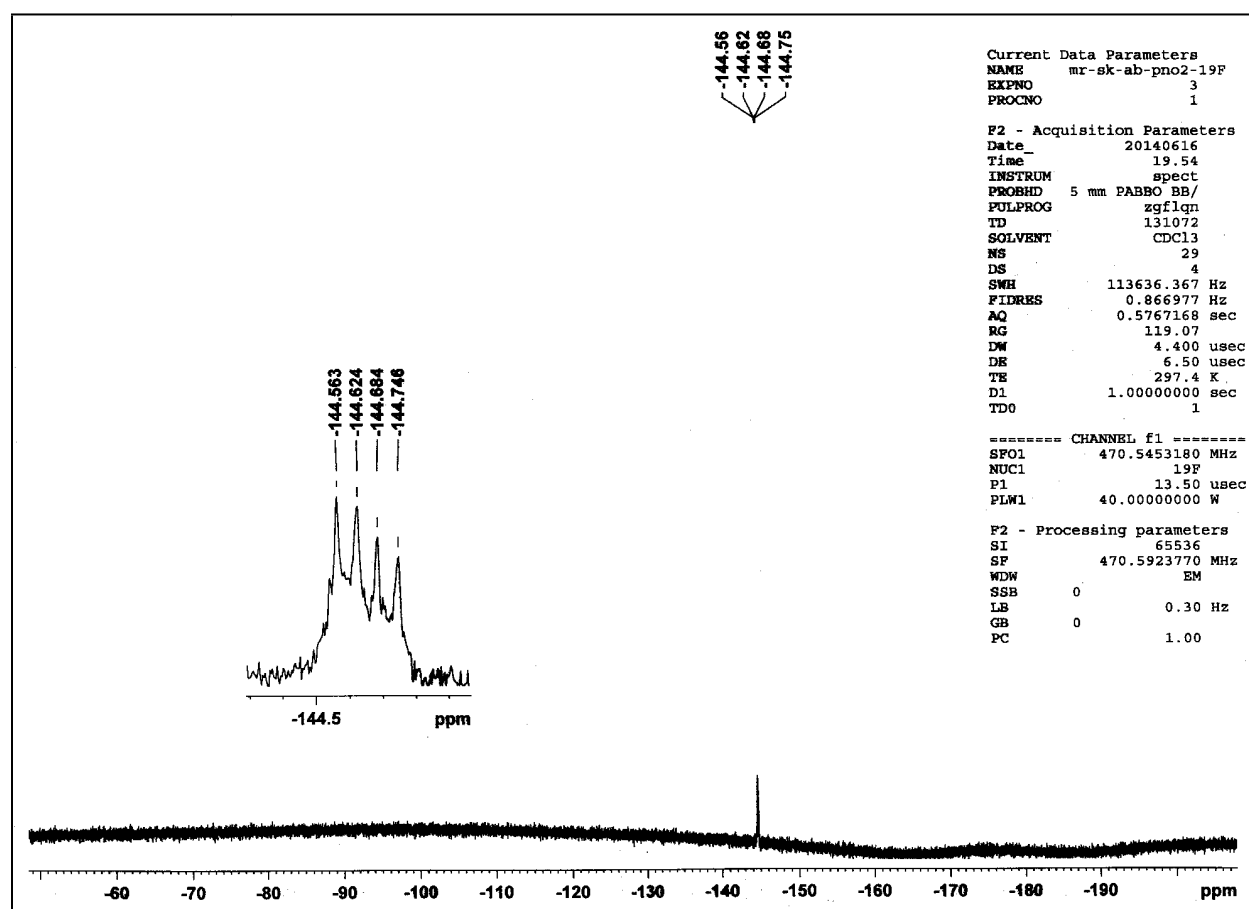

Figure S26:  $^{19}\text{F}$  NMR spectrum of compound **5** recorded in  $\text{CDCl}_3$ . Inset shows the expansion

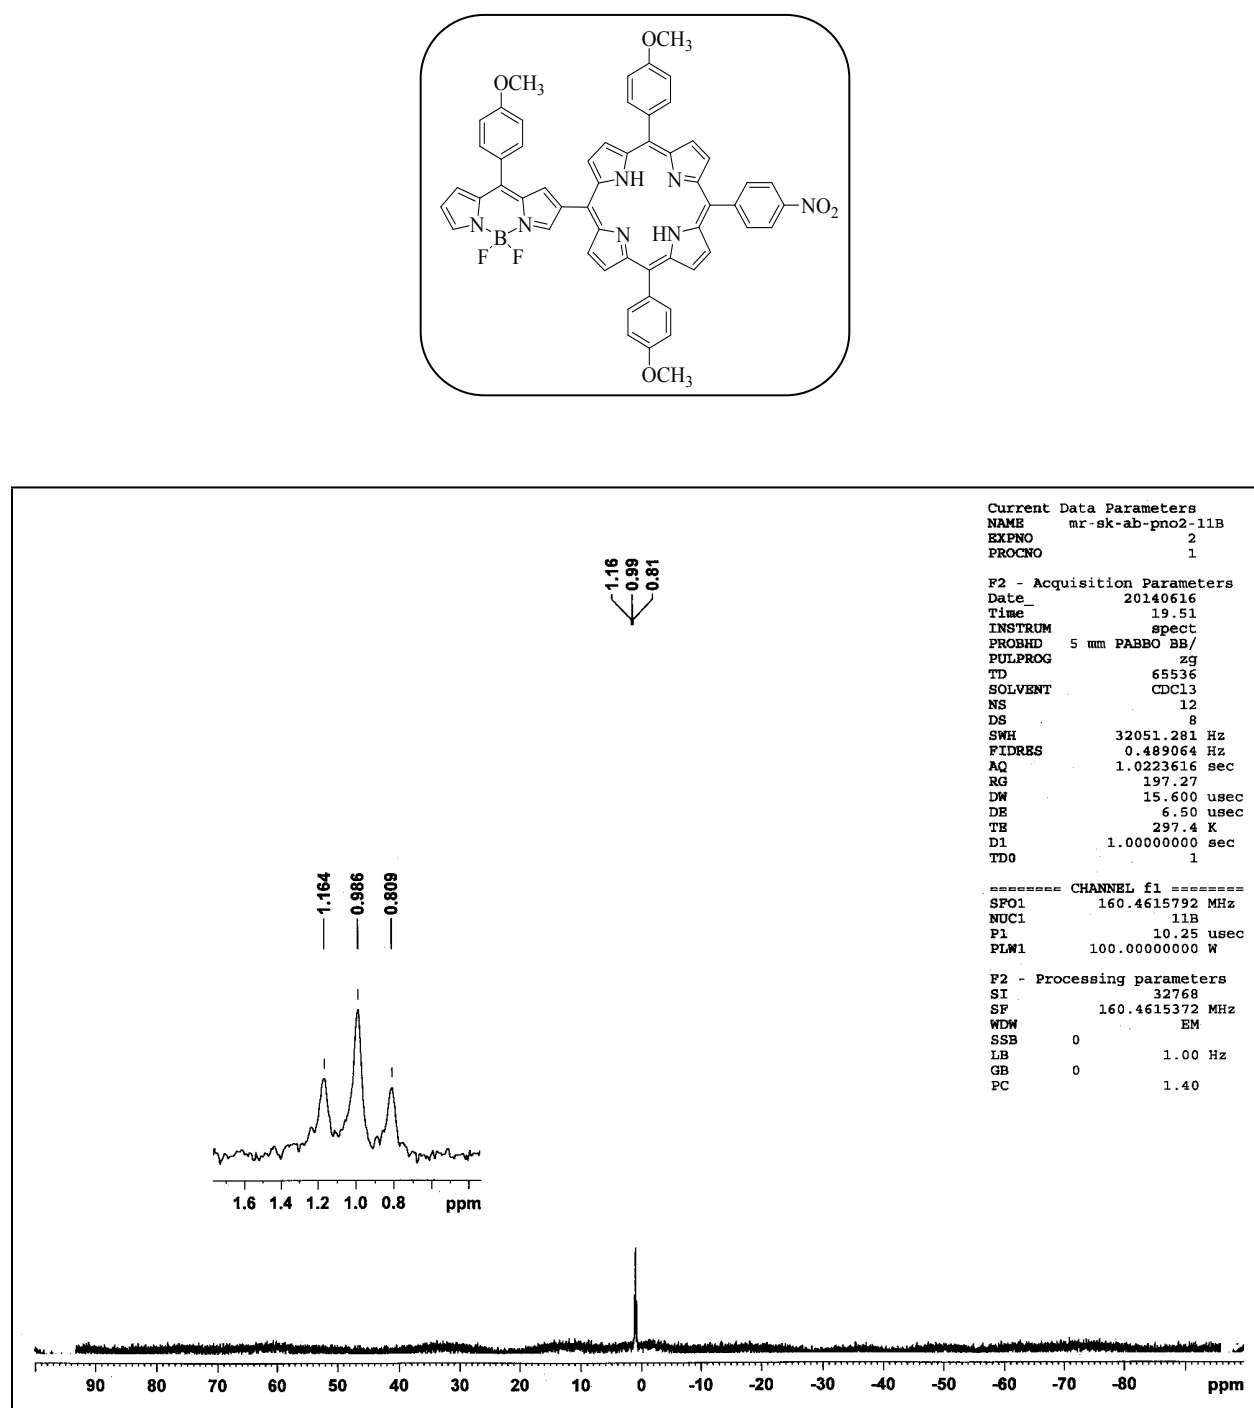

**Figure S27:**  $^{11}\text{B}$  NMR spectrum of compound **5** recorded in  $\text{CDCl}_3$ . Inset shows the expansion

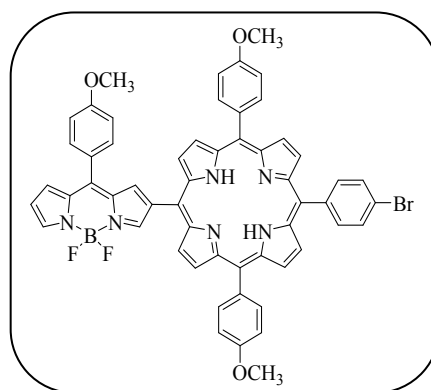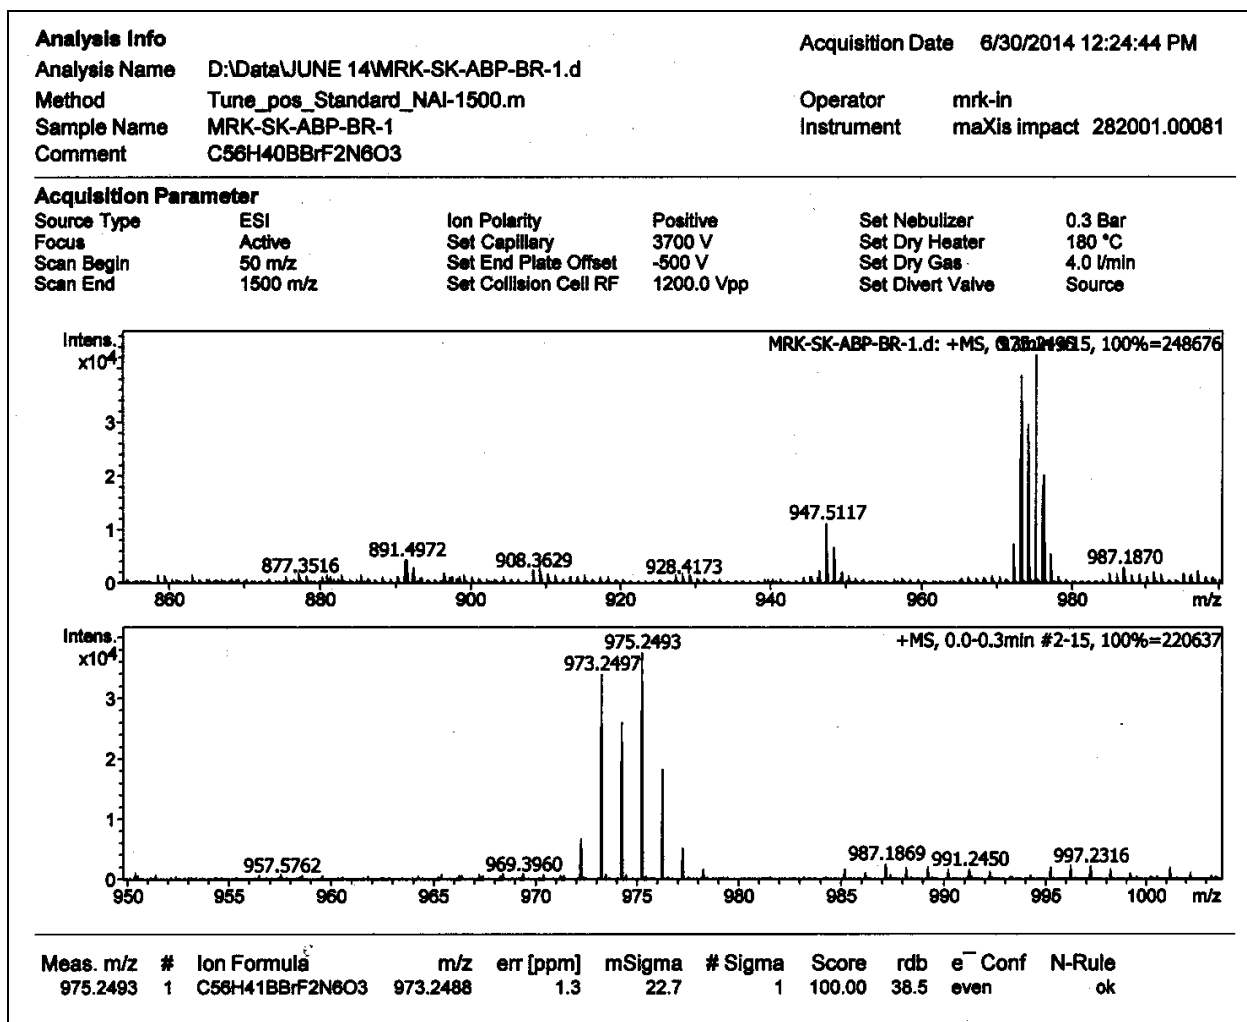

Figure S28: HR mass spectrum of compound 6

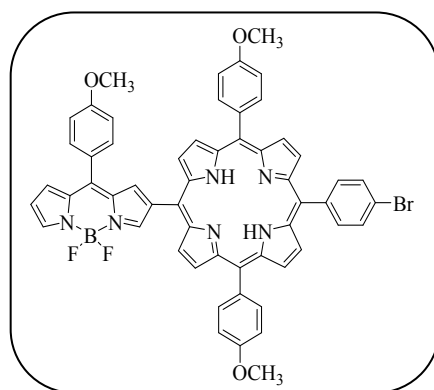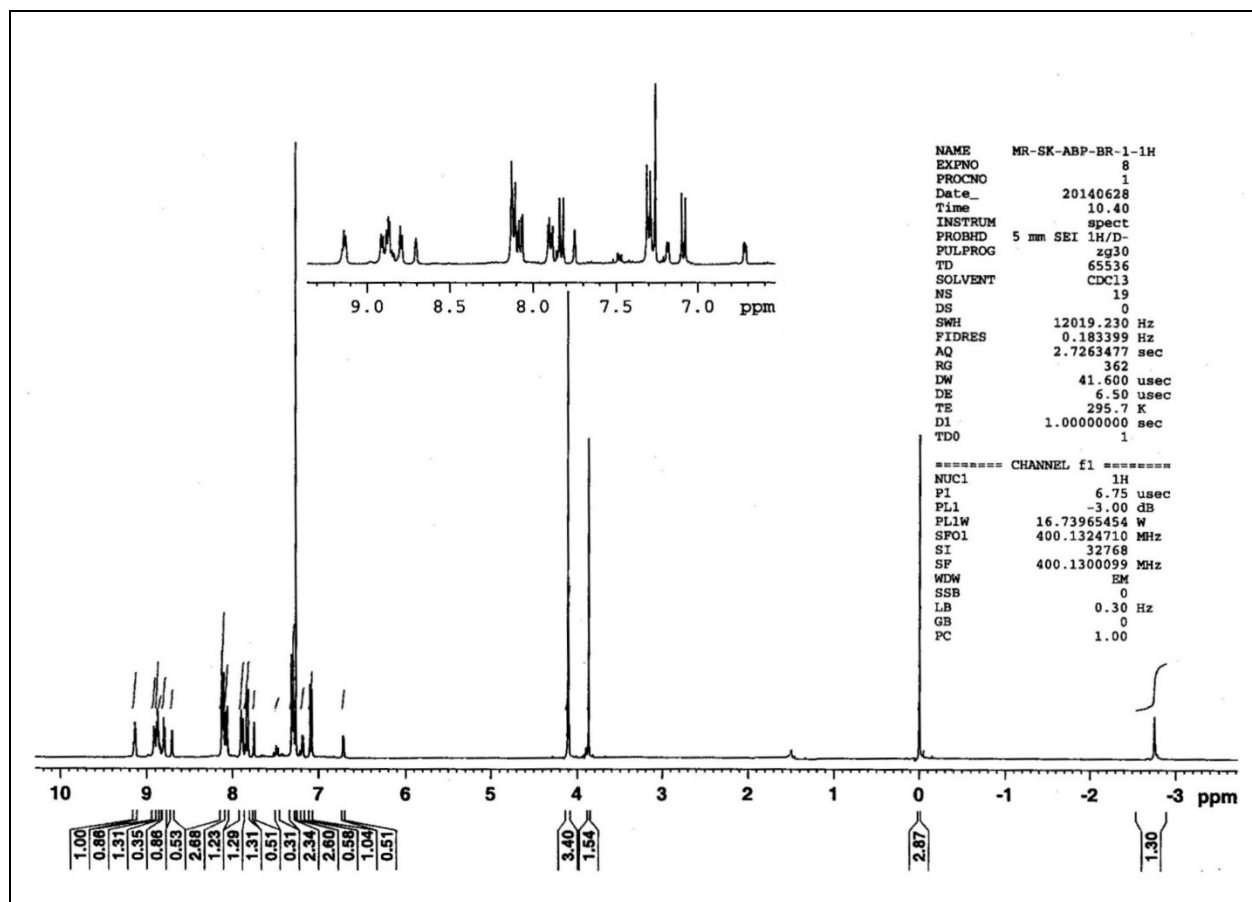

Figure S29: <sup>1</sup>H NMR spectrum of compound 6 recorded in CDCl<sub>3</sub>

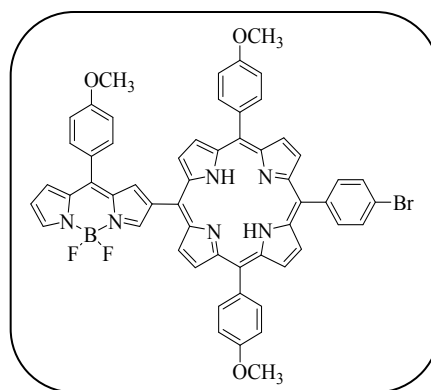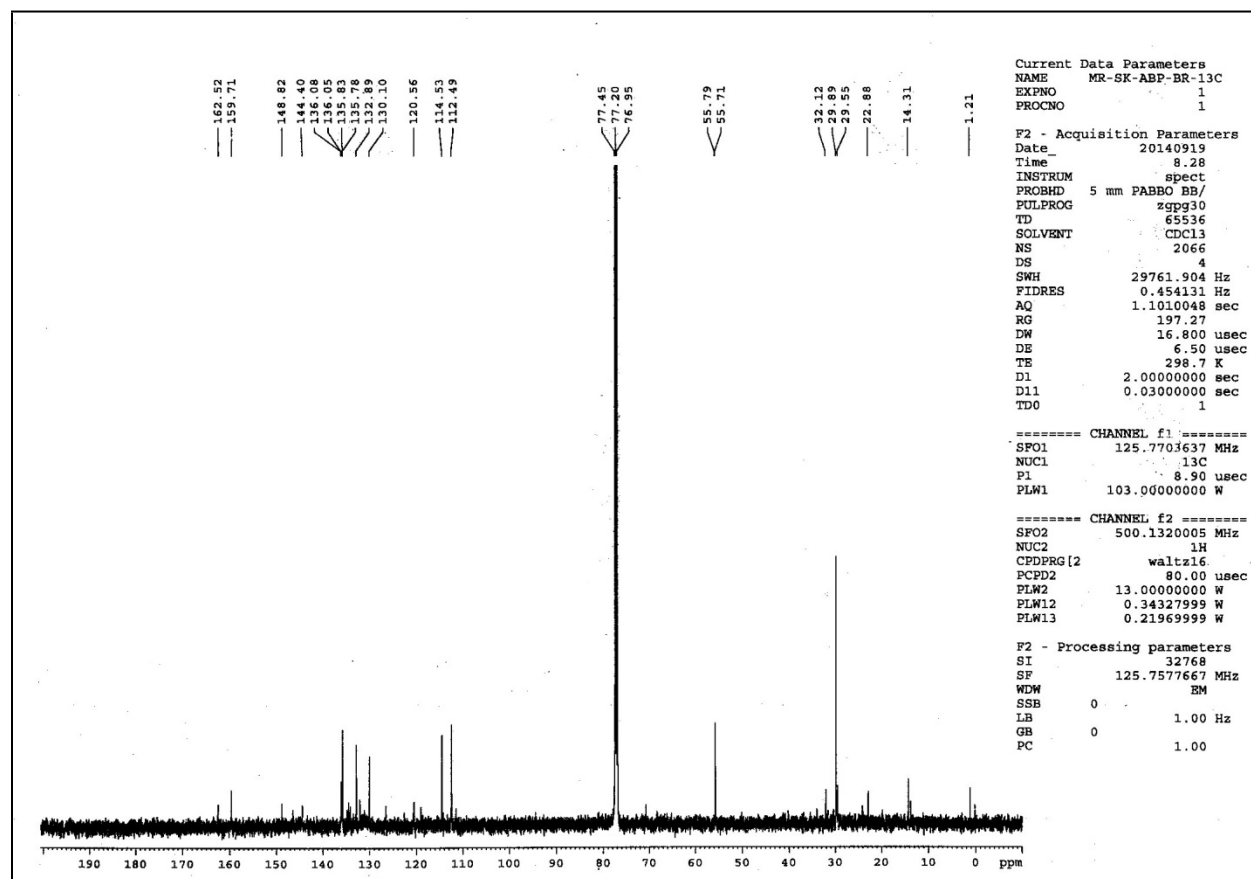

Figure S30:  $^{13}\text{C}$  NMR spectrum of compound **6** recorded in  $\text{CDCl}_3$

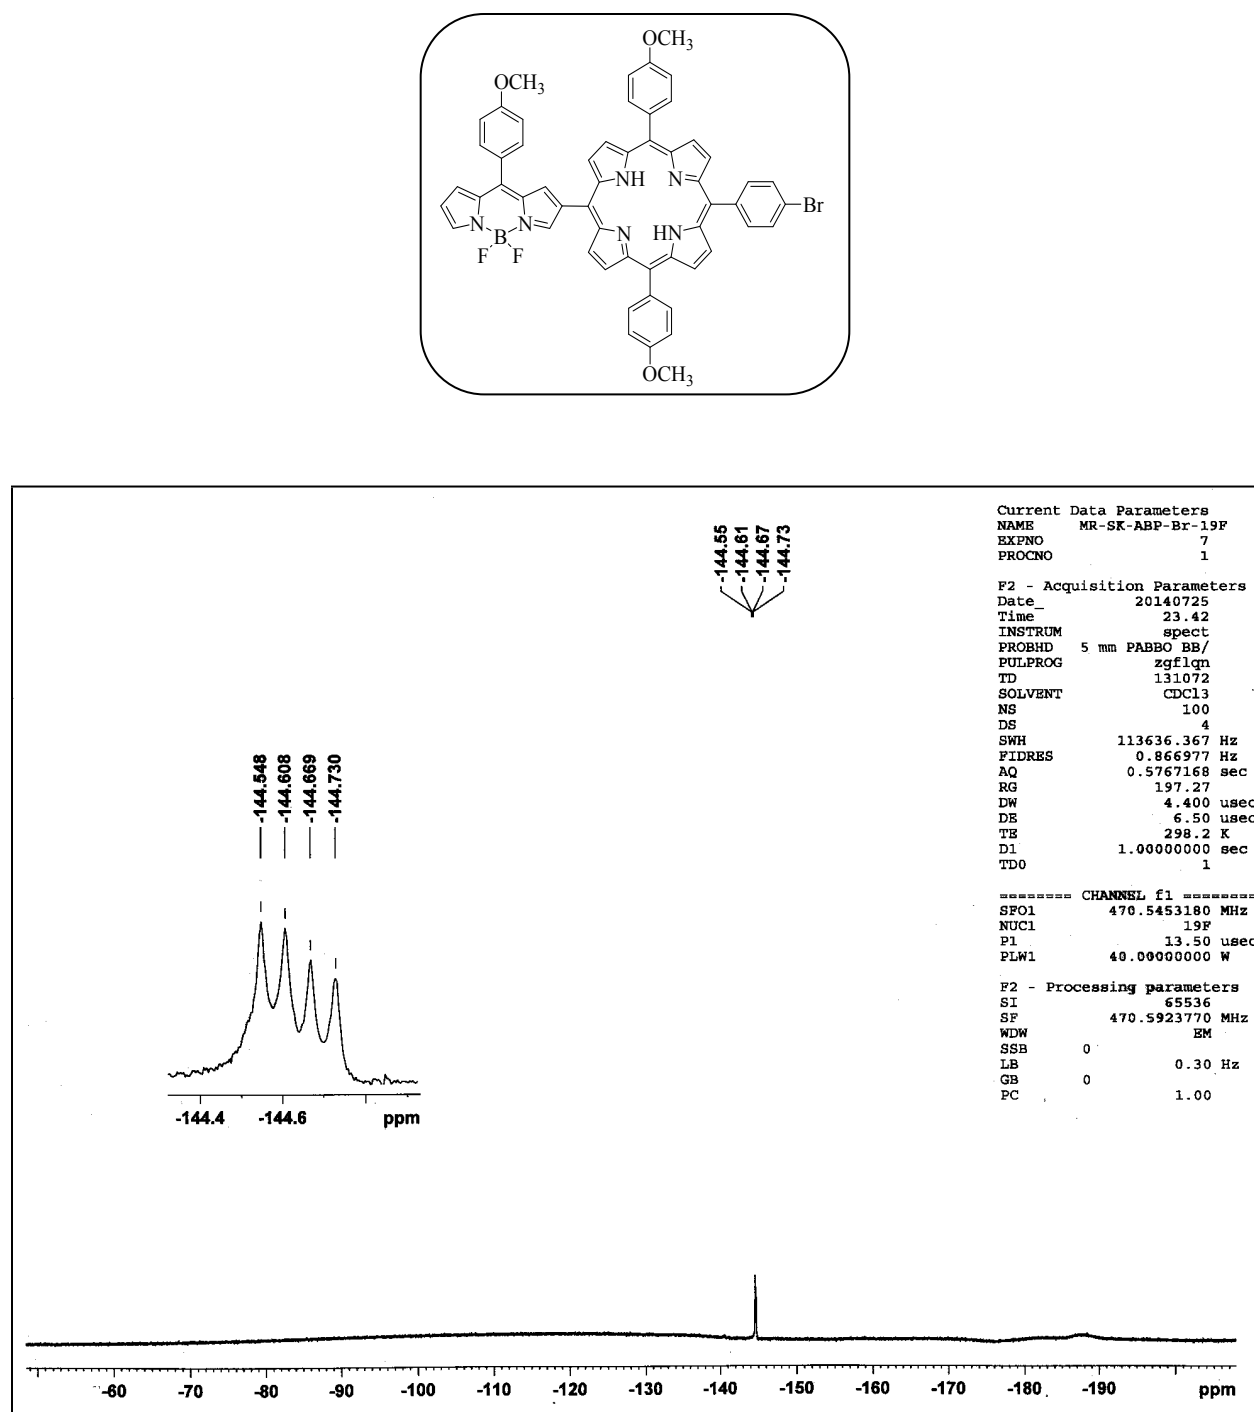

**Figure S31:**  $^{19}\text{F}$  NMR spectrum of compound **6** recorded in  $\text{CDCl}_3$ . Inset shows the expansion

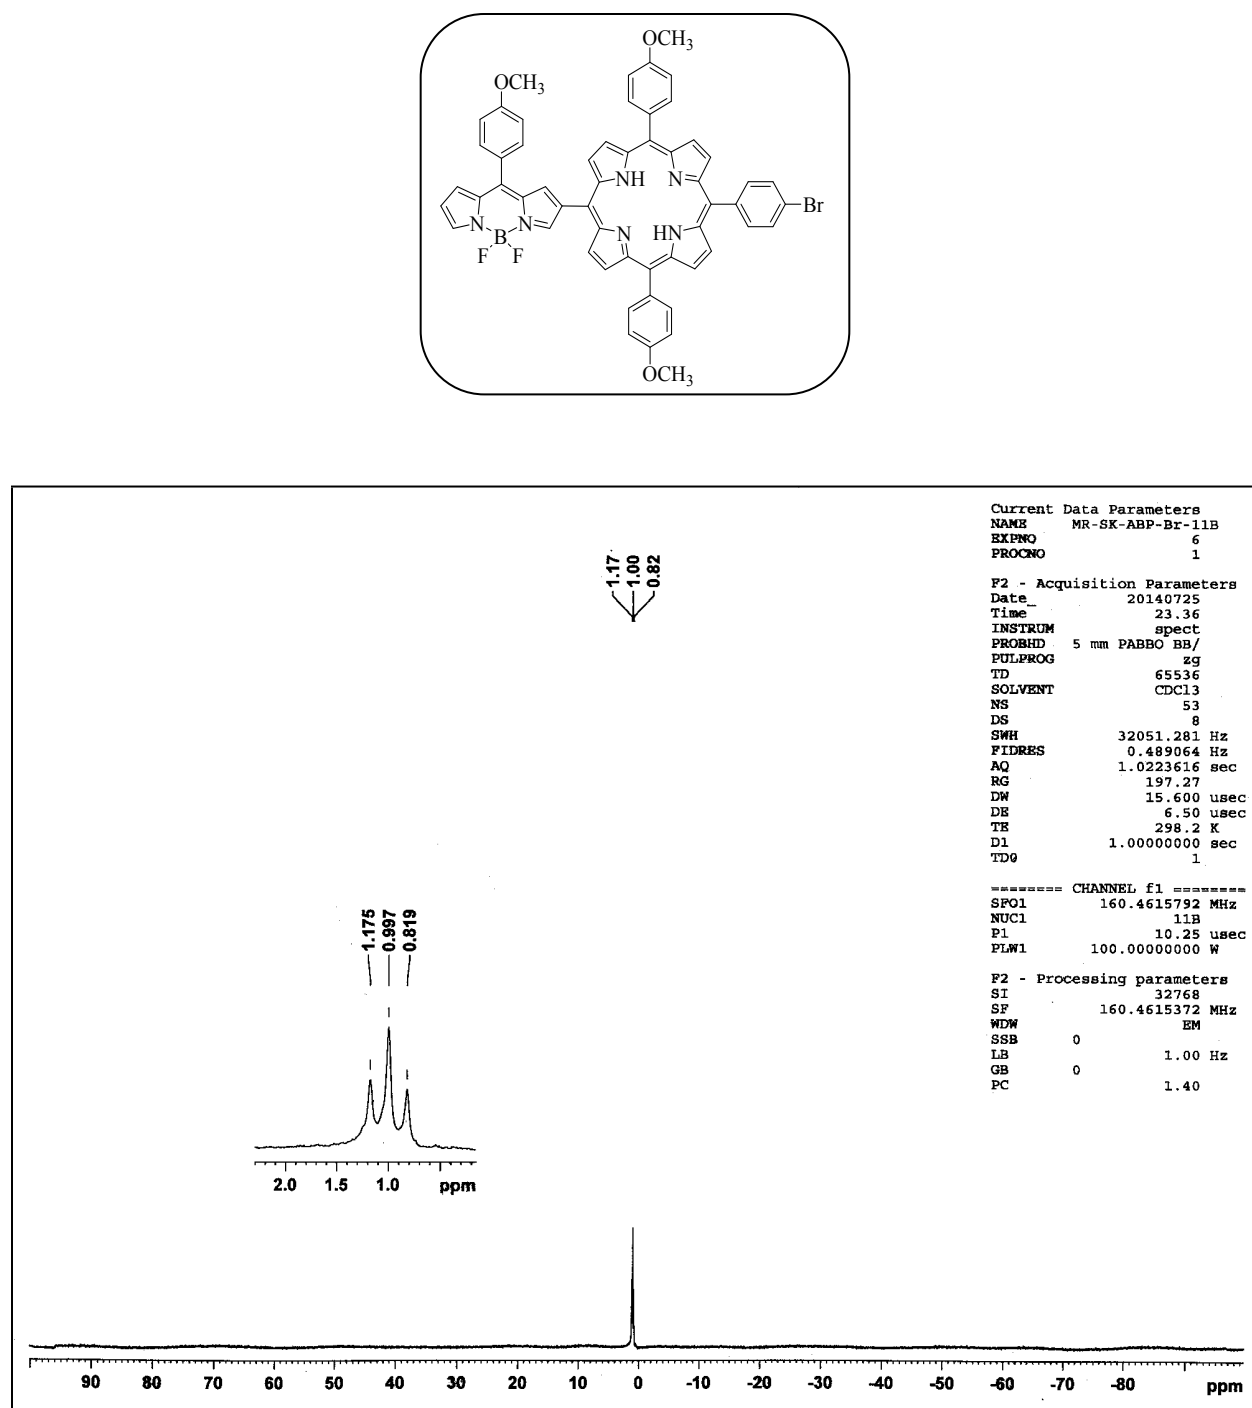

**Figure S32:**  $^{11}\text{B}$  NMR spectrum of compound **6** recorded in  $\text{CDCl}_3$ . Inset shows the expansion

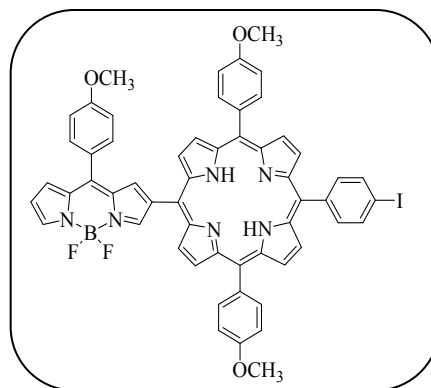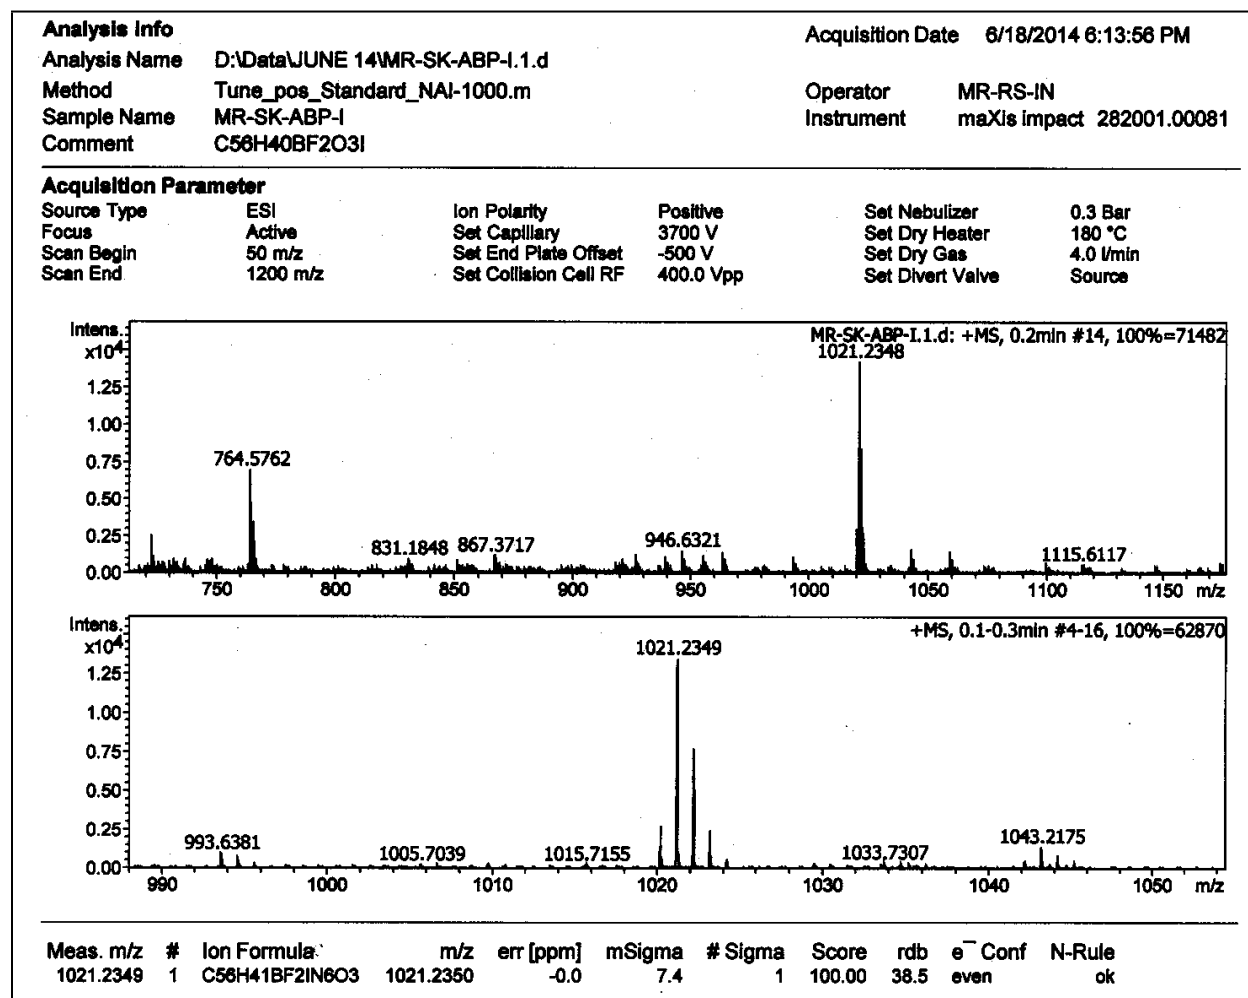

Figure S33: HR mass spectrum of compound 7

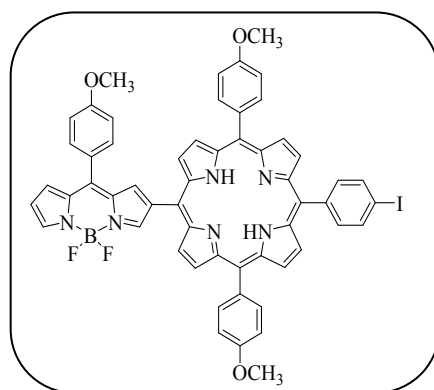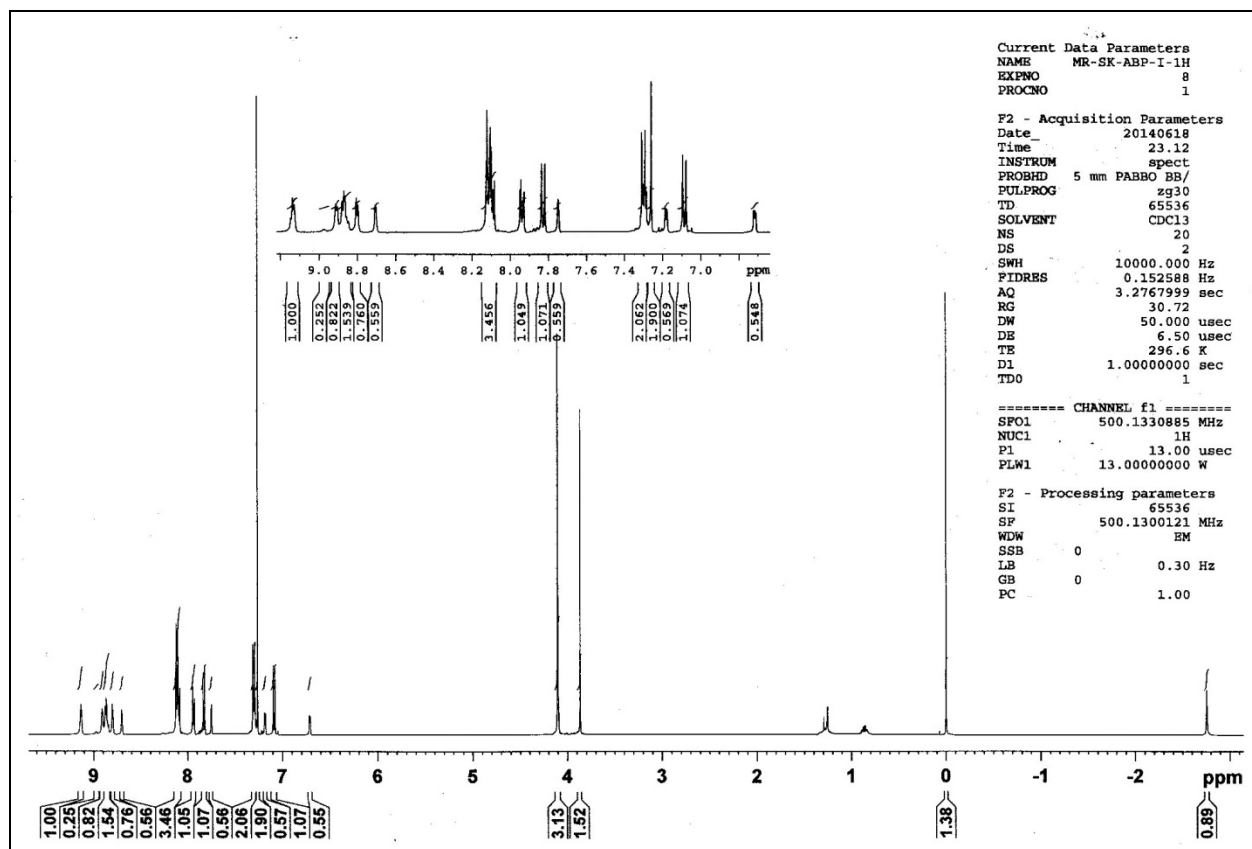

Figure S34:  $^1\text{H}$  NMR spectrum of compound **7** recorded in  $\text{CDCl}_3$

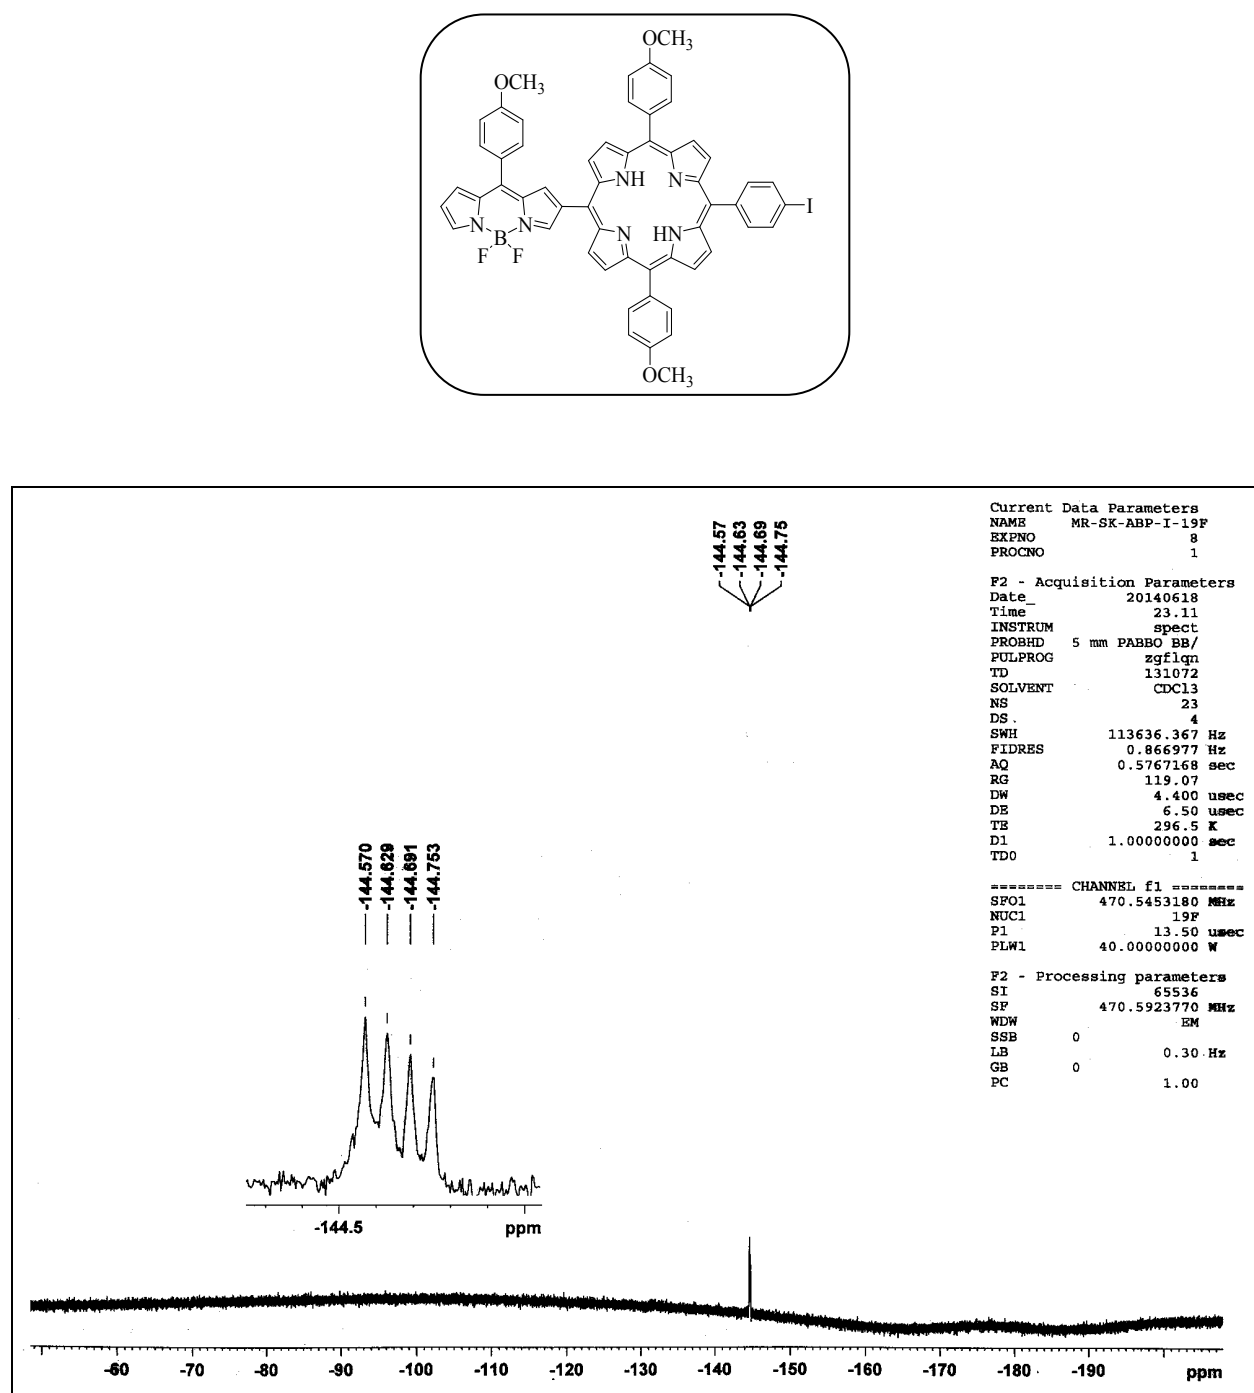

**Figure S35:**  $^{19}\text{F}$  NMR spectrum of compound 7 recorded in  $\text{CDCl}_3$ . Inset shows the expansion

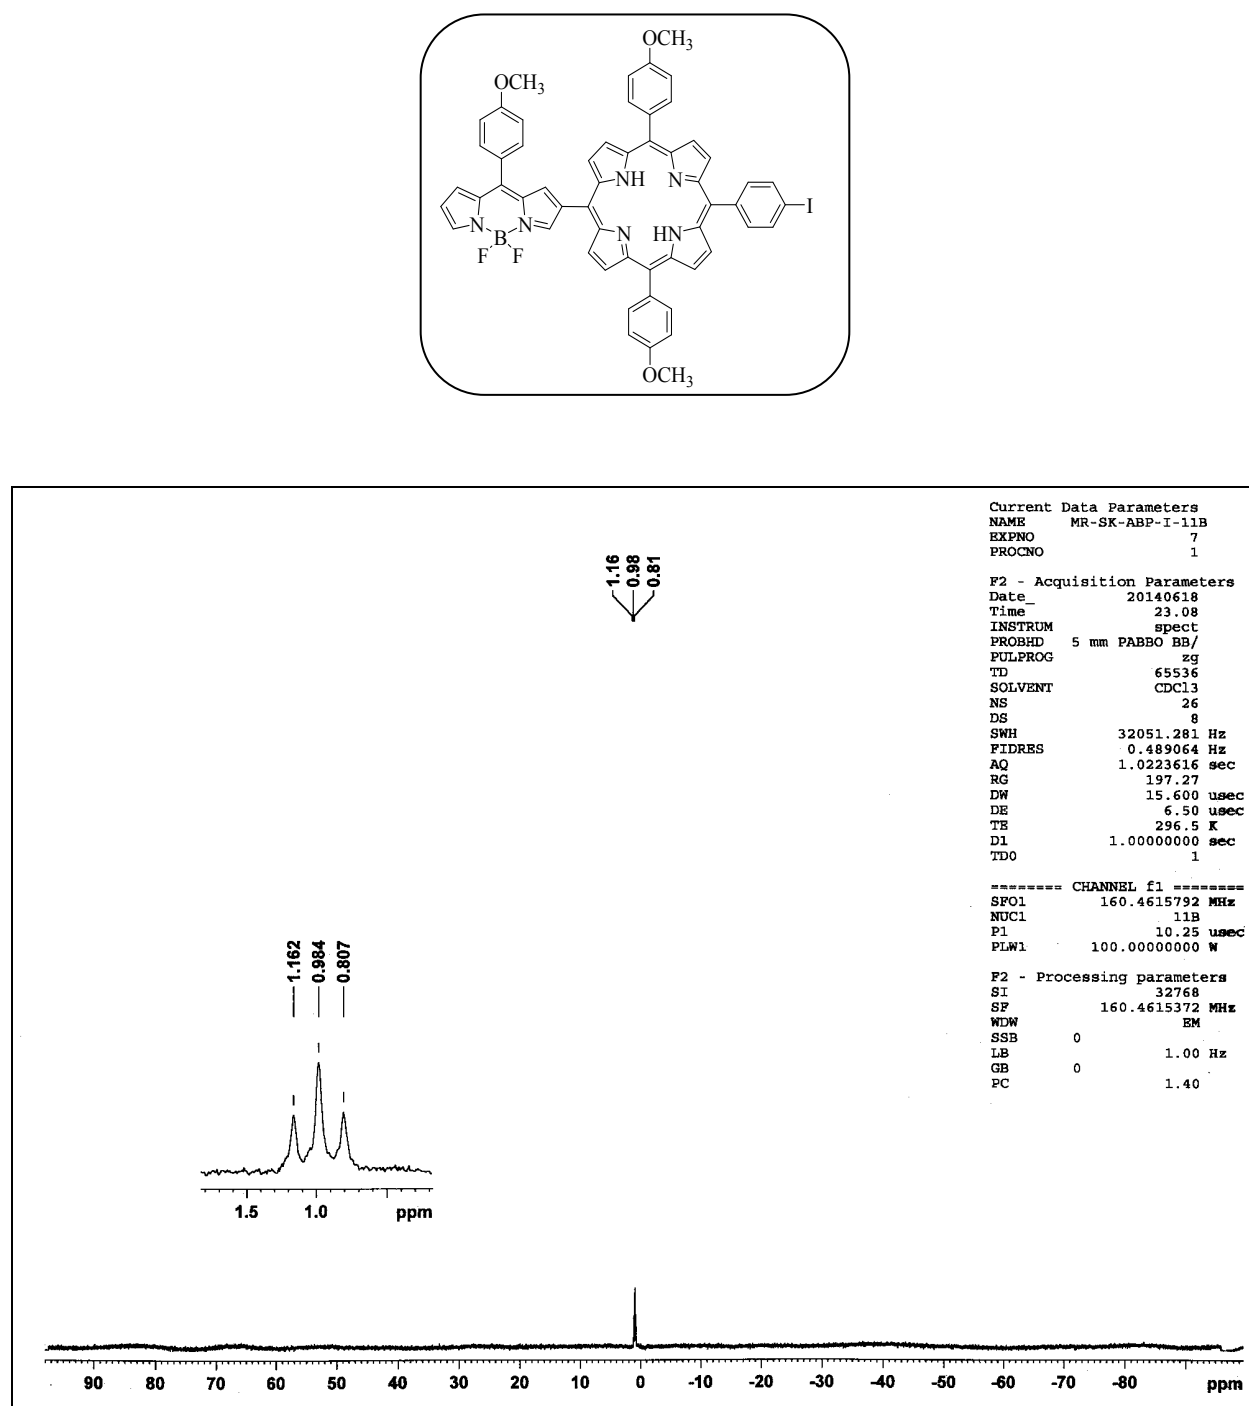

**Figure S36:**  $^{11}\text{B}$  NMR spectrum of compound **7** recorded in  $\text{CDCl}_3$ . Inset shows the expansion

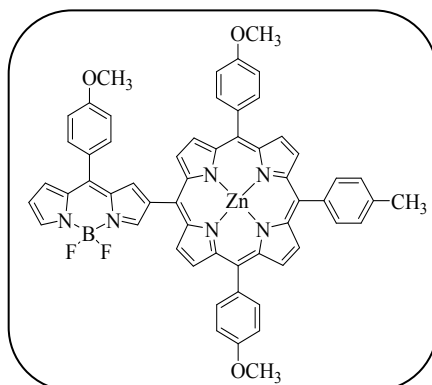

## Elemental Composition Report

### Single Mass Analysis

Tolerance = 100.0 PPM / DBE: min = -1.5, max = 500.0

Selected filters: None

Monoisotopic Mass, Odd and Even Electron Ions

257 formula(e) evaluated with 1 results within limits (up to 50 closest results for each mass)

Elements Used:

C: 0-57 H: 0-42 B: 0-1 N: 0-6 O: 0-3 F: 0-2 <sup>64</sup>Zn: 0-1

Q-ToF MICROMASS (YA-105)

DEPARTMENT OF CHEMISTRY, I.I.T.(B)

18-Aug-2014 18:48:14

C57H41BF2N6O3Zn

MR-SK-PB-CH3ZN 82 (1.523) AM (Top, 4, Ht, 5000.0, 556.28, 1.00); Sm (Mn, 2x4.00); Cm (76:100)

TOF MS ES+

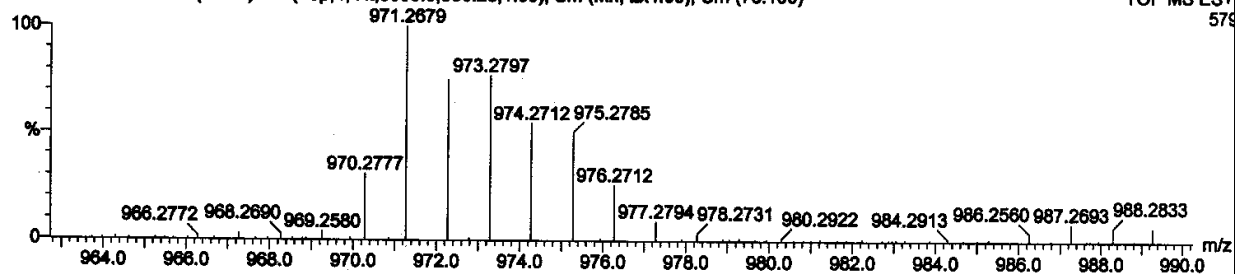

Minimum:

Maximum: 500.0 100.0 -1.5

Mass

Calc. Mass

mDa

PPM

DBE

i-FIT

Formula

971.2679

971.2671

0.8

0.8

39.5

0.4

C57 H42 B N6 O3 F2 <sup>64</sup>Zn

Figure S37: HR mass spectrum of compound **Zn1**

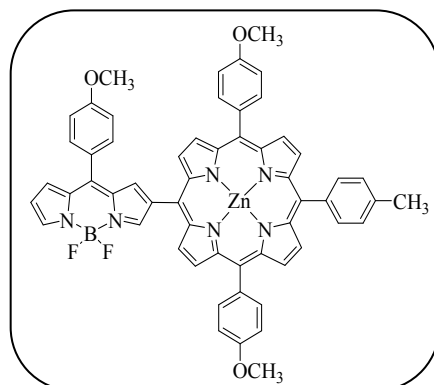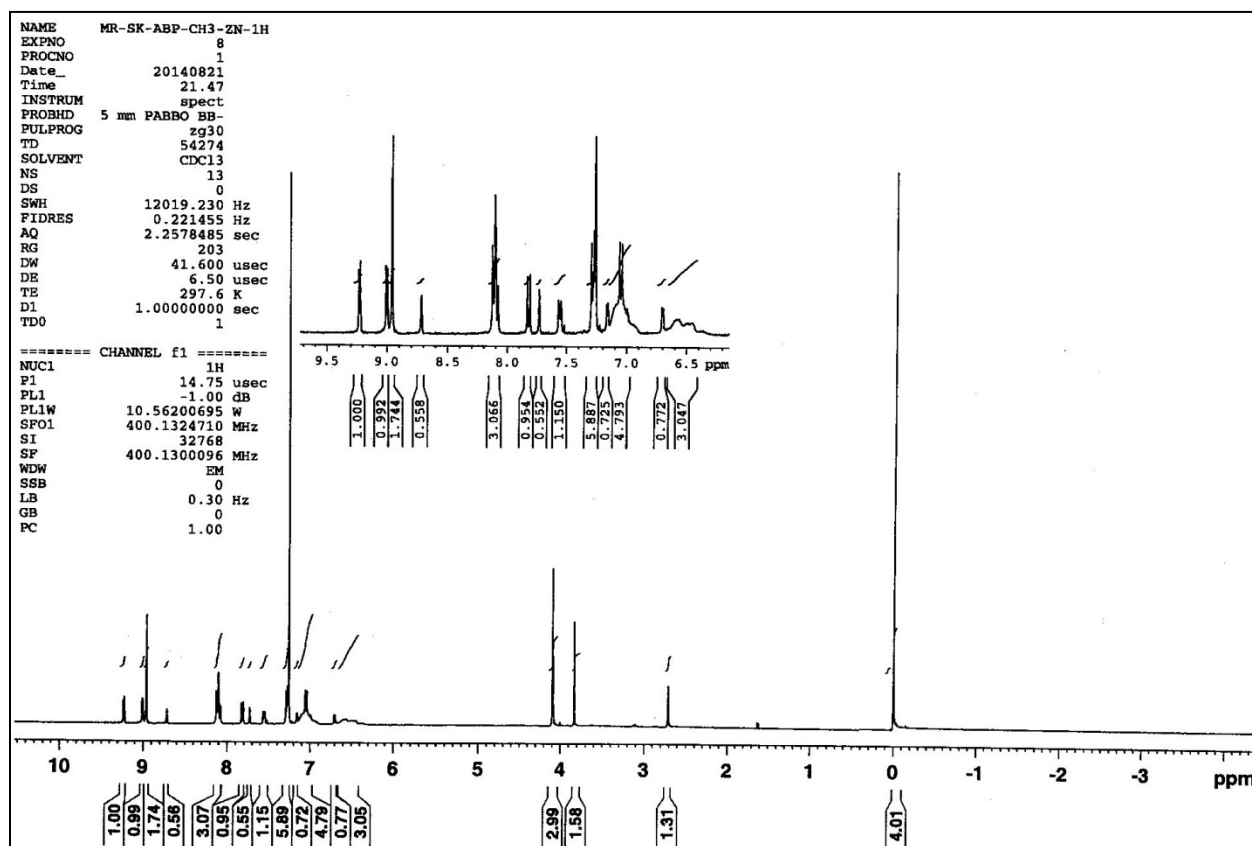

Figure S38:  $^1\text{H}$  NMR spectrum of compound **Zn1** recorded in  $\text{CDCl}_3$

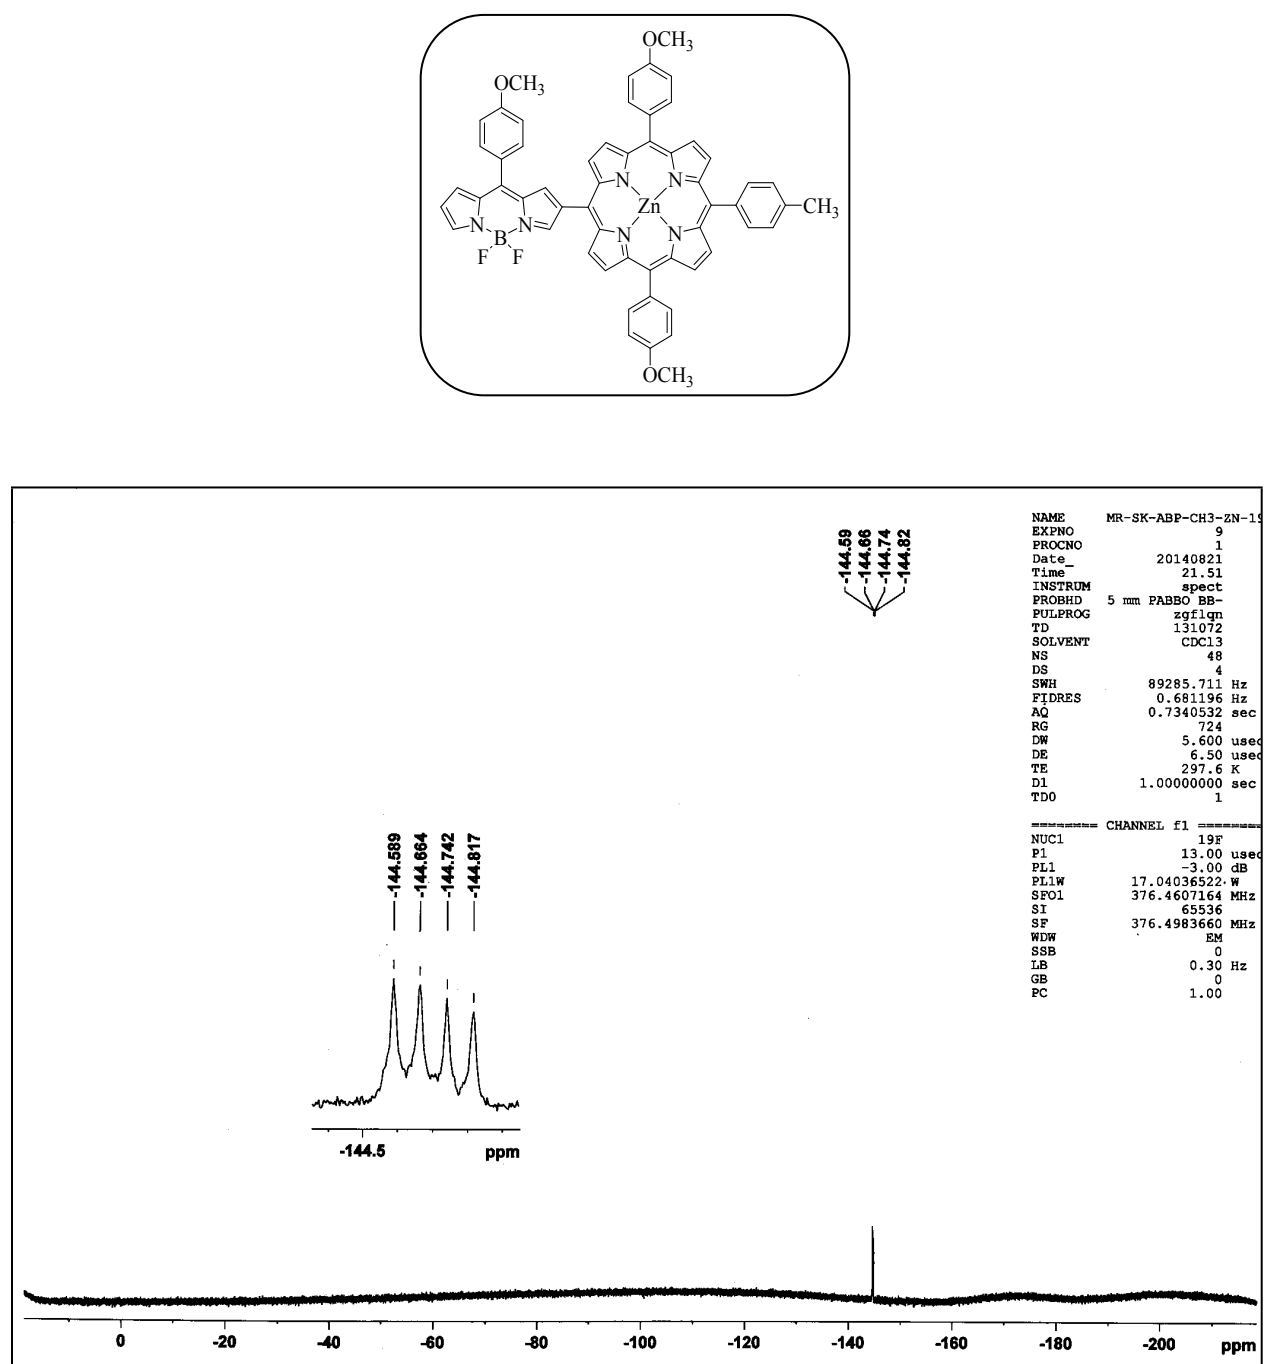

**Figure S39:**  $^{19}\text{F}$  NMR spectrum of compound **Zn1** recorded in  $\text{CDCl}_3$ . Inset shows the expansion

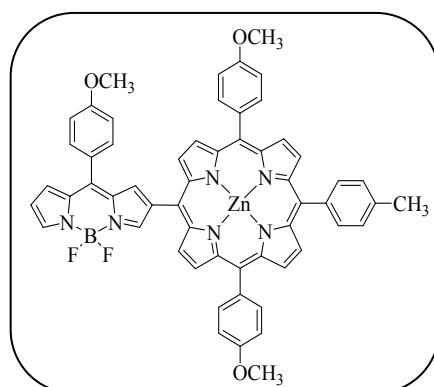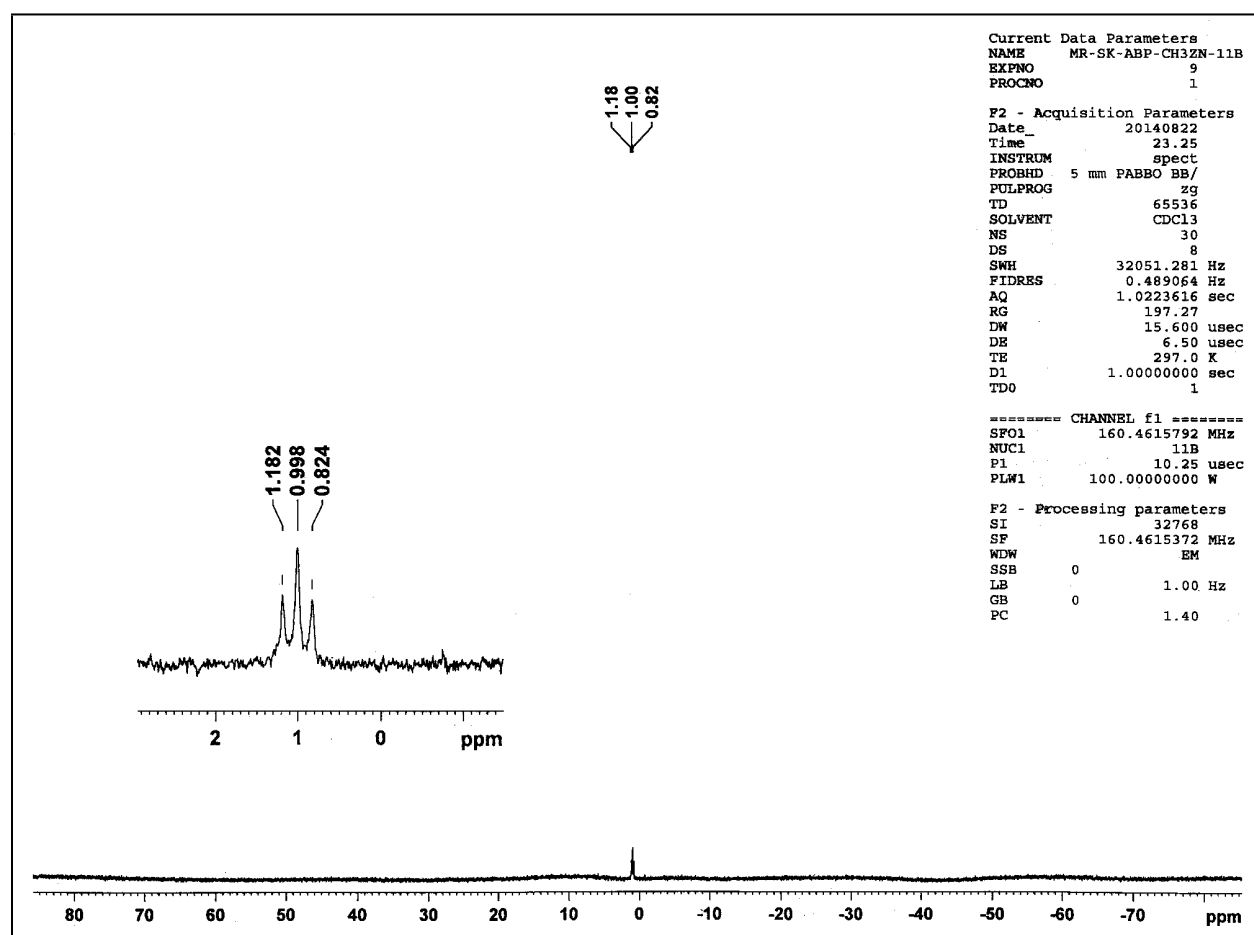

**Figure S40:**  $^{11}\text{B}$  NMR spectrum of compound **Zn1** recorded in  $\text{CDCl}_3$ . Inset shows the expansion

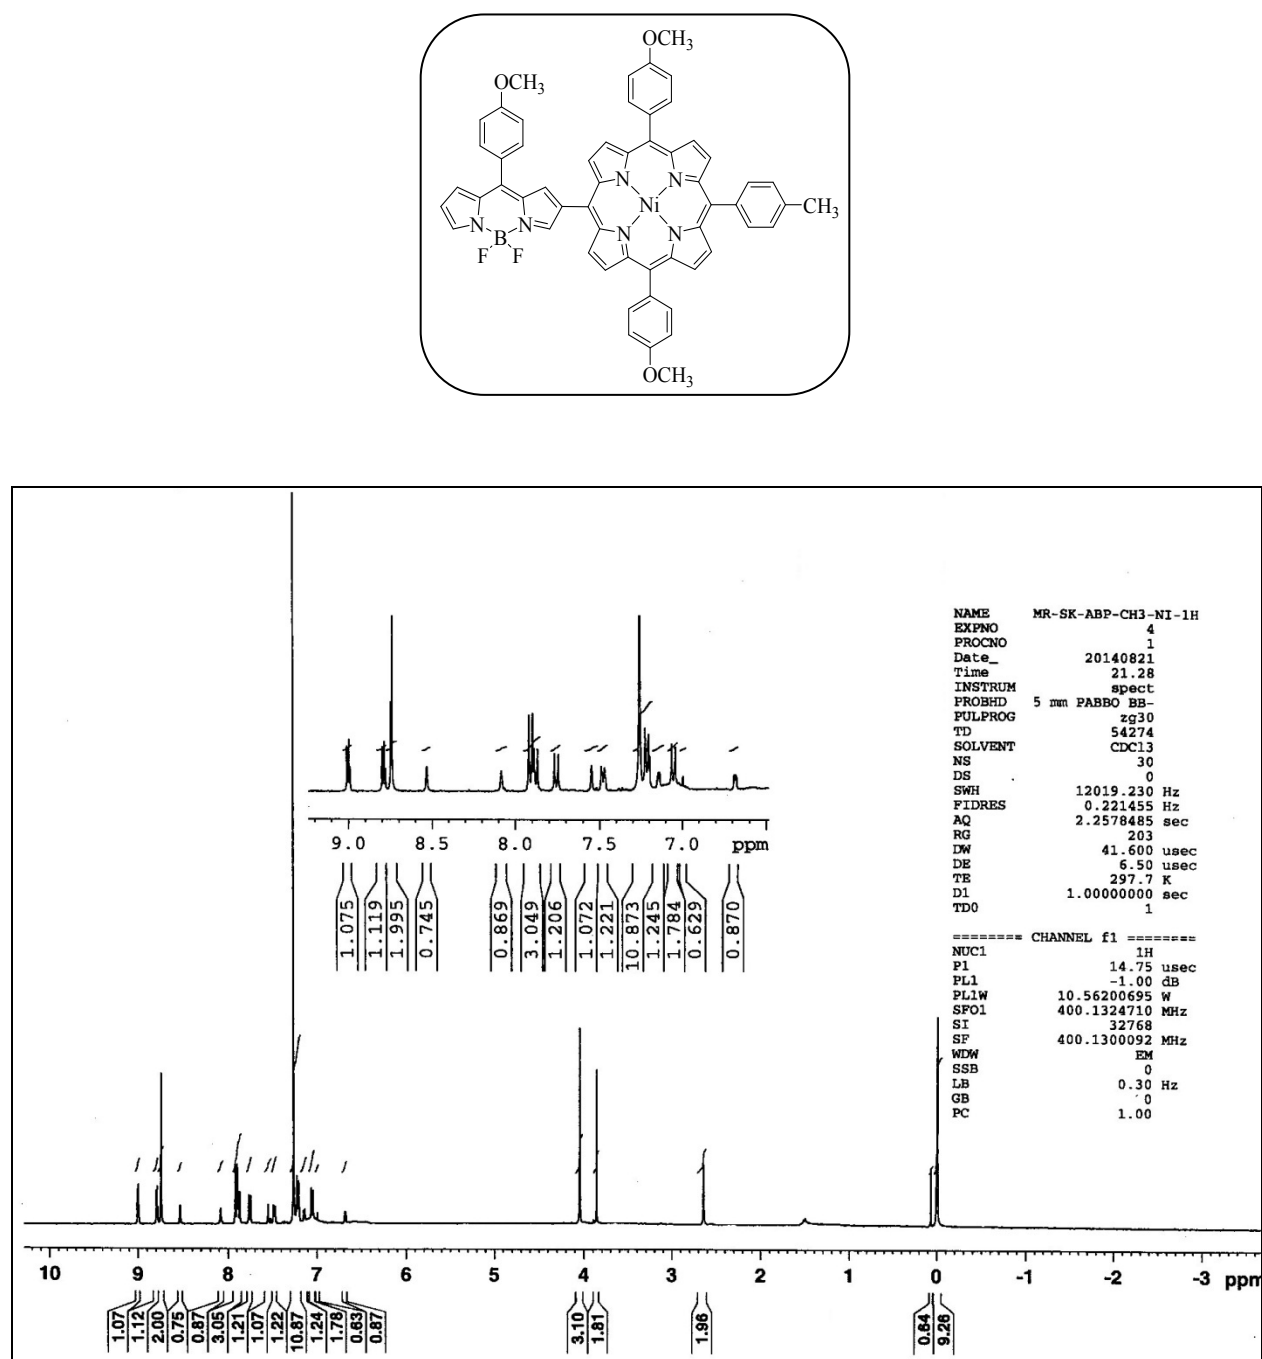

Figure S41:  $^1\text{H}$  NMR spectrum of compound **Ni1** recorded in  $\text{CDCl}_3$

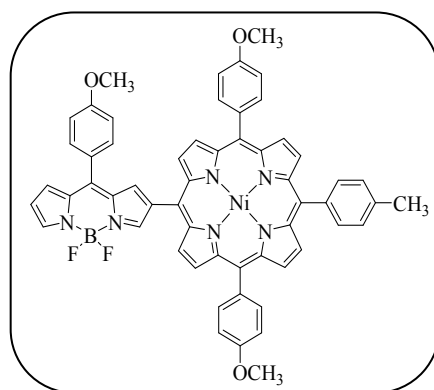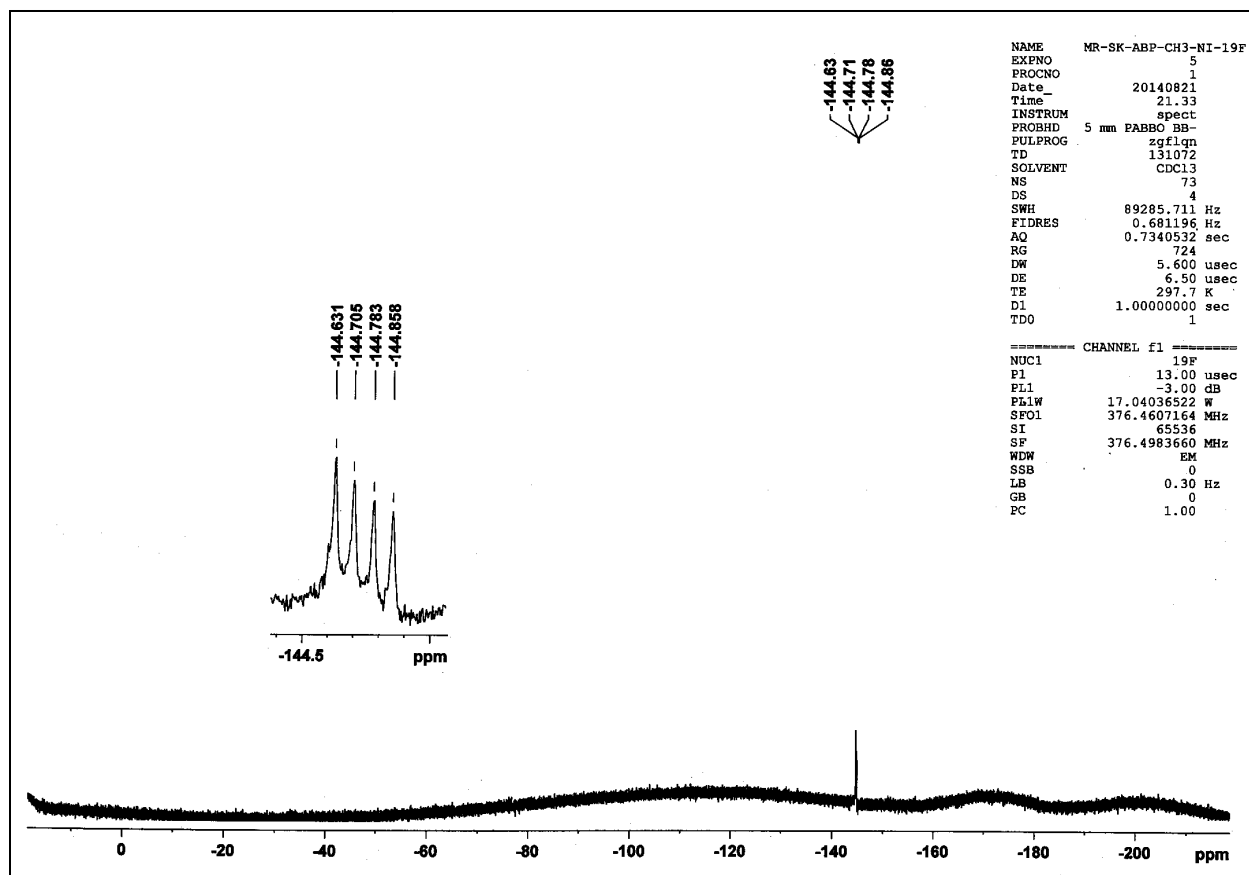

**Figure S42:**  $^{19}\text{F}$  NMR spectrum of compound Ni1 recorded in  $\text{CDCl}_3$ . Inset shows the expansion

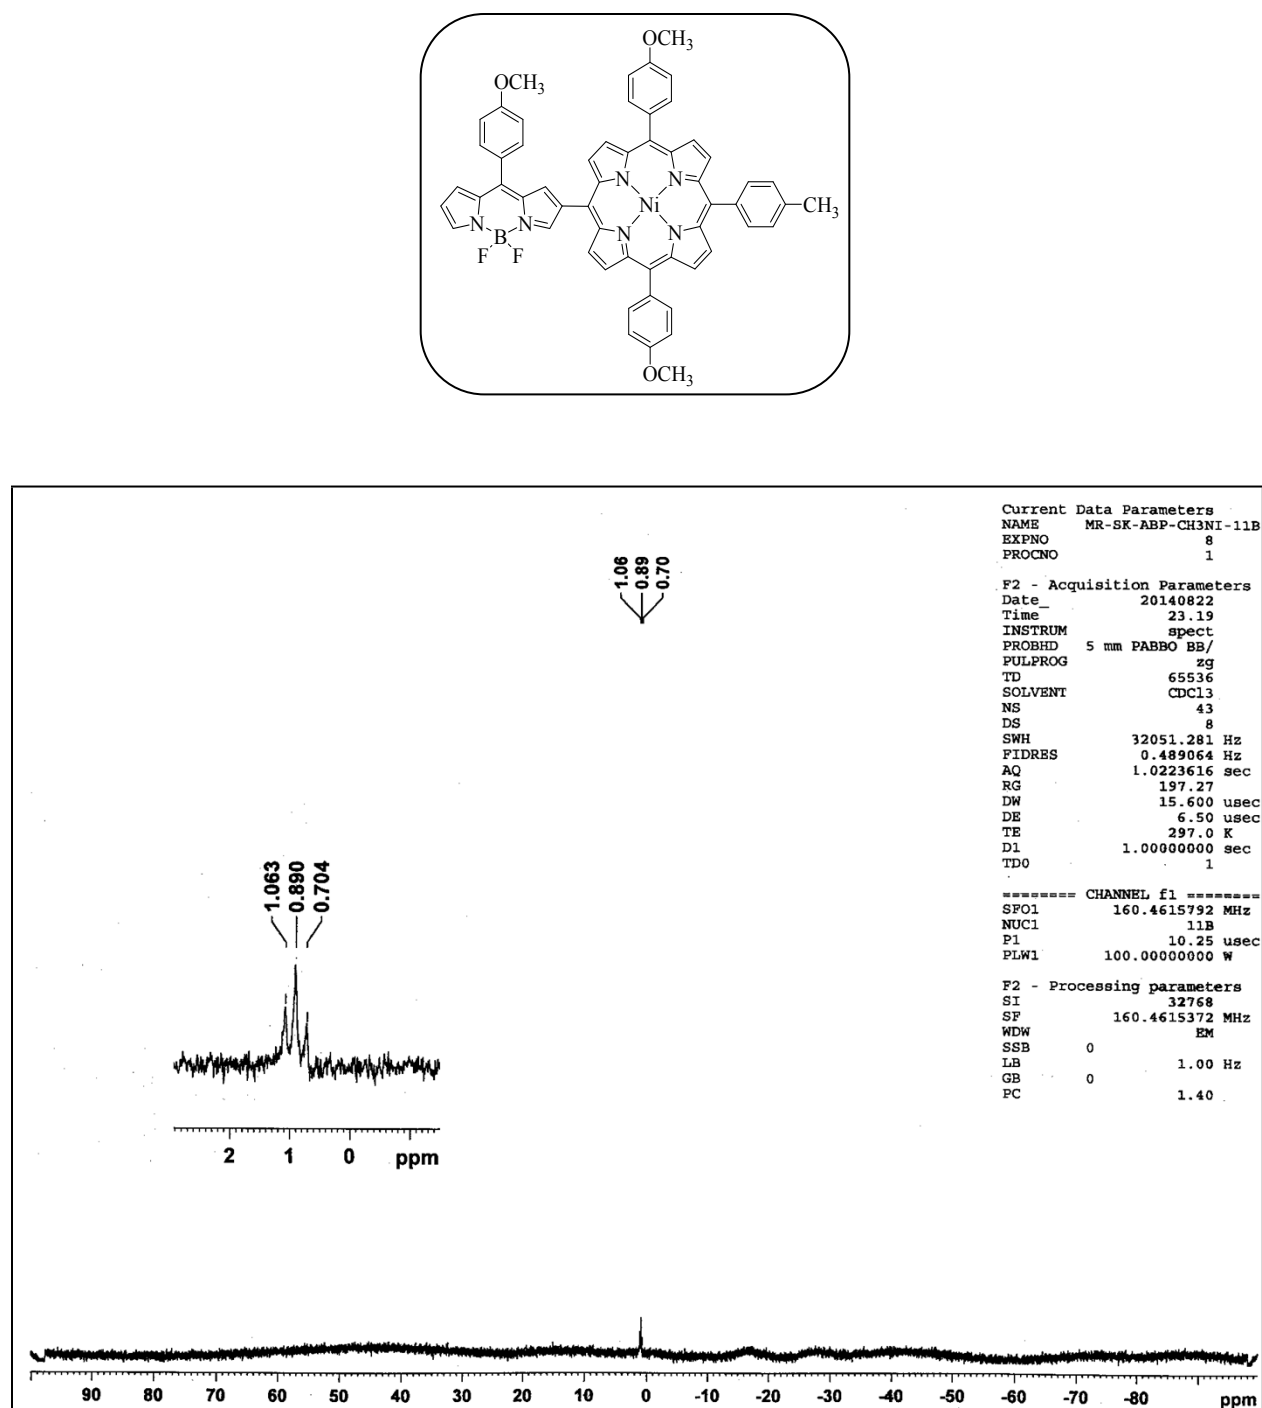

**Figure S43:** <sup>11</sup>B NMR spectrum of compound **Ni1** recorded in CDCl<sub>3</sub>. Inset shows the expansion

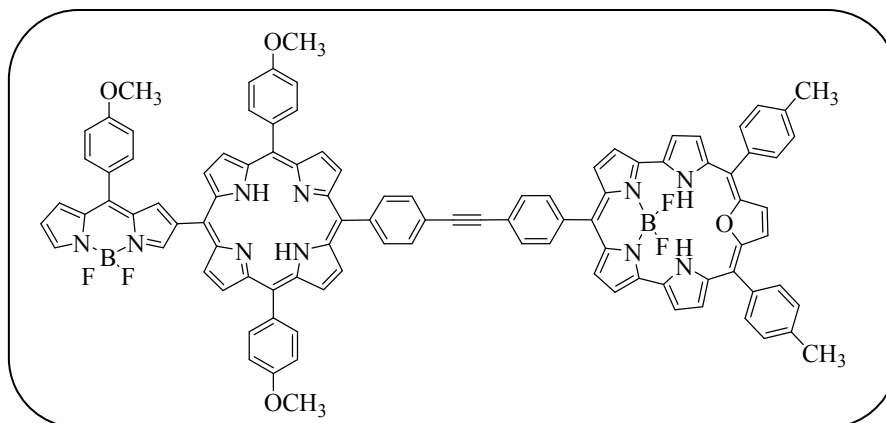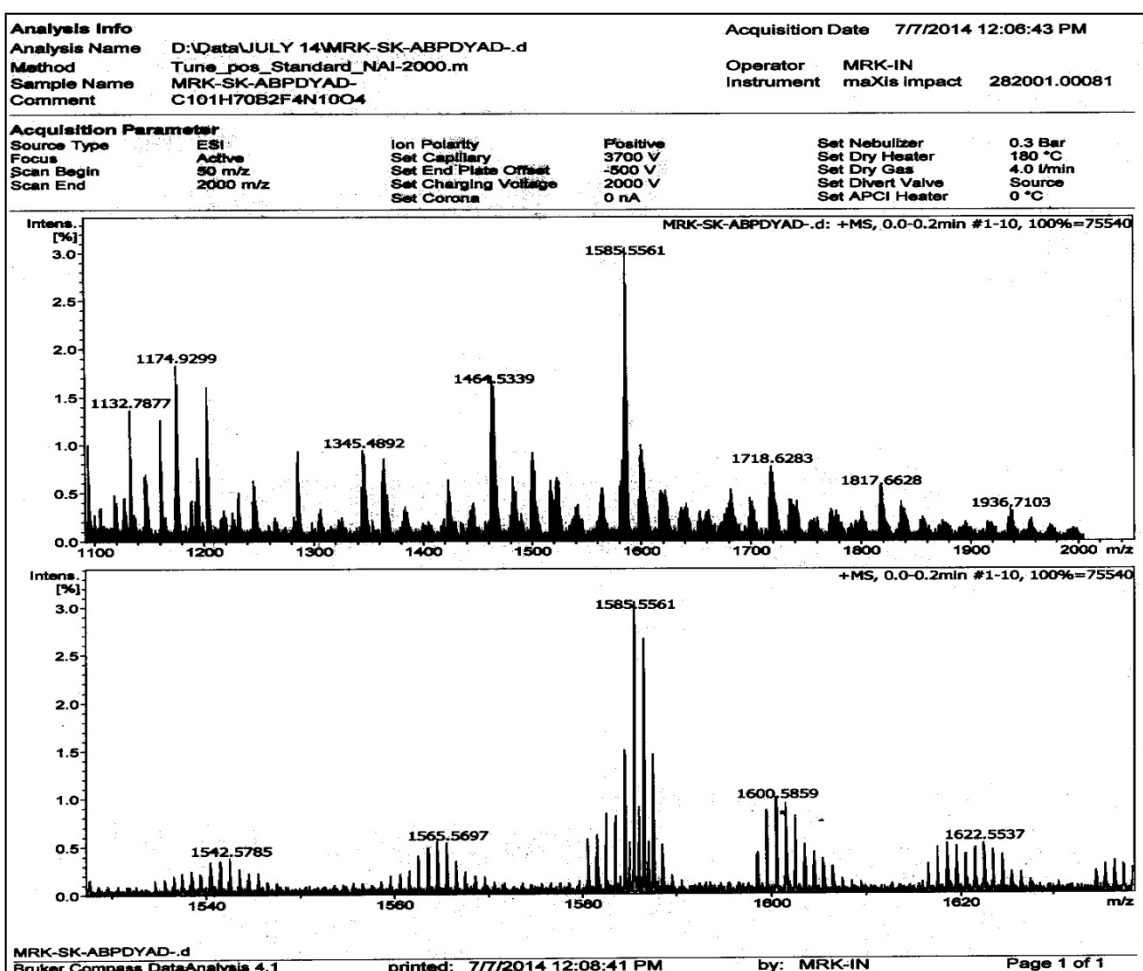

Figure S44: LR mass spectrum of compound 8

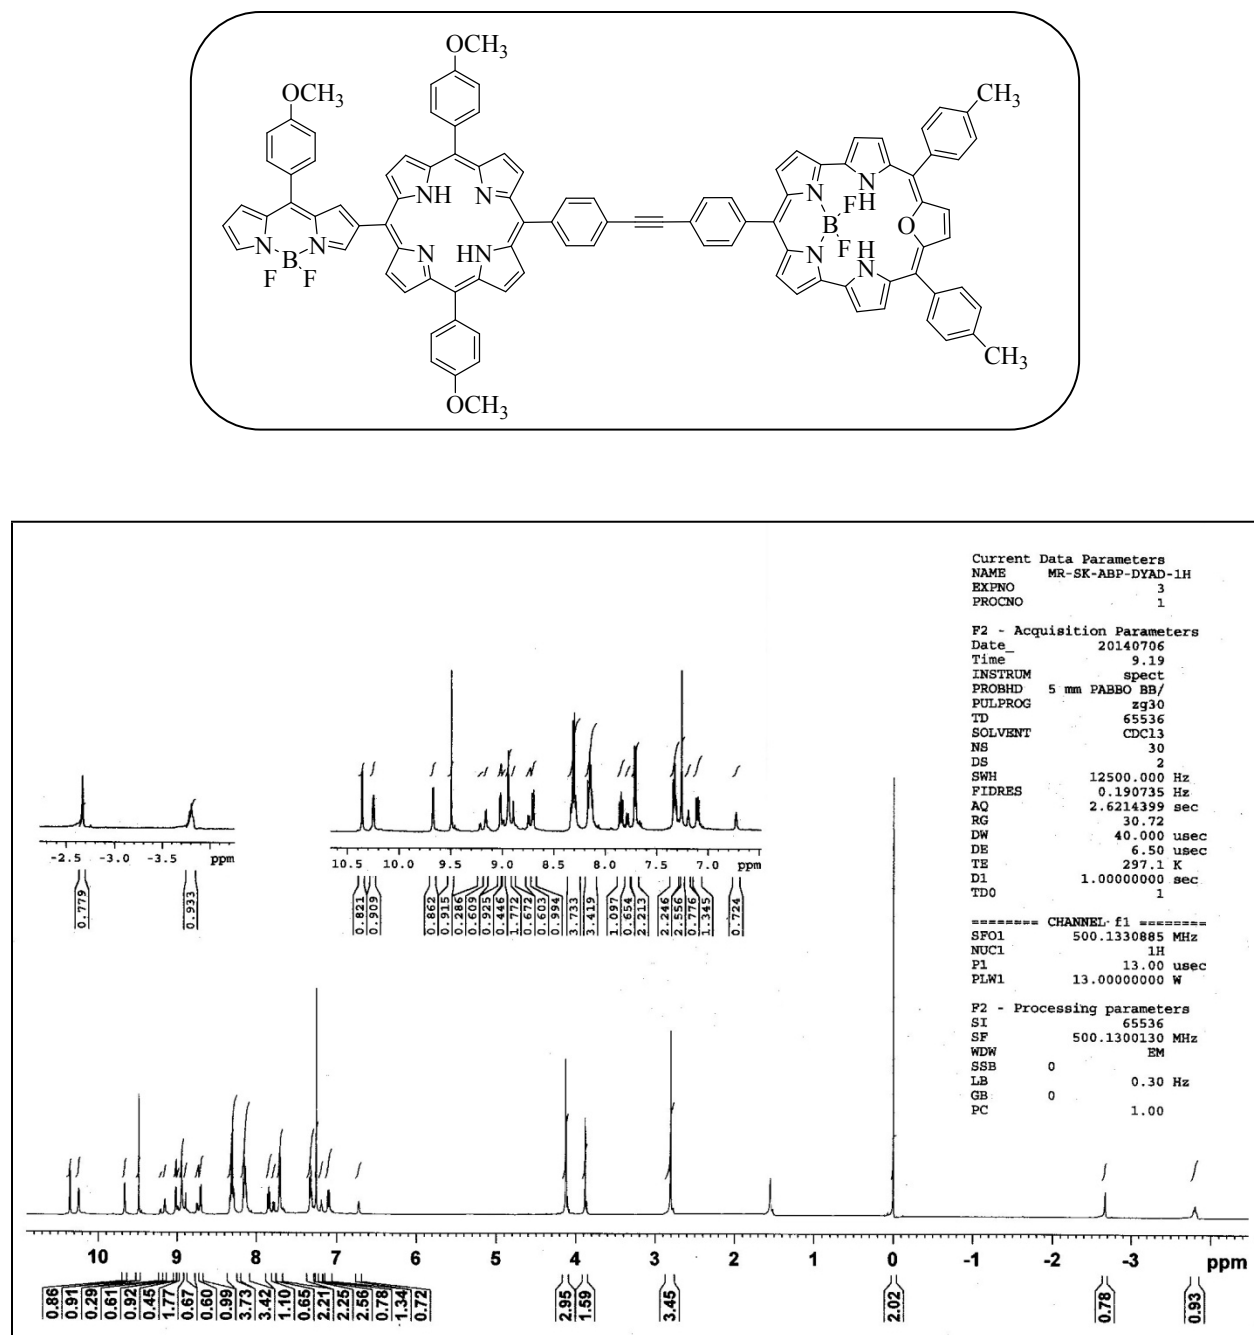

Figure S45:  $^1\text{H}$  NMR spectrum of compound 1 recorded in  $\text{CDCl}_3$

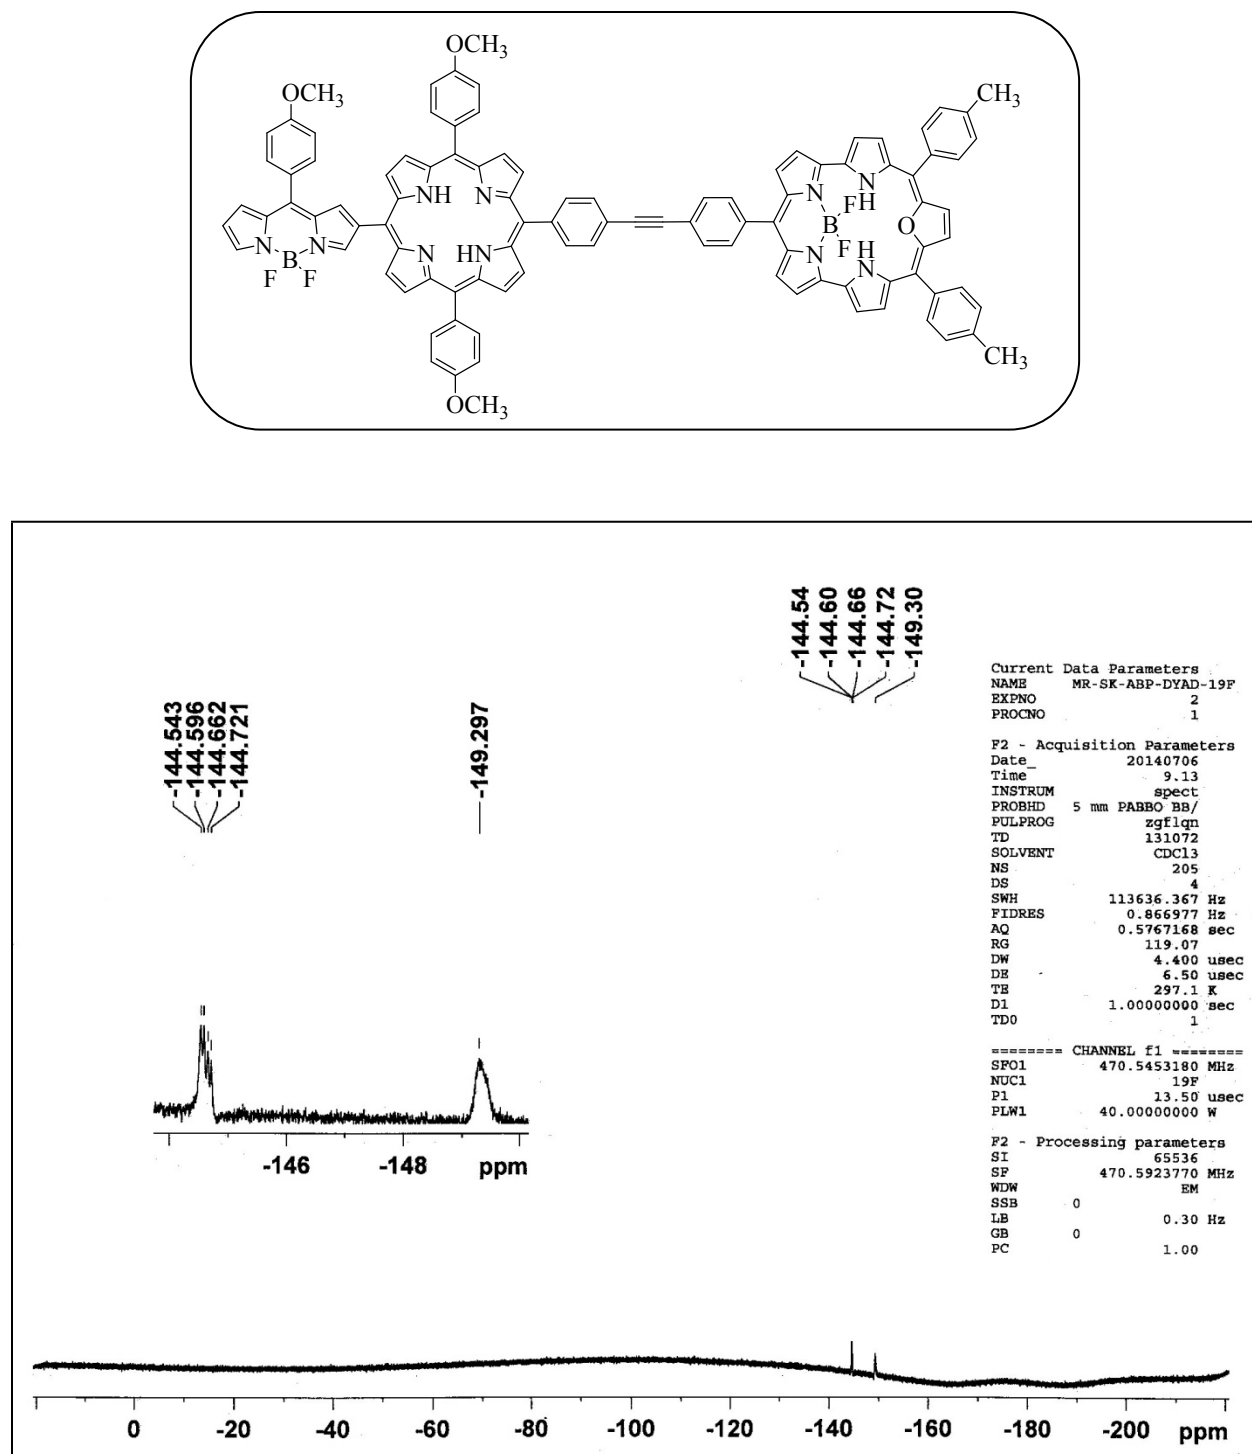

**Figure S46:**  $^{19}\text{F}$  NMR spectrum of compound **8** recorded in  $\text{CDCl}_3$ . Inset shows the expansion

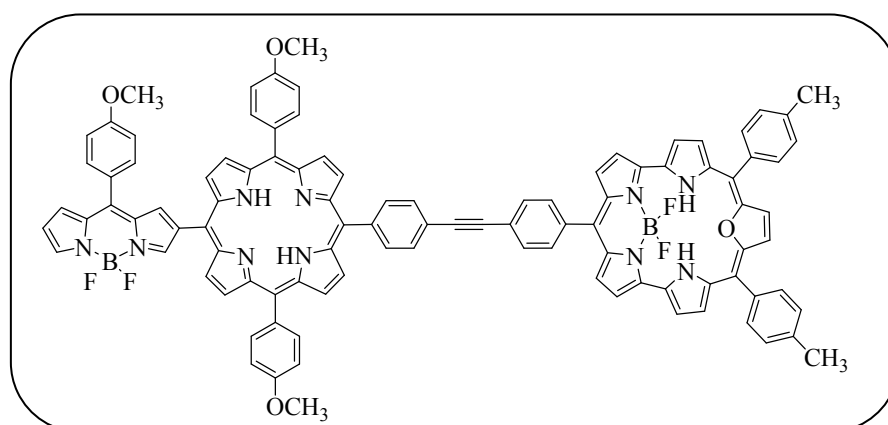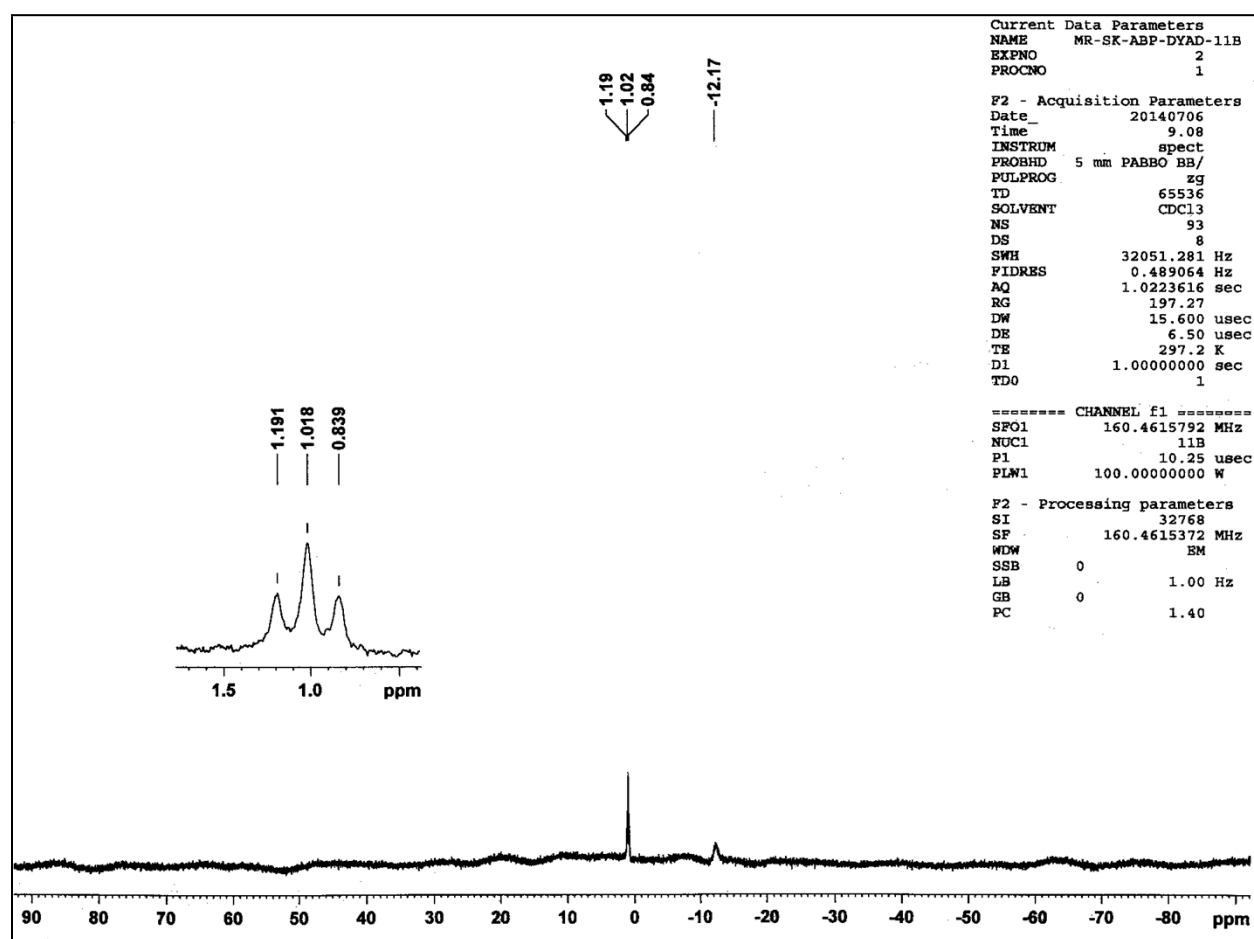

Figure S47:  $^{11}\text{B}$  NMR spectrum of compound **8** recorded in  $\text{CDCl}_3$ . Inset shows the expansion

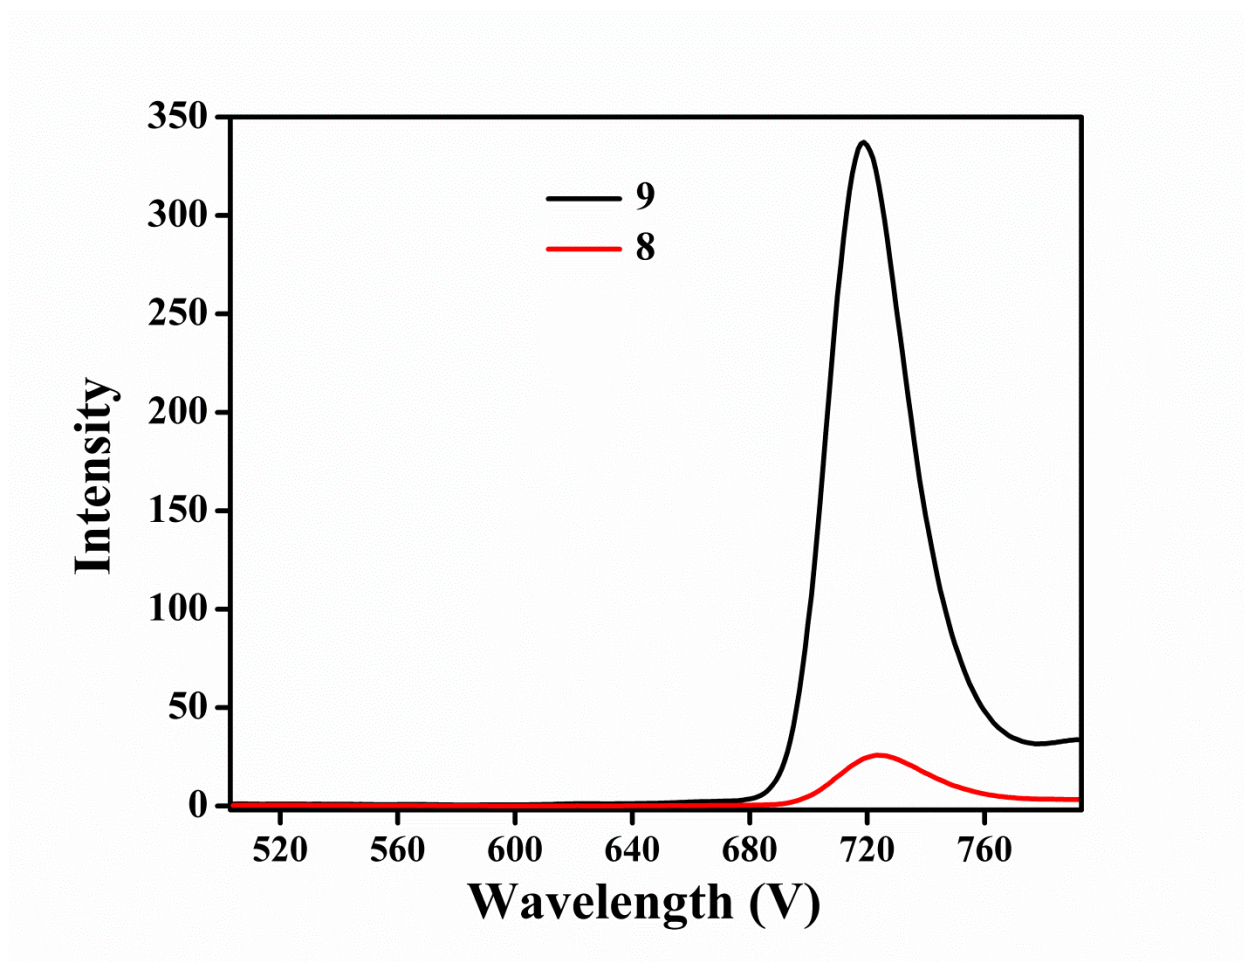

**Figure S48:** Comparison of Emission spectrum of compound **8** and compound **9** (5  $\mu\text{M}$ ) recorded in  $\text{CHCl}_3$  solvents. Excitation wavelength used was 488 nm.
